# Supplementary material for: Descriptive study of sickness absence in Spanish regions in 2018: database study
Source: PubMed Central journal article supplement — BMJ Open. 2020 Oct 30;10(10):e038239. doi: 10.1136/bmjopen-2020-038239 (PMC7604840; doi:10.1136/bmjopen-2020-038239), 2020-10-30
Supplement: bmjopen-2020-038239.draft_revisions.pdf [file bmjopen-2020-038239.draft_revisions.pdf]

# BMJ Open

BMJ Open is committed to open peer review. As part of this commitment we make the peer review history of every article we publish publicly available.

When an article is published we post the peer reviewers' comments and the authors' responses online. We also post the versions of the paper that were used during peer review. These are the versions that the peer review comments apply to.

The versions of the paper that follow are the versions that were submitted during the peer review process. They are not the versions of record or the final published versions. They should not be cited or distributed as the published version of this manuscript.

BMJ Open is an open access journal and the full, final, typeset and author-corrected version of record of the manuscript is available on our site with no access controls, subscription charges or pay-per-view fees (<http://bmjopen.bmj.com>).

If you have any questions on BMJ Open's open peer review process please email [info.bmjopen@bmj.com](mailto:info.bmjopen@bmj.com)

# BMJ Open

## Map of Sickness absence in Spain

|                               |                                                                                                                                                                                                                                                                                                                                                                                                                                                                                                             |
|-------------------------------|-------------------------------------------------------------------------------------------------------------------------------------------------------------------------------------------------------------------------------------------------------------------------------------------------------------------------------------------------------------------------------------------------------------------------------------------------------------------------------------------------------------|
| Journal:                      | <i>BMJ Open</i>                                                                                                                                                                                                                                                                                                                                                                                                                                                                                             |
| Manuscript ID                 | bmjopen-2020-038239                                                                                                                                                                                                                                                                                                                                                                                                                                                                                         |
| Article Type:                 | Original research                                                                                                                                                                                                                                                                                                                                                                                                                                                                                           |
| Date Submitted by the Author: | 09-Mar-2020                                                                                                                                                                                                                                                                                                                                                                                                                                                                                                 |
| Complete List of Authors:     | Alba- Jurado, Matilde-Leonor; National Institute of Social Security, Medical Unit<br>Aguado, María-José; Chief Medical Inspector. , Director of Coordination of Medical Units. National Institute of Social Security.<br>Moreno-Morales, Noelia; University of Malaga Faculty of Health Sciences, Physiotherapy<br>Labajos-Manzanares, Maria Teresa; University of Malaga Faculty of Health Sciences, Physiotherapy<br>Martín-Valero, Rocío; University of Malaga Faculty of Health Sciences, Physiotherapy |
| Keywords:                     | PREVENTIVE MEDICINE, PUBLIC HEALTH, OCCUPATIONAL & INDUSTRIAL MEDICINE                                                                                                                                                                                                                                                                                                                                                                                                                                      |
|                               |                                                                                                                                                                                                                                                                                                                                                                                                                                                                                                             |

SCHOLARONE™  
Manuscripts



I, the Submitting Author has the right to grant and does grant on behalf of all authors of the Work (as defined in the below author licence), an exclusive licence and/or a non-exclusive licence for contributions from authors who are: i) UK Crown employees; ii) where BMJ has agreed a CC-BY licence shall apply, and/or iii) in accordance with the terms applicable for US Federal Government officers or employees acting as part of their official duties; on a worldwide, perpetual, irrevocable, royalty-free basis to BMJ Publishing Group Ltd ("BMJ") its licensees and where the relevant Journal is co-owned by BMJ to the co-owners of the Journal, to publish the Work in this journal and any other BMJ products and to exploit all rights, as set out in our [licence](#).

The Submitting Author accepts and understands that any supply made under these terms is made by BMJ to the Submitting Author unless you are acting as an employee on behalf of your employer or a postgraduate student of an affiliated institution which is paying any applicable article publishing charge ("APC") for Open Access articles. Where the Submitting Author wishes to make the Work available on an Open Access basis (and intends to pay the relevant APC), the terms of reuse of such Open Access shall be governed by a Creative Commons licence – details of these licences and which [Creative Commons](#) licence will apply to this Work are set out in our licence referred to above.

Other than as permitted in any relevant BMJ Author's Self Archiving Policies, I confirm this Work has not been accepted for publication elsewhere, is not being considered for publication elsewhere and does not duplicate material already published. I confirm all authors consent to publication of this Work and authorise the granting of this licence.

## TITLE PAGE

**TITLE:** MAP OF SICKNESS ABSENCE IN SPAIN**AUTHORS:** Matilde-Leonor Alba-Jurado<sup>1</sup>, María-José Aguado-Benedí<sup>2</sup>, Noelia Moreno-Morales<sup>3</sup>, María Teresa Labajos-Manzanares<sup>3</sup>, Rocío Martín-Valero<sup>3</sup>CORRESPONDENCE AUTHOR: [rovalemas@gmail.com](mailto:rovalemas@gmail.com)

<sup>1</sup>Medical Inspector. Medical Unit. National Institute of Social Security. Kandinsky 12 Bajo, 2010 Málaga, Spain. Email: [matilde-leonor.alba@seg-social.es](mailto:matilde-leonor.alba@seg-social.es)

<sup>2</sup>Chief Medical Inspector. General Deputy Director of Coordination of Medical Units. National Institute of Social Security. Padre Damian 4-6, 6º, 28036, Madrid, Spain.

Associate professor of Department of Legal Medicina, Patholgy and Psychiatry. Complutense University of Madrid. Spain.

<sup>3</sup>University Professor of Department of Physiotherapy, Faculty of Health Sciences, University of Malaga, Arquitecto Francisco Peñalosa 3, Ampliación de Campus de Teatinos, 29071 Malaga, Spain

WORD COUNT: 2.198 words

39 References

5 Tables

**KEYWORDS:** PREVENTIVE MEDICINE, PUBLIC HEALTH, OCCUPATIONAL & INDUSTRIAL MEDICINE, SICKNESS ABSENCE, HEALTH CARE WORKERS**Orcid ids :** Matilde-Leonor Alba-Jurado <https://orcid.org/0000-0002-3640-1047>Noelia Moreno Morales <https://orcid.org/0000-0001-5907-9735>Maria Teresa Labajos Manzanares <https://orcid.org/0000-0002-3911-4406>Rocío Martín Valero <http://orcid.org/0000-0002-1664-3647>

## TITLE: MAP OF SICKNESS ABSENCE IN SPAIN

### ABSTRACT

**Objectives:** To provide a broad and thorough description of sickness absence (SA) in Spain, focusing on the different regions of the country and stressing on its main characteristics.

**Methods:** A study of the SA processes managed by the medical units of the Spanish Institute of Social Security in 2018. The geographical scope of this observational study is the Autonomous Community, describing incidence, prevalence and average duration, by diagnostic chapter, number of workers in SA and average duration by age ranges and sex, diagnoses and economic activities that generate SA cases.

**Results:** We analysed a total of 540,045 SA processes by common contingencies and 63,441 by professional contingencies. The national average prevalence in non-professional contingencies is 32.98/1000 for employees and 30.48/1000 for self-employed workers; in professional contingencies it is 3.99/1000. The national incidence in non-professional contingencies is 24.8/1000 for employees and 9.51/1000 for self-employed workers; in professional contingencies it is 3.55/1000. The average duration is 58.67 days, with the longest duration being neoplasms, and the shortest corresponds to infectious disease. "Influenza" and "lower back pain" are the diagnoses that generate the largest number of SA situations, along with the characteristic of working for the Public Administration.

**Conclusions:** SA is one of the benefits of the Social Security system whose economic cost was 11,554,711.16 euros in 2019, 8.89% of the general Social Security budget for that year. This concerning cost demands a better control, making it necessary to improve the knowledge of the diagnosis and the circumstances that surround the worker.

## KEY MESSAGES

### What is already known about this subject?

- Sickness absence (SA) is one of the main causes of work absenteeism, loss of productivity and workers' health, permanent disability, and greater risk of disease, unemployment and death in Spain and nearby countries.
- Increasing efforts are being made to control SA and early reincorporation of workers who have suffered a period of SA due to disease or accident.

### What are the new findings?

- There is a much higher incidence in Spain among employees than among self-employed workers, whereas the average duration is much higher in the latter.
- There is a high frequency of SA cases among workers of the Public Administration in Spain.

### How could this affect the clinical policies or practices in a predictable future?

- This implies the need to increase the effort to know the main factors that influence SA in Spain, the characteristics of the workers and the activity they carry out.
- It is essential to implement a strict control of the diseases with greater incidence and prevalence, studying the age ranges, sex and the characteristics of the job in which they are produced, in order to reduce the negative effects on healthcare, social and economic costs.

## STRENGTHS AND LIMITATIONS OF THIS STUDY

This work provides a broad and thorough description of sickness absence (SA) in Spain, focusing on the different regions of the country and stressing on its main characteristics, thus generating a global view of this benefit. This implies the need to increase the effort to know the main factors that influence SA in Spain, the characteristics of the workers and the activity they carry out. From our knowledge, this is the first study where summarized ranking of the eight most frequent diagnoses and the ten main economic activities that generate sickness absence (SA)

## INTRODUCTION

Sickness absence (SA) is one of the benefits of Social Security, included in article 169 of the Consolidated Text of the General Law of Social Security, RDL 8/2015 of October 30<sup>th</sup>. It is defined as “*a situation due to common or occupational disease or accident in which the worker requires and receives medical assistance and is unable to work*”. It comprises benefits in kind (medical assistance) and monetary compensations (benefits for SA). To be entitled to this subsidy, there must be a part of occupational sickness absence, issued by a family practitioner, generally from the Public Healthcare System, and the successive certification reports, as well as some special requirements of contributions to the Social Security system. If it is caused by occupational accident or disease, this medical leave is issued by the physicians ascribed to the Insurance Companies linked to the Social Security system. The maximum duration of such leave is 365 days, which can be extended for another 180 days if the recovery and return of the worker to the workplace is expected in that time.

With respect to the rest of countries of the Organisation for Economic Co-operation and Development (OECD), Spain is in an intermediate position regarding the SA days per worker/year. Mexico is in the highest position with 27.7 days, whereas Chile, in the lowest position, has 7.3 days. Spain has an average of 10.3 days, which is similar to the level of Austria and the Netherlands (10 days) (<https://stats.oecd.org/index.aspx?queryid=30123>)

The total financial cost of SA in the consolidated Social Security budgets for 2019 in Spain reached 11,554,711.16 euros, which is 8.89% of the general Social Security budget<sup>1</sup>. This percentage, *per se*, demonstrates the importance of properly knowing the diagnosis, the characteristics of the workers and the work activities that generate the SA. The importance of SA caused by disease or accident is not only determined by the social and financial costs that each State dedicates to it<sup>2</sup>, but also by the resources that employers assign to it<sup>3</sup>, as well as the productivity losses<sup>4</sup> and the deterioration of these workers' health<sup>5</sup>. It has been reported that work absenteeism due to illness is, in itself, a risk factor to fall sick, new periods of SA, unemployment, permanent disability pension<sup>5-7</sup>, social exclusion<sup>8</sup> and death<sup>9-11</sup>. Long SA periods generate both an early retirement from the job market, a slower salary increase and an impoverishment of household wealth<sup>5,6-8</sup>.

Few studies at the national level describe the current situation of such benefits in our country; to date, the studies found in the literature related to this topic describe it partially, in some provinces or specific areas<sup>12</sup>, about some specific diseases<sup>13</sup> or specific groups of workers<sup>14</sup>.

The general objective of this study is to provide a wide and thorough description of SA in Spain, focusing on the different regions of the country and stressing on the main characteristics, thus generating a global view of this benefit.

The specific objectives would be the description of the incidence, prevalence and average duration of SA and the description of the main diseases and economic activities that generate the most situations of SA in Spain.

## MATERIAL AND METHODS

This study was carried out using the statistical databases provided by the Spanish Institute of Social Security (INSS), which are published in the website of this organisation ([www.seg-social.es/wps/portal/wss/internet/EstadisticasPresupuestosEstudios/](http://www.seg-social.es/wps/portal/wss/internet/EstadisticasPresupuestosEstudios/)), and databases obtained from specific programs used by the Medical Units.

The reference population was formed by all the workers in Spain covered by the Social Security system in the year 2018. The study excluded the SA cases of civil workers, Armed Forces personnel and workers of the General Judicial Benefit Society, whose control and management were not an object of study. The sample matches the study population.

The variables used were: age (in ranges), sex, average SA duration, diagnosis and diagnostic group (CIE-10), employee or self-employed, non-professional contingency (common disease or non-work accident) or professional contingency (work accident and professional disease), and occupations with higher SA ranking according to the International Standard Industrial Classification of all Economic Activities (ISIC Rev-4).

The geographical scope of the study was the Autonomous Community.

It is an observational study. The statistical calculations used refer to all the people affiliated with the system, who were entitled to receive the SA benefit (AFI), calculated according to the data provided by the Public Employment Service, the General Treasury of Social Security, INSS and the Social Institute of the Navy.

Incidence: the ratio that calculates the number of SA (MP2R) per 1000 affiliates. To compute the SA, we used the number of real registrations for the benefit (MP2R). Monthly datum:  $MP2R * 1000 / AFI$ . Accumulated datum:  $average(MP2R) * 1000 / AFI$

Prevalence: the ratio that calculates the number of SA processes in force per 1000 affiliates. To compute the processes in force, we used the number of perceivers at the end of the period (MP4). Monthly datum:  $MP4 * 1000 / AFI$ . Accumulated datum:  $average(MP4) * 1000 / AFI$

The mean general duration is the average of all durations per day. The mean duration per age range and sex was calculated by dividing the number of days in SA by the number of workers in SA in that range. We also described the number of workers in SA per 1000 affiliates. We calculated the median and the maximum and minimum values for the average duration per diagnostic chapter, using the statistics software Excel®.

### Patient and public involvement

Anonymised patient data were used in this study. Patients and member of the public were not involved in conducting of the study.



## RESULTS

We analysed a total of 540,045 SA processes by common contingencies and 63,441 SA processes by professional contingencies, which were the ones who had been followed-up by the Medical Units of INSS. The total number of SA in 2018 was 5,146,730 processes. The total covered population is 16,373,239 workers.

### *SA Prevalence*

The national prevalence is 32.98/1000 workers in non-professional contingencies and employees, and 30.48 in self-employed workers. In professional contingencies, the national prevalence is 3.99/1000 workers. It ranges between 27.3 in La Rioja and 40.45 in the Canary Islands in non-professional contingencies and employees. In self-employed workers it ranges between 21.5 in the Balearic Islands and 40.63 in Region of Murcia. In professional contingencies, it ranges from 2.73 in Community of Madrid to 5.51 in Galicia (Table 1).

### *SA incidence*

The national incidence is 24.8 in non-professional contingencies and employees, and 9.51 in self-employed workers. In professional contingencies it is 3.55. Its values range between 12.76 in Extremadura and 36.7 in Catalonia for employees and non-professional contingency; for self-employed workers it ranges between 7.71 in Community of Madrid and 16.46 in Chatered Community of Navarre. In professional contingencies, it ranges from 2.89 in Madrid to 5.15 in the Balearic Islands (Table 1).

### *Average SA duration*

The average duration is 58.67 days (in non-professional contingencies from 38.81 days in employees to 91.38 days in self-employed workers) with a median of 48.53 days. In non-professional contingencies for employees, it ranges between 24.64 days in Chatered Community of Navarre to 67.53 in Extremadura. For self-employed workers, it varies between 55.15 days in Navarra to 112.86 days in Extremadura. In professional contingencies, it ranges from 30.94 days in the Balearic Islands to 50.14 in Cantabria (Table 1).

### *Workers in SA and average duration (age ranges and sex).*

The total number of workers in SA by age and sex is higher in men than in women (Figure 1). According to age range and sex, the number of affiliates in SA is higher in women, except in Castilla-León, Chatered community of Navarre and the Basque Country between 16 and 25 years of age, Principality of Asturias and La Rioja between 26 and 35 years and La Rioja in 36-45 and 46-55 years.

The average duration is also higher in women than in men in all the age ranges, except in Community of Madrid and La Rioja for 16-25 years, and Principality of Asturias, Balearic Islands, Canary Islands, Catalonia and Chatered Community of Navarre in workers over 65 years of age.

In women, the average duration is 58.5 days (minimum 12, maximum 137), with a median of 52 days. In men, the average is 53.08 days (minimum 13, maximum 118), with a median of 44.

### *Average SA duration (diagnostic chapter)*

The average SA duration, in general, is 56.82 days, with a median of 52.80 days. In all the Autonomous Communities, the longest duration corresponds to neoplasms, followed by heart diseases and mental disorders. The shortest duration corresponds to infectious diseases (Table 2).

### ***SA situations by International Classification Diseases 10 (ICD-10) diagnosis***

Table 3 describes the main diagnoses that generate the largest numbers of SA cases (ranking of the leading 8 diagnoses). The most frequent diagnoses are: “*Influenza, virus not indentified*”, “*Lower back pain*” and “*Noninfective gastroenteritis and colitis, unspecified*”.

### ***SA situations by International Standard Industrial Classification of all Economic Activities (ISIC Rev-4)***

There is an outstanding number of SA situations in “*General public administration activities*”, “*Hospital activities*”, “*Retail sale in non-specialized stores with food, beverages or tobacco predominating*” and “*General cleaning of buildings*” (Table 4).

## **DISCUSSION**

The obtained results confirm many of the findings described by other authors at both the national and international levels.

The incidence and prevalence are much higher in common contingencies (non-professional cause) than in professional contingencies, which is logical, since professional contingencies only include the accidents occurred in the workplace, as well as the professional diseases described in the Royal Decree 1299/2006 of November 10<sup>th</sup>, and not all diseases, accidents and injuries that any worker can suffer. The prevalence shows an increasing trend in time when compared to other studies carried out in Spain<sup>3,15</sup>, in line with the upward tendency of SA in other countries near Spain in the last decades<sup>16</sup>, whereas other authors reported its stabilisation<sup>2</sup>.

There is a significant difference between the incidence of employees and that of self-employed workers, which is much higher in the former. This is in line with the results obtained in other studies conducted in Spain<sup>3</sup> and at an international level<sup>6,17,18</sup>.

The average duration shows a clear difference between employees and self-employed workers, being longer in self-employed workers. This finding is in line with that of other studies at the national<sup>3</sup> and European<sup>17</sup> level. Non-professional contingencies show a longer duration with respect to professional contingencies, which has remained like this for years<sup>12</sup>.

The differences observed in the number of employees regarding age and sex are in line with the patterns obtained in other studies, with higher incidence<sup>16</sup> and longer duration<sup>18</sup> in women. There is a sex breach in some European countries (Spain, Ireland, France, Belgium and United Kingdom) compared to others (Netherlands, Portugal and Italy)<sup>19,20</sup>. The incidence increases with age, which is in agreement with most studies at the national<sup>3,21</sup> and international<sup>6,16,19,20-22</sup> level, with higher intensity according to the number of affiliates per sex and age range (Table 2). Among the multiple explanations for this fact, it is worth highlighting the following: the double work women usually carry out, i.e., payed work and domestic work, with greater responsibilities with respect to the family (traditional gender role)<sup>20,22</sup>, the different behaviour of women toward disease<sup>20</sup>, their greater morbidity related to maternity<sup>23</sup> and more fragile health, as well as their lower commitment to work<sup>20</sup>. Other authors highlight the occupational differences, which could explain more than half of the gender differences<sup>22</sup>, as well as the stress level<sup>22</sup>. However, this gender breach is not constant in the long term in all the

1  
2  
3 European countries<sup>20,21</sup>; in fact, some studies question its existence based on the  
4 occupational level<sup>24</sup> and the stress level<sup>25</sup>.

6 SA increases with age, especially its duration (Table2), in all the Autonomous  
7 Communities. This finding is in line with most studies at the national<sup>12,26</sup> and  
8 international level<sup>27</sup>.

10 The longest duration by diagnostic group is in oncological diseases, cardiovascular  
11 diseases and mental disorders, which is in line with other studies<sup>28-30</sup>. Moreover, this  
12 fact poses a serious problem of public health, given the accelerated increase of chronic  
13 diseases in all the countries around Spain<sup>31</sup>, with the consequent increase in the  
14 incidence and duration of SA and the cost that it implies<sup>3,28</sup>.

17 The diagnosis that generates the largest number of SA cases, after the flu, is “*lower  
18 back pain*”. This finding is in line with numerous studies, being, globally, the main  
19 diagnosis of sick leave due to its high incidence and recurrence rate<sup>32,33</sup>, as well as to the  
20 duration<sup>21,34,35</sup> and economic costs of such sick leaves<sup>35</sup>. This is due to the great  
21 prevalence of such pathology, regardless of whether or not it generates SA cases<sup>33,36</sup>,  
22 among other factors.

25 The frequency of SA, as a function of the economic activity carried out by the worker,  
26 shows a clear disagreement with other studies, since workers of the Public  
27 Administration are in the 1<sup>st</sup>, 2<sup>nd</sup> and 3<sup>rd</sup> positions in the described ranking in almost all  
28 the Autonomous Communities. This could be explained by the difference between  
29 workers of the public sector, who represent a greater number of SA cases than  
30 employees in the private sector, as in other countries<sup>17,37,38</sup>. However, in previous  
31 studies carried out in Spain, the Public Administration did not represent or occupied  
32 such an important place in terms of SA frequency, being greatly surpassed by the  
33 industrial and construction sectors<sup>14,39</sup>.

### 37 **Conclusion**

39 Our study has important strengths, such as its thoroughness and wide representativeness  
40 of the whole of SA cases in Spain. Since it is a transversal study, it did not allow  
41 drawing conclusions about causality or relationships between the different variables;  
42 therefore, it would be interesting to carry out further studies that analyse the main  
43 factors that influence SA in Spain.

46 **Acknowledgments:** We would like to thank National Institute of Social Security for  
47 helping with the databases.

50 **Contributorship statement:** MLAJ, MJAB, NMM, MTLM and RMV conceived the  
51 original proposal and drafted the original manuscript. MLAJ, MJAB, NMM and RMV  
52 contributed to the development and refinement and statistical analysis of the protocol.  
53 All authors critically appraised the drafted manuscript and made important intellectual  
54 contributions to the writing. All authors have read and approved the final submitted  
55 manuscript.

58 **Funding:** The University of Malaga through a predoctoral grant supports MLAJ, a PhD  
59 student at the University.

**Conflicts of Interest:** All the authors declare that they have no conflict of interest.

**Patient consent for publication** Not required

**Data sharing statement:** All data relevant to the study are included in the article. Data are available in a public, open access repository:

[www.seg-social.es/wps/portal/wss/internet/EstadisticasPresupuestosEstudios/](http://www.seg-social.es/wps/portal/wss/internet/EstadisticasPresupuestosEstudios/)

## REFERENCES

1. Ministerio de Trabajo M y SS. Presupuestos de la Seguridad Social [Internet] 2019; 276–287. [www.seg-social.es/wps/wcm/connect/wss/3187c9a6-0e4d-419b-a9f7-ea99bf3ce4e8/SVT01PRO2018P.pdf?MOD=AJPERES&CVID=\(accessed 3 nov 2019\)](http://www.seg-social.es/wps/wcm/connect/wss/3187c9a6-0e4d-419b-a9f7-ea99bf3ce4e8/SVT01PRO2018P.pdf?MOD=AJPERES&CVID=(accessed 3 nov 2019))
2. Lusinyan L, Bonato L. Work absence in Europe. *IMF Staff Pap* 2007; 54: 475–538 .
3. Alba-Ramírez A. La incapacidad temporal para el trabajo: análisis económico de su incidencia y su duración. *Univ Carlos III Madrid* 2009:1-150.
4. Peña Longobardo LM, Aranda Reneo I, Oliva-Moreno J, et al. Evaluación de las pérdidas laborales provocadas enfermedades y lesiones en España en el año 2009. *Rev Evaluación Programas y Políticas Públicas* 2016; 1: 66-85 .
5. Helgesson M, Johansson B, Nordqvist T, et al. Sickness absence at a young age and later sickness absence, disability pension, death, unemployment and income in native Swedes and immigrants. *Eur J Public Health* 2015; 25: 688–692.
6. Virtanen M, Kiwiimäki M, Vathera J, et al. Sickness absence as a risk factor for job termination, unemployment, and disability pension among temporary and permanent employees. *Occup Environ Med* 2006; 63: 212–217.
7. Salonen L, Blomgren J, Laaksonen M, et al. Sickness absence as a predictor of disability retirement in different occupational classes: A register-based study of a working-age cohort in Finland in 2007-2014. *BMJ Open* 2018; 8: 1–8.
8. Bryngelson, A. Long-term sickness absence and social exclusion. *Scand J Public Health* 2009; 37: 839–845.
9. Ferrie JE, Vahtera J, Kivimäki M, et al. Diagnosis-specific sickness absence and all-cause mortality in the GAZEL study. *J Epidemiol Community Heal* 2009; 63 (1): 50-55.
10. Kivimäki M, Head J, Ferrie JE, et al. Sickness absence as a global measure of health: Evidence from mortality in the Whitehall II prospective cohort study. *Br Med J* 2003; 327: 364–368.
11. Gjesdal S, Ringdal PR, Haug K, et al. Mortality after long-term sickness absence: Prospective cohort study. *Eur J Public Health* 2008; 18: 517–521.
12. Benavides FG, Torá I, Miguel J, et al. Evaluación de la gestión de los casos de incapacidad temporal por contingencia común de más de 15 días en Cataluña. *Gac Sanit* 2010; 24: 215–219.
13. Vicente MT, Terradillos MJ, Capdevilla LM, et al. Sick leaves caused by psychiatric diseases in Spain during 2011. *Rev Med Chil* 2013; 141: 248–254.
14. Benavides FG, Plana M, Serra C, et al. Return to Work After a Non-Work Related Sick

- 1  
2  
3 Spell: The Role of Age, Sex, Economic Activity and Autonomous Community. *Original*  
4 2007; 81: 183–190.  
5  
6 15. Vicente JM. La Incapacidad laboral como indicador de gestión sanitaria. *Med Segur*  
7 *Trab* 2015; 61: 207–219.  
8  
9 16. Livanos L, Zangelidis A. Sickness Absence: A Pan-European Study. *Munich Pers*  
10 *RePEc Arch* 2010; (22627)  
11  
12 17. Rosta J, Tellnes G, Aasland OG. Differences in sickness absence between self-employed  
13 and employed doctors: A cross-sectional study on national sample of Norwegian doctors  
14 in 2010. *BMC Health Serv Res* 2014; 14: 1–8.  
15  
16 18. Alba-Ramírez A; López-Mourelo E. Sickness absence from work in Spain: Are there  
17 gender differences? *UC3M Work Pap* 2017; 15–17.  
18  
19 19. Pekkala J, Blomgren J, Pietiläinen O, et al. Occupational class differences in long  
20 sickness absence: A register-based study of 2.1 million Finnish women and men in 1996-  
21 2013. *BMJ Open* 2017; 7: 1–8.  
22  
23 20. Mastekaasa A. The gender gap in sickness absence: Long-term trends in eight European  
24 countries. *Eur. J. Public Health* 2014; 24: 656–662.  
25  
26 21. Álvarez E, Llergo A, Vaquero M. Análisis de la duración de los periodos de incapacidad  
27 temporal por procesos en Andalucía. Factores asociados. *Aten Primaria* 2009; 41: 387–  
28 393.  
29  
30 22. Laaksonen M, Mastekaasa A, Martikainen P, et al. Gender differences in sickness  
31 absence - The contribution of occupation and workplace. *Scand J Work Environ Heal*  
32 *2010*; 36: 394–403.  
33  
34 23. Ariansen AMS. Age, occupational class and sickness absence during pregnancy: A  
35 retrospective analysis study of the norwegian population registry. *BMJ Open* 2014; 4:1–  
36 9.  
37  
38 24. Løset GK, Dale-Olsen H, Hellevik T, et al. Gender equality in sickness absence  
39 tolerance: Attitudes and norms of sickness absence are not different for men and women.  
40 *PLoS One* 2018; 13: 1–18.  
41  
42 25. Mastekaasa A, Melsom AM. Occupational segregation and gender differences in  
43 sickness absence : Evidence from 17 European countries. *European Commission EU*  
44 *LFS* 2008; (187928).  
45  
46 26. Catalina C, Pastrana JI, Tenas MJ, et al. Long-term sickness absence due to adjustment  
47 disorder. *Occup Med (Chic. Ill)* 2012; 62; 375–378.  
48  
49 27. Gustafsson K, Alexanderson K, Staffan M, et al. Disability, sickness, and unemployment  
50 benefits among long-term sickness absentees five years before, during, and after a  
51 multidisciplinary medical assessment. *J Multidiscip Healthc* 2011; 4: 25-31.  
52  
53 28. Ármannsdóttir B, Mårdby AC, Haukenes I, et al. Cumulative incidence of sickness  
54 absence and disease burden among the newly sick-listed, a cross-sectional population-  
55 based study. *BMC Public Health* 2013; 13: 329-339.  
56  
57 29. Zhang W, McLeod C, Koehoorn M. The relationship between chronic conditions and  
58 absenteeism and associated costs in Canada. *Scand J Work Environ Heal* 2016; 42: 413–  
59 422.  
60  
61 30. Jakovljevic M, Malmose-Stapelfeldt C, et al. Disability, Work Absenteeism, Sickness  
Benefits, and Cancer in Selected European OECD Countries—Forecasts to 2020. *Front*  
*Public Heal* 2017; 5: 1–8.

- 1  
2  
3 31. Nexø MA, Carlsen K, Pedersen J, *et al.* Long-term sickness absence of 32 chronic  
4 conditions: A Danish register-based longitudinal study with up to 17 years of follow-up.  
5 *BMJ Open* 2018; 8: 1–10.  
6  
7 32. Roelen CAM, Koopmans PC, Anema JR, *et al.* Recurrence of medically certified  
8 sickness absence according to diagnosis: A sickness absence register study. *J Occup*  
9 *Rehabil* 2010; 20: 113–121.  
10  
11 33. Hestbaek L, Leboeuf-Yde C, Manniche C. Low back pain: what is the long-term course?  
12 A review of studies of general patient populations. *Eur Spine J* 2003; 12: 149–165.  
13  
14 34. Steenstra IA, Verbeek JH, Heymans MW, *et al.* Prognostic factors for duration of sick  
15 leave in patients sick listed with acute low back pain: A systematic review of the  
16 literature. *Occup Environ Med* 2005; 62: 851–860.  
17  
18 35. Diaz-Ledezma C, Urrutia J, Romeo J, *et al.* Factors associated with variability in length  
19 of sick leave because of acute low back pain in Chile. *Spine J* 2009; 9: 1010–1015.  
20  
21 36. Crook J, Milner R, Schultz IZ, *et al.* Determinants of occupational disability following a  
22 low back injury: A critical review of the literature. *J Occup Rehabil* 2005; 12: 169–189.  
23  
24 37. Oke A, Braithwaite P, Antai D. Sickness absence and precarious employment: A  
25 comparative cross-national study of Denmark, Finland, Sweden, and Norway. *Int J*  
26 *Occup Environ Med* 2016; 7: 125–147.  
27  
28 38. Alexopoulos EC, Merakoulis G, Tanagra D, *et al.* Sickness absence in the private sector  
29 of Greece: Comparing shipyard industry and national insurance data. *Int J Environ Res*  
30 *Public Health* 2012; 9: 1171–1181.  
31  
32 39. Benavides FG, Zaballa E, Sanchez-Niubo A, *et al.* Incidence of non-work-related  
33 sickness absence in Spain by economic activity of the company. *Arch Prev Riesgos*  
34 *Labor* 2017; 20: 14–25.  
35

### Table legends

- 36  
37  
38  
39  
40 Table 1: Prevalence, incidence and average duration of sickness absence in Spain (2018)  
41  
42 Table 2: Sickness absence and average duration, by age and sex  
43  
44 Table 3: Average duration by diagnosis chapter (ICD-10)  
45  
46 Table 4: Sickness absence situations by specific diagnosis (ICD-10)  
47  
48 Table 5: Sickness absence situations by economic activity (International Standard Industrial  
49 Classification of all Economic Activities, ISIC Rev-4)  
50  
51  
52  
53  
54  
55  
56  
57  
58  
59  
60

Table 1: Prevalence, incidence and average duration of sickness absence in Spain (2018)

|                               | PREVALENCIA     |               |                 | INCIDENCIA      |               |                 | DURACION MEDIA  |               |                 |
|-------------------------------|-----------------|---------------|-----------------|-----------------|---------------|-----------------|-----------------|---------------|-----------------|
|                               | NO PROFESIONAL  |               | PROFESIONA<br>L | NO PROFESIONAL  |               | PROFESIONA<br>L | NO PROFESIONAL  |               | PROFESIONA<br>L |
|                               | CUENTA<br>AJENA | AUTONOMO<br>S |                 | CUENTA<br>AJENA | AUTONOMO<br>S |                 | CUENTA<br>AJENA | AUTONOMO<br>S |                 |
| <b>ANDALUCIA</b>              | 29,41           | 31,43         | 4,26            | 19,72           | 9,28          | 3,98            | 44,79           | 98,35         | 37,24           |
| <b>ARAGON</b>                 | 32,52           | 30,48         | 3,94            | 25,95           | 11,15         | 3,39            | 36,47           | 75,45         | 41,45           |
| <b>ASTURIAS</b>               | 36              | 38,96         | 5,01            | 18,73           | 10,85         | 3,53            | 58,55           | 105,03        | 47,08           |
| <b>ILLES BALEARS</b>          | 31,29           | 21,7          | 4,72            | 27,02           | 6,46          | 5,15            | 33,02           | 84,01         | 30,94           |
| <b>CANARIAS</b>               | 40,45           | 26,45         | 3,85            | 25,23           | 7,96          | 3,51            | 48,53           | 100,87        | 38,17           |
| <b>CANTABRIA</b>              | 39,77           | 38,68         | 4,84            | 23,38           | 10,92         | 3,18            | 51,39           | 108,36        | 50,14           |
| <b>CASTILLA Y LEON</b>        | 32,68           | 31,71         | 4,35            | 19,46           | 9,15          | 3,44            | 47,95           | 95,36         | 42,07           |
| <b>CASTILLA-LA<br/>MANCHA</b> | 32,4            | 35,57         | 4,48            | 19,91           | 9,93          | 3,96            | 46,02           | 98,54         | 38,08           |
| <b>CATALUÑA</b>               | 35,14           | 28,76         | 3,8             | 36,37           | 10,17         | 3,6             | 28,54           | 83,48         | 36,06           |
| <b>EXTREMADURA</b>            | 31,59           | 38,9          | 4,64            | 12,76           | 8,94          | 3,68            | 67,53           | 112,86        | 41,42           |
| <b>GALICIA</b>                | 39,79           | 44,29         | 5,51            | 18,52           | 10,54         | 3,57            | 61,39           | 111,82        | 49,83           |
| <b>MADRID</b>                 | 29,17           | 20,79         | 2,73            | 25,54           | 7,71          | 2,89            | 33,89           | 77,75         | 33,11           |
| <b>MURCIA</b>                 | 35,55           | 40,63         | 4,12            | 20,21           | 11,33         | 3,39            | 48,39           | 98,49         | 40,2            |
| <b>NAVARRA</b>                | 35,73           | 30,72         | 4,28            | 43,87           | 16,46         | 3,88            | 24,64           | 55,15         | 37,86           |
| <b>LA RIOJA</b>               | 27,3            | 25,65         | 4,41            | 25,28           | 10,91         | 3,91            | 34,53           | 69,95         | 38,87           |
| <b>VALENCIA</b>               | 30,68           | 29,28         | 4,4             | 18,06           | 8,79          | 3,34            | 49,29           | 96,3          | 42,34           |

|                       |       |       |      |       |       |      |       |       |       |
|-----------------------|-------|-------|------|-------|-------|------|-------|-------|-------|
| <b>PAIS VASCO</b>     | 39,58 | 28,3  | 3,84 | 31,15 | 10,52 | 3,96 | 38,16 | 79,6  | 36,55 |
| <b>TOTAL NACIONAL</b> | 32,98 | 30,48 | 3,99 | 24,98 | 9,51  | 3,55 | 38,81 | 91,38 | 38,23 |

|                                | PREVALENCE                      |                       |                            | INCIDENCE                       |                       |                            | AVERAGE DURATION                |                       |                            |
|--------------------------------|---------------------------------|-----------------------|----------------------------|---------------------------------|-----------------------|----------------------------|---------------------------------|-----------------------|----------------------------|
|                                | NON- PROFESSIONAL CONTINGENCIES |                       | PROFESSIONAL CONTINGENCIES | NON- PROFESSIONAL CONTINGENCIES |                       | PROFESSIONAL CONTINGENCIES | NON- PROFESSIONAL CONTINGENCIES |                       | PROFESSIONAL CONTINGENCIES |
|                                | EMPLOYEES WORKERS               | SELF-EMPLOYED WORKERS |                            | EMPLOYEES WORKERS               | SELF-EMPLOYED WORKERS |                            | EMPLOYEES WORKERS               | SELF-EMPLOYED WORKERS |                            |
| ANDALUSIA                      | 29,41                           | 31,43                 | 4,26                       | 19,72                           | 9,28                  | 3,98                       | 44,79                           | 98,35                 | 37,24                      |
| ARAGON                         | 32,52                           | 30,48                 | 3,94                       | 25,95                           | 11,15                 | 3,39                       | 36,47                           | 75,45                 | 41,45                      |
| PRINCIPALITY of ASTURIAS       | 36                              | 38,96                 | 5,01                       | 18,73                           | 10,85                 | 3,53                       | 58,55                           | 105,03                | 47,08                      |
| BALEARIC ISLANDS               | 31,29                           | 21,7                  | 4,72                       | 27,02                           | 6,46                  | 5,15                       | 33,02                           | 84,01                 | 30,94                      |
| CANARY ISLANDS                 | 40,45                           | 26,45                 | 3,85                       | 25,23                           | 7,96                  | 3,51                       | 48,53                           | 100,87                | 38,17                      |
| CANTABRIA                      | 39,77                           | 38,68                 | 4,84                       | 23,38                           | 10,92                 | 3,18                       | 51,39                           | 108,36                | 50,14                      |
| CASTILE and LEON               | 32,68                           | 31,71                 | 4,35                       | 19,46                           | 9,15                  | 3,44                       | 47,95                           | 95,36                 | 42,07                      |
| CASTILE LA MANCHA              | 32,4                            | 35,57                 | 4,48                       | 19,91                           | 9,93                  | 3,96                       | 46,02                           | 98,54                 | 38,08                      |
| CATALONIA                      | 35,14                           | 28,76                 | 3,8                        | 36,37                           | 10,17                 | 3,6                        | 28,54                           | 83,48                 | 36,06                      |
| EXTREMADURA                    | 31,59                           | 38,9                  | 4,64                       | 12,76                           | 8,94                  | 3,68                       | 67,53                           | 112,86                | 41,42                      |
| GALICIA                        | 39,79                           | 44,29                 | 5,51                       | 18,52                           | 10,54                 | 3,57                       | 61,39                           | 111,82                | 49,83                      |
| COMMUNITY of MADRID            | 29,17                           | 20,79                 | 2,73                       | 25,54                           | 7,71                  | 2,89                       | 33,89                           | 77,75                 | 33,11                      |
| MURCIA                         | 35,55                           | 40,63                 | 4,12                       | 20,21                           | 11,33                 | 3,39                       | 48,39                           | 98,49                 | 40,2                       |
| CHARTERED COMMUNITY of NAVARRA | 35,73                           | 30,72                 | 4,28                       | 43,87                           | 16,46                 | 3,88                       | 24,64                           | 55,15                 | 37,86                      |



|                       |       |       |      |       |       |      |       |       |       |
|-----------------------|-------|-------|------|-------|-------|------|-------|-------|-------|
| <b>LA RIOJA</b>       | 27,3  | 25,65 | 4,41 | 25,28 | 10,91 | 3,91 | 34,53 | 69,95 | 38,87 |
| <b>VALENCIA</b>       | 30,68 | 29,28 | 4,4  | 18,06 | 8,79  | 3,34 | 49,29 | 96,3  | 42,34 |
| <b>BASQUE COUNTRY</b> | 39,58 | 28,3  | 3,84 | 31,15 | 10,52 | 3,96 | 38,16 | 79,6  | 36,55 |
| <b>NATIONAL TOTAL</b> | 32,98 | 30,48 | 3,99 | 24,98 | 9,51  | 3,55 | 38,81 | 91,38 | 38,23 |

For peer review only

Table 2. Sickness absence and average duration, by age and sex

|                  |                            | ANDALUSIA  |            | ARAGON    |           | P. OF ASTURIAS |           | BALEARIC ISLANDS |           | CANARY ISLANDS |            | CANTABRIA |           | CASTILE AND LEON |            | CASTILE LA MANCHA |            | CATALONIA  |            | EXTREMADURA |           | GALICIA    |            | COMMUNITY OF MADRID |            | REGION OF MURCIA |            | C. C. OF NAVARRE |           | LA RIOJA  |           | VALENCIA   |            | BASQUE COUNTRY |            |
|------------------|----------------------------|------------|------------|-----------|-----------|----------------|-----------|------------------|-----------|----------------|------------|-----------|-----------|------------------|------------|-------------------|------------|------------|------------|-------------|-----------|------------|------------|---------------------|------------|------------------|------------|------------------|-----------|-----------|-----------|------------|------------|----------------|------------|
|                  |                            | Woman      | Man        | Woman     | Man       | Woman          | Man       | Woman            | Man       | Woman          | Man        | Woman     | Man       | Woman            | Man        | Woman             | Man        | Woman      | Man        | Woman       | Man       | Woman      | Man        | Woman               | Man        | Woman            | Man        | Woman            | Man       | Woman     | Man       | Woman      | Man        | Woman          | Man        |
| 16-25            | Total workforce            | 28 519     | 30 319     | 7 211     | 9 576     | 1 836          | 2 100     | 11 010           | 10 470    | 11 404         | 9 813      | 2 235     | 2 292     | 6 859            | 9 934      | 7 294             | 10 106     | 92 204     | 83 921     | 2 064       | 2 793     | 6 082      | 7 549      | 43 592              | 42 510     | 5 649            | 7 818      | 5 488            | 7 886     | 1 457     | 2 034     | 15 154     | 18 327     | 8 401          | 12 209     |
|                  | Average affiliated workers | 68552.40   | 89 788.42  | 12715.03  | 17 792.34 | 5368.35        | 6 294.17  | 16392.26         | 19 260.69 | 19549.26       | 23 478.52  | 3792.28   | 4 566.60  | 16025.01         | 22 400.00  | 13405.17          | 21 951.23  | 112945.81  | 122 308.48 | 7057.99     | 11 732.44 | 17279.67   | 21 582.01  | 81635.82            | 97 705.09  | 13971.74         | 19 847.78  | 6659.14          | 8 653.16  | 2699.60   | 2 696.28  | 46147.56   | 56 875.39  | 17735.00       | 22 613.08  |
|                  | SA/1000 affiliates         | 34.67      | 28.14      | 47.26     | 44.85     | 28.5           | 27.8      | 55.97            | 45.29     | 48.61          | 34.82      | 49.11     | 41.83     | 35.67            | 36.96      | 45.34             | 38.36      | 68.02      | 57.17      | 24.37       | 19.83     | 29.33      | 29.14      | 44.5                | 36.25      | 33.69            | 32.82      | 68.67            | 75.94     | 44.97     | 45.85     | 27.36      | 26.85      | 39.47          | 44.99      |
|                  | Total days of SA           | 834 572    | 846 610    | 131 509   | 167 205   | 50 471         | 56 482    | 185 291          | 178 221   | 309 354        | 231 868    | 48 036    | 48 391    | 167 468          | 222 267    | 309 354           | 242 410    | 1 358 613  | 1 249 511  | 94 375      | 105 025   | 231 248    | 264 978    | 659 008             | 707 760    | 189 971          | 225 126    | 70 415           | 105 159   | 26 249    | 38 326    | 434 028    | 500 328    | 170 994        | 232 766    |
| Average duration | 29                         | 27         | 18         | 17        | 27        | 26             | 16        | 17               | 27        | 23             | 21         | 21        | 24        | 22               | 42         | 23                | 14         | 14         | 45         | 37          | 38        | 35         | 15         | 16                  | 33         | 28               | 12         | 13               | 18        | 18        | 28        | 27         | 20         | 19             |            |
| 26-35            | Total workforce            | 100 886    | 86 518     | 20 411    | 20 921    | 7 876          | 8 438     | 22 333           | 19 262    | 32 182         | 25 520     | 7 126     | 6 214     | 23 829           | 23 851     | 22 958            | 23 179     | 195 844    | 166 163    | 8 168       | 6 905     | 25 440     | 23 811     | 126 980             | 102 745    | 19 347           | 18 506     | 5 488            | 7 886     | 1 457     | 2 034     | 15 154     | 18 327     | 8 401          | 12 209     |
|                  | Average affiliated workers | 300 358.69 | 330 969.33 | 48 943.45 | 55 044.50 | 29 131.98      | 30 748.08 | 51 679.23        | 54 743.11 | 80 321.79      | 82 314.91  | 18 686.80 | 19 468.05 | 73 916.47        | 83 188.54  | 59 795.11         | 75 578.35  | 310 001.82 | 347 500.15 | 36 076.74   | 41 472.33 | 88 778.42  | 92 930.24  | 334 003.39          | 351 427.98 | 53 485.35        | 64 162.37  | 23 761.08        | 27 464.21 | 11 184.28 | 11 558.26 | 169 672.13 | 189 654.50 | 72 276.88      | 83 896.41  |
|                  | SA/1000 affiliates         | 27.93      | 21.78      | 34.75     | 31.67     | 22.53          | 22.87     | 36.01            | 29.32     | 33.39          | 25.84      | 31.78     | 26.60     | 26.86            | 23.89      | 32.00             | 25.55      | 52.65      | 39.85      | 18.87       | 13.87     | 23.88      | 21.35      | 31.68               | 24.36      | 30.14            | 24.04      | 52.48            | 51.62     | 33.13     | 36.82     | 24.45      | 19.81      | 37.83          | 34.70      |
|                  | Total days of SA           | 4 002 601  | 2 741 036  | 613 970   | 475 288   | 326 129        | 321 994   | 596 265          | 434 597   | 1 290 175      | 833 828    | 282 294   | 203 621   | 918 856          | 733 947    | 927 034           | 686 484    | 4 915 171  | 3 405 555  | 475 765     | 307 251   | 1 289 570  | 1 018 756  | 3 636 681           | 2 344 947  | 882 767          | 621 458    | 325 739          | 275 255   | 127 536   | 108 671   | 2 207 518  | 1 512 322  | 1 228 249      | 847 290    |
| Average duration | 39                         | 31         | 30         | 22        | 41        | 38             | 26        | 22               | 40        | 32             | 39         | 32        | 38        | 30               | 40         | 29                | 25         | 20         | 58         | 44          | 50        | 42         | 28         | 22                  | 45         | 33               | 21         | 16               | 28        | 21        | 44        | 33         | 35         | 24             |            |
| 36-45            | Total workforce            | 118 614    | 117 512    | 25 565    | 26 492    | 13 494         | 14 020    | 23 709           | 22 637    | 40 199         | 35 601     | 10 016    | 9 757     | 31 594           | 32 035     | 26 742            | 29 050     | 221 680    | 205 633    | 9 621       | 9 250     | 38 674     | 35 964     | 151 187             | 125 041    | 23 103           | 24 813     | 20 685           | 22 630    | 5 864     | 6 555     | 63 233     | 65 615     | 51 452         | 55 641     |
|                  | Average affiliated workers | 416 547.17 | 493 349.53 | 73 820.89 | 88 587.25 | 53 033.04      | 57 508.87 | 72 634.45        | 79 189.07 | 113 319.60     | 124 332.39 | 31 436.56 | 34 354.87 | 116 512.04       | 134 105.28 | 85 921.38         | 117 415.38 | 467 172.39 | 536 140.86 | 51 846.68   | 57 864.40 | 154 779.30 | 159 073.44 | 448 746.41          | 492 003.79 | 74 900.72        | 103 493.33 | 37 428.06        | 44 884.12 | 18 530.51 | 19 654.64 | 256 013.07 | 308 714.88 | 131 005.73     | 147 561.07 |
|                  | SA/1000 affiliates         | 23.73      | 19.85      | 28.86     | 24.92     | 21.20          | 20.32     | 27.20            | 23.82     | 29.56          | 23.86      | 26.55     | 23.67     | 22.60            | 19.91      | 25.94             | 20.62      | 39.54      | 31.96      | 15.46       | 13.32     | 20.82      | 18.84      | 28.08               | 21.18      | 25.70            | 19.98      | 46.06            | 42.02     | 26.37     | 27.79     | 20.58      | 17.71      | 32.73          | 31.42      |
|                  | Total days of SA           | 5 485 098  | 4 853 604  | 1 017 787 | 884 342   | 729 537        | 710 147   | 871 595          | 690 262   | 1 994 219      | 1 537 765  | 522 237   | 427 368   | 1 601 141        | 1 341 221  | 1 320 806         | 1 180 792  | 7 299 940  | 5 952 905  | 6 840 002   | 5 233 999 | 2 405 243  | 1 925 240  | 5 625 202           | 4 022 176  | 1 271 496        | 1 132 594  | 584 891          | 5 155 333 | 2 168 911 | 1 962 011 | 3 345 778  | 2 905 621  | 2 137 768      | 1 898 819  |
| Average duration | 46                         | 41         | 39         | 33        | 54        | 50             | 36        | 30               | 49        | 43             | 52         | 43        | 50        | 41               | 49         | 40                | 32         | 28         | 71         | 56          | 62        | 53         | 37         | 32                  | 55         | 45               | 28         | 22               | 36        | 29        | 52        | 44         | 41         | 34             |            |
| 46-55            | Total workforce            | 93 419     | 97 446     | 20 531    | 21 134    | 12 107         | 11 379    | 19 560           | 18 340    | 33 484         | 32 340     | 7 739     | 7 993     | 27 137           | 28 786     | 20 740            | 24 528     | 161 373    | 145 283    | 9 133       | 9 654     | 32 304     | 30 656     | 116 428             | 97 152     | 17 870           | 19 928     | 17 679           | 17 432    | 4 652     | 5 523     | 52 477     | 56 490     | 44 669         | 47 083     |
|                  | Average affiliated workers | 376 667.85 | 452 781.53 | 72 642.41 | 86 832.17 | 50 430.1       | 54 182.72 | 59 519.62        | 70 647.25 | 103 329.08     | 124 900.1  | 27 966.17 | 32 274.09 | 121 691.32       | 144 244.47 | 78 676.23         | 113 500.26 | 420 095.39 | 483 766.12 | 4 899.11    | 61 304.89 | 155 675.61 | 146 483    | 392 653.45          | 435 113.09 | 63 760.45        | 88 653.91  | 36 669.67        | 43 790.26 | 16 865.87 | 19 151.91 | 227 708.97 | 286 020.66 | 132 334.79     | 149 918.57 |
|                  | SA/1000 affiliates         | 20.67      | 17.93      | 23.55     | 20.28     | 20.01          | 17.50     | 27.39            | 21.63     | 27.00          | 21.58      | 23.06     | 20.64     | 18.58            | 16.63      | 21.97             | 18.01      | 32.01      | 25.03      | 15.55       | 13.12     | 17.29      | 17.44      | 24.71               | 18.61      | 23.36            | 18.73      | 40.18            | 33.17     | 22.99     | 24.03     | 19.20      | 16.46      | 28.13          | 26.17      |
|                  | Total days of SA           | 5 662 005  | 5 761 219  | 1 161 473 | 1 064 204 | 892 531        | 800 712   | 986 970          | 817 858   | 2 095 638      | 1 869 968  | 514 677   | 492 931   | 1 843 156        | 1 685 686  | 1 338 200         | 1 442 138  | 7 170 290  | 6 146 120  | 7 567 911   | 7 560 888 | 2 592 300  | 2 198 003  | 5 597 323           | 4 348 939  | 1 266 827        | 1 234 944  | 690 509          | 631 366   | 226 762   | 248 332   | 3 621 543  | 3 415 316  | 2 402 084      | 2 300 411  |
| Average duration | 60                         | 59         | 56         | 50        | 73        | 70             | 50        | 44               | 62        | 57             | 66         | 61        | 67        | 58               | 64         | 58                | 44         | 42         | 82         | 78          | 80        | 71         | 48         | 44                  | 70         | 61               | 39         | 36               | 48        | 44        | 69        | 60         | 53         | 48             |            |
| 56-65            | Total workforce            | 54 794     | 55 337     | 13 132    | 12 022    | 9 140          | 7 504     | 11 512           | 9 850     | 16 303         | 15 530     | 5 491     | 5 206     | 18 430           | 19 782     | 11 693            | 14 709     | 85 972     | 74 294     | 6 060       | 6 574     | 22 907     | 19 711     | 67 732              | 53 708     | 11 580           | 11 798     | 9 312            | 8 423     | 2 931     | 3 133     | 33 820     | 33 628     | 2 8812         | 26 181     |
|                  | Average affiliated workers | 225 629.08 | 261 355.04 | 45 478.18 | 56 875.03 | 34 528.21      | 37 293.19 | 34 180.32        | 40 291.24 | 48 415.01      | 64 110.82  | 18 313.97 | 22 216.8  | 81 337.65        | 106 472.69 | 44 685.46         | 72 066.5   | 237 960.81 | 279 504.05 | 30 888.53   | 42 159.4  | 87 344.91  | 92 663.59  | 217 723.25          | 240 497.55 | 35 155.93        | 48 115.93  | 21 505.51        | 26 507.11 | 10 467.84 | 13 056.28 | 12 880.03  | 16 604.89  | 82 120.99      | 95 280.63  |
|                  | SA/1000 affiliates         | 20.24      | 17.64      | 24.06     | 17.61     | 22.06          | 16.77     | 28.07            | 20.37     | 28.06          | 20.19      | 24.99     | 19.53     | 18.88            | 15.48      | 21.81             | 17.01      | 30.11      | 22.15      | 16.35       | 12.99     | 21.85      | 17.73      | 25.93               | 18.61      | 27.45            | 20.43      | 36.08            | 26.48     | 23.33     | 20.00     | 21.88      | 16.87      | 29.24          | 22.90      |
|                  | Total days of SA           | 4 016 323  | 4 392 212  | 954 029   | 886 164   | 799 503        | 654 003   | 722 340          | 644 055   | 1 270 661      | 1 239 034  | 458 470   | 446 106   | 1 611 454        | 1 563 351  | 971 777           | 1 205 977  | 5 269 955  | 4 690 436  | 5 675 700   | 6 314 005 | 2 297 445  | 181 0405   | 4 144 407           | 3 305 759  | 1 026 123        | 969 808    | 47 8852          | 45 7600   | 200 637   | 200 286   | 2 884 959  | 2 773 183  | 2 023 474      | 1 882 291  |
| Average duration | 73                         | 79         | 72         | 73        | 87        | 87             | 62        | 65               | 77        | 79             | 83         | 85        | 87        | 79               | 83         | 81                | 61         | 63         | 95         | 96          | 100       | 91         | 61         | 61                  | 88         | 82               | 51         | 54               | 68        | 63        | 85        | 82         | 70         | 71             |            |

|      |                            |          |          |         |         |         |         |         |         |       |         |         |        |         |         |         |         |          |          |         |         |         |        |          |          |         |         |        |         |        |        |         |         |         |         |
|------|----------------------------|----------|----------|---------|---------|---------|---------|---------|---------|-------|---------|---------|--------|---------|---------|---------|---------|----------|----------|---------|---------|---------|--------|----------|----------|---------|---------|--------|---------|--------|--------|---------|---------|---------|---------|
|      | Total workforce            | 1009     | 912      | 218     | 229     | 143     | 135     | 248     | 248     | 405   | 507     | 93      | 90     | 309     | 369     | 222     | 243     | 1499     | 1783     | 109     | 118     | 496     | 416    | 1427     | 1472     | 209     | 205     | 97     | 99      | 48     | 53     | 565     | 586     | 395     | 395     |
|      | Average affiliated workers | 11950,42 | 13802,04 | 2562,05 | 3147,87 | 2035,13 | 1864,38 | 2749,35 | 3794,28 | 3761  | 6238,89 | 1063,87 | 1151,9 | 4800,68 | 6608,46 | 2729,33 | 3896,45 | 16654,52 | 21595,24 | 1635,76 | 2118,84 | 6019,34 | 6010,7 | 14815,19 | 17812,54 | 2137,48 | 2850,03 | 976,63 | 1251,16 | 558,86 | 884,86 | 7419,14 | 9562,67 | 3943,04 | 4299,16 |
| > 65 | SA/1000 affiliates         | 7,04     | 5,51     | 7,09    | 6,06    | 5,86    | 6,03    | 7,52    | 5,45    | 8,97  | 6,77    | 7,28    | 6,51   | 5,36    | 4,65    | 6,78    | 5,20    | 7,50     | 6,88     | 5,55    | 4,64    | 6,87    | 5,77   | 8,03     | 6,89     | 8,15    | 5,99    | 8,28   | 6,59    | 7,16   | 4,99   | 6,35    | 5,11    | 8,35    | 7,66    |
|      | Total days of SA           | 102994   | 86720    | 22938   | 20767   | 14254   | 15093   | 19474   | 21387   | 42070 | 54105   | 9941    | 8986   | 33554   | 36135   | 30606   | 23582   | 137904   | 164426   | 14652   | 13172   | 60119   | 49220  | 115468   | 116354   | 28423   | 19951   | 7095   | 8826    | 5266   | 4674   | 63313   | 59850   | 38371   | 34999   |
|      | Average duration           | 102      | 95       | 105     | 90      | 99      | 111     | 78      | 86      | 103   | 106     | 106     | 99     | 108     | 97      | 137     | 97      | 91       | 92       | 134     | 111     | 121     | 118    | 80       | 79       | 135     | 97      | 73     | 89      | 109    | 88     | 112     | 102     | 97      | 88      |

Table 3. Average duration by diagnosis chapter (ICD-10)

| Diagnosis chapter <sup>(1)</sup>                                                                               | Average duration (days) | Minimun duration (Autonomous Community) | Maximun duration (Autonomous Community) |
|----------------------------------------------------------------------------------------------------------------|-------------------------|-----------------------------------------|-----------------------------------------|
| <b>I Certain infectious and parasitic diseases</b>                                                             | 9,65                    | 3,87 (Navarre)                          | 17,39 (Galicia)                         |
| <b>II Neoplasms</b>                                                                                            | 117,59                  | 87,92 (C. of Madrid)                    | 142,86 (Basque Country)                 |
| <b>III Diseases of the blood and blood-forming organs and certain disorders involving the immune mechanism</b> | 79,58                   | 40,50 (Navarre)                         | 121,10 (Extremadura)                    |
| <b>IV Endocrine, nutritional and metabolic diseases</b>                                                        | 67,22                   | 43,03 (Navarre)                         | 88,73 (Galicia)                         |
| <b>V Mental and behavioural disorders</b>                                                                      | 92,03                   | 56,11 (Balearic Islands)                | 116,66 (Basque Country)                 |
| <b>VI Diseases of the nervous system</b>                                                                       | 67,02                   | 26,40 (Navarre)                         | 95,84 (Galicia)                         |
| <b>VII Diseases of the eye and adnexa</b>                                                                      | 40,35                   | 18,80 (Navarre)                         | 56,76 (Extremadura)                     |
| <b>VIII Diseases of the ear and mastoid process</b>                                                            | 28,94                   | 13,85 (Navarre)                         | 47,66 (Extremadura)                     |
| <b>IX Diseases of the circulatory system</b>                                                                   | 98,8                    | 76,86 (C. of Madrid)                    | 119,39 (Basque Country)                 |
| <b>X Diseases of the respiratory system</b>                                                                    | 12,09                   | 6,40 (Navarre)                          | 19,76 (Extremadura)                     |
| <b>XI Diseases of the digestive system</b>                                                                     | 35,48                   | 14,97 (Navarre)                         | 50,51 (Extremadura)                     |
| <b>XII Diseases of the skin and subcutaneous tissue</b>                                                        | 35,55                   | 20,61 (Navarre)                         | 51,91 (Basque Country)                  |
| <b>XIII Diseases of the musculoskeletal system and connective tissue</b>                                       | 68,5                    | 43,11 (Navarre)                         | 92,61 (Basque Country)                  |
| <b>XIV Diseases of the genitourinary system</b>                                                                | 36,04                   | 15,56 (Navarre)                         | 52,86 (Basque Country)                  |
| <b>XV Pregnancy, childbirth and the puerperium</b>                                                             | 64,37                   | 51,51 (P of Asturias)                   | 81,32 (Canary Islands)                  |
| <b>XVII Congenital malformations, deformations and chromosomal abnormalities</b>                               | 81,25                   | 37,76 (La Rioja)                        | 121,65 (Canary Islands)                 |

|                                                                                                      |       |                 |                          |
|------------------------------------------------------------------------------------------------------|-------|-----------------|--------------------------|
| <i>XVIII Symptoms, signs and abnormal clinical and laboratory findings, not elsewhere classified</i> | 32,19 | 9,05 (Navarre)  | 51,18 (Region of Murcia) |
| <i>XIX Injury, poisoning and certain other consequences of external causes</i>                       | 60,96 | 45,13 (Navarre) | 81,27 (Basque Country)   |

(1) Chapters XX, XXI y XXII are not included because the number of cases is not significant

For peer review only

Table 4. Sickness absence situations by specific diagnosis (ICD-10)

| Autonomous Community of Spain   | Code          | Specific diagnosis                                                       | Sickness absence situations                           |
|---------------------------------|---------------|--------------------------------------------------------------------------|-------------------------------------------------------|
| <b>Andalusia</b>                | M54.5         | Low back pain                                                            | 41.884                                                |
|                                 | K52           | Other noninfective gastroenteritis and colitis                           | 30.794                                                |
|                                 | J00           | Acute nasopharyngitis (common cold)                                      | 25.633                                                |
|                                 | J11           | Influenza, virus not indentified                                         | 25.345                                                |
|                                 | M54.2         | Cervicalgia                                                              | 17.463                                                |
|                                 | M54.3         | Sciatica                                                                 | 16.141                                                |
|                                 | J02.9         | Acute pharyngitis, unspecified                                           | 12.318                                                |
|                                 | J03.9         | Acute tonsillitis, unspecified                                           | 11.617                                                |
|                                 | <b>Aragon</b> | K52.9                                                                    | Noninfective gastroenteritis and colitis, unspecified |
| J11                             |               | Influenza, virus not indentified                                         | 8.383                                                 |
| M54.5                           |               | Low back pain                                                            | 7.565                                                 |
| J02.9                           |               | Acute pharyngitis, unspecified                                           | 6.373                                                 |
| M25                             |               | Other joint disorders, not elsewhere classified                          | 4.952                                                 |
| M54.3                           |               | Sciatica                                                                 | 2.743                                                 |
| M54.2                           |               | Cervicalgia                                                              | 2.693                                                 |
| F41                             |               | Other anxiety disorders                                                  | 2.487                                                 |
| <b>Principality of Asturias</b> | K52.9         | Noninfective gastroenteritis and colitis, unspecified                    | 4.362                                                 |
|                                 | M54.5         | Low back pain                                                            | 3.485                                                 |
|                                 | F41           | Other anxiety disorders                                                  | 3.369                                                 |
|                                 | J11           | Influenza, virus not indentified                                         | 2.311                                                 |
|                                 | M54.3         | Sciatica                                                                 | 1.937                                                 |
|                                 | M54.2         | Cervicalgia                                                              | 1.706                                                 |
|                                 | J02.9         | Acute pharyngitis, unspecified                                           | 1.256                                                 |
|                                 | M23           | Internal derangement of knee                                             | 1.237                                                 |
| <b>Balearic Islands</b>         | K52.9         | Noninfective gastroenteritis and colitis, unspecified                    | 11.331                                                |
|                                 | M54.5         | Low back pain                                                            | 7.985                                                 |
|                                 | B97.8         | Other viral agents as the cause of diseases classified to other chapters | 6.260                                                 |
|                                 | J11           | Influenza, virus not indentified                                         | 5.697                                                 |
|                                 | F41.9         | Anxiety disorder, unspecified                                            | 3.787                                                 |
|                                 | J03.9         | Acute tonsillitis, unspecified                                           | 3.578                                                 |
|                                 | J00           | Acute nasopharyngitis (common cold)                                      | 2.990                                                 |
|                                 | M54.3         | Sciatica                                                                 | 2.949                                                 |
| <b>Canary Islands</b>           | M54.5         | Low back pain                                                            | 13.145                                                |
|                                 | J11           | Influenza, virus not indentified                                         | 10.897                                                |
|                                 | K52.9         | Noninfective gastroenteritis and colitis, unspecified                    | 9.554                                                 |
|                                 | J00           | Acute nasopharyngitis (common cold)                                      | 7.704                                                 |
|                                 | J20.9         | Acute bronchitis, unspecified                                            | 5.579                                                 |
|                                 | F06.4         | Organic anxiety disorder                                                 | 5.330                                                 |
|                                 | M54.3         | Sciatica                                                                 | 4.744                                                 |

|                          |       |                                                                                |        |
|--------------------------|-------|--------------------------------------------------------------------------------|--------|
|                          | M54.2 | Cervicalgia                                                                    | 4.147  |
| <b>Cantabria</b>         | K52.9 | Noninfective gastroenteritis and colitis, unspecified                          | 4.078  |
|                          | J11   | Influenza, virus not indentified                                               | 2.811  |
|                          | M54.5 | Low back pain                                                                  | 2.440  |
|                          | R45   | Symtoms and signs involving emotional state                                    | 1.723  |
|                          | J02.9 | Acute pharyngitis, unspecified                                                 | 1.679  |
|                          | J06   | Accute upper respiratory infections of multiple and unspecified sites          |        |
|                          | M54.3 | Sciatica                                                                       | 1.522  |
|                          | M54.2 | Cervicalgia                                                                    | 1.433  |
| <b>Castile and Leon</b>  | K52   | Other noninfective gastroenteritis and colitis                                 | 1.042  |
|                          | M54.5 | Low back pain                                                                  | 13.570 |
|                          | J11   | Influenza, virus not indentified                                               | 9.100  |
|                          | F41.9 | Anxiety disorder, unspecified                                                  | 5.606  |
|                          | M54.3 | Sciatica                                                                       | 5.524  |
|                          | J98.8 | Other specified respiratory disorders                                          | 4.259  |
|                          | J06.9 | Acute upper respiratory infection, unspecified                                 | 3.877  |
|                          | J00   | Acute nasopharyngitis (common cold)                                            | 3.184  |
| <b>Castile La Mancha</b> | M54.5 | Low back pain                                                                  | 9.639  |
|                          | K52.9 | Noninfective gastroenteritis and colitis, unspecified                          | 6.248  |
|                          | J00   | Acute nasopharyngitis (common cold)                                            | 4.891  |
|                          | J11   | Influenza, virus not indentified                                               | 4.162  |
|                          | K52   | Other noninfective gastroenteritis and colitis                                 | 3.929  |
|                          | J03.9 | Acute tonsillitis, unspecified                                                 | 3.363  |
|                          | M54.2 | Cervicalgia                                                                    | 3.049  |
|                          | M54.3 | Sciatica                                                                       | 2.947  |
| <b>Catalonia</b>         | K52.9 | Noninfective gastroenteritis and colitis, unspecified                          | 11.871 |
|                          | J00   | Acute nasopharyngitis (common cold)                                            | 82.707 |
|                          | M54.5 | Low back pain                                                                  | 77.901 |
|                          | J11   | Influenza, virus not indentified                                               | 62.867 |
|                          | F41.9 | Anxiety disorder, unspecified                                                  | 55.710 |
|                          | B97.8 | Other viral agents as the cause of diseases classified to other chapters       | 41.739 |
|                          | J03.9 | Acute tonsillitis, unspecified                                                 | 33.821 |
|                          | M54.2 | Cervicalgia                                                                    | 26.867 |
| <b>Extremadura</b>       | M54.5 | Low back pain                                                                  | 3.009  |
|                          | J11   | Influenza, virus not indentified                                               | 1.940  |
|                          | S93   | Dislocation, sprain and strain of joints and ligaments at ankle and foot level | 1.105  |
|                          | M54.2 | Cervicalgia                                                                    | 894    |
|                          | M54.3 | Sciatica                                                                       | 804    |
|                          | F41   | Other anxiety disorders                                                        | 723    |
|                          | M54.9 | Dorsalgia, unspecified                                                         | 688    |

|                                       |       |                                                                                |        |
|---------------------------------------|-------|--------------------------------------------------------------------------------|--------|
|                                       | M75   | Shoulder lesions                                                               | 560    |
| <b>Galicia</b>                        | M54.5 | Low back pain                                                                  | 13.555 |
|                                       | J11   | Influenza, virus not indentified                                               | 10.794 |
|                                       | M54.2 | Cervicalgia                                                                    | 5.343  |
|                                       | F41   | Other anxiety disorders                                                        | 5.053  |
|                                       | J20.9 | Acute bronchitis, unspecified                                                  | 4.800  |
|                                       | M54.3 | Sciatica                                                                       | 3.402  |
|                                       | J03.9 | Acute tonsillitis, unspecified                                                 | 3.169  |
|                                       | S93   | Dislocation, sprain and strain of joints and ligaments at ankle and foot level | 2.705  |
| <b>Community of Madrid</b>            | K52.9 | Noninfective gastroenteritis and colitis, unspecified                          | 56.245 |
|                                       | M54.5 | Low back pain                                                                  | 33.522 |
|                                       | F41   | Other anxiety disorders                                                        | 28.118 |
|                                       | J02.9 | Acute pharyngitis, unspecified                                                 | 25.029 |
|                                       | J11   | Influenza, virus not indentified                                               | 19.656 |
|                                       | M25   | Other joint disorders, not elsewhere classified                                | 17.815 |
|                                       | M54.3 | Sciatica                                                                       | 16.627 |
|                                       | J06.9 | Acute upper respiratory infection, unspecified                                 | 15.924 |
| <b>Region of Murcia</b>               | K52.9 | Noninfective gastroenteritis and colitis, unspecified                          | 7.114  |
|                                       | J11   | Influenza, virus not indentified                                               | 6.808  |
|                                       | M54.5 | Low back pain                                                                  | 6.657  |
|                                       | J02.9 | Acute pharyngitis, unspecified                                                 | 4.808  |
|                                       | M54.3 | Sciatica                                                                       | 4.037  |
|                                       | R45   | Symtoms and sings involving emotional state                                    | 3.637  |
|                                       | M54.2 | Cervicalgia                                                                    | 3.253  |
|                                       | J06.9 | Acute upper respiratory infection, unspecified                                 | 2.438  |
| <b>Chartered Community of Navarre</b> | K52.9 | Noninfective gastroenteritis and colitis, unspecified                          | 9.976  |
|                                       | J11   | Influenza, virus not indentified                                               | 8.159  |
|                                       | M54.5 | Low back pain                                                                  | 6.098  |
|                                       | J06.9 | Acute upper respiratory infection, unspecified                                 | 5.264  |
|                                       | J00   | Acute nasopharyngitis (common cold)                                            | 4.080  |
|                                       | A08.5 | Ofter specified intestinal infections                                          | 3.165  |
|                                       | J20.9 | Acute bronchitis, unspecified                                                  | 3.082  |
|                                       | F41.9 | Anxiety disorder, unspecified                                                  | 2.873  |
| <b>La Rioja</b>                       | K52.9 | Noninfective gastroenteritis and colitis, unspecified                          | 3.216  |
|                                       | J00   | Acute nasopharyngitis (common cold)                                            | 2.073  |
|                                       | J11   | Influenza, virus not indentified                                               | 1.661  |
|                                       | M54.5 | Low back pain                                                                  | 1.613  |
|                                       | M54.3 | Sciatica                                                                       | 823    |
|                                       | J06.9 | Acute upper respiratory infection,                                             | 576    |

|                       |       |                                                       |        |
|-----------------------|-------|-------------------------------------------------------|--------|
|                       |       | unspecified                                           |        |
|                       | M25.5 | Pain in joint                                         | 529    |
|                       | R45.0 | Nervousness                                           | 515    |
| <b>Valencia</b>       | M54.5 | Low back pain                                         | 22.410 |
|                       | J11   | Influenza, virus not indentified                      | 18.243 |
|                       | F41.9 | Anxiety disorder, unspecified                         | 12.054 |
|                       | K52.9 | Noninfective gastroenteritis and colitis, unspecified | 11.770 |
|                       | J00   | Acute nasopharyngitis (common cold)                   | 9.739  |
|                       | M54.2 | Cervicalgia                                           | 8.411  |
|                       | M54.3 | Sciatica                                              | 7.227  |
|                       | J20.9 | Acute bronchitis, unspecified                         | 6.953  |
| <b>Basque Country</b> | M54.5 | Low back pain                                         | 2.038  |
|                       | M54.2 | Cervicalgia                                           | 1.986  |
|                       | J00   | Acute nasopharyngitis (common cold)                   | 948    |
|                       | K52.9 | Noninfective gastroenteritis and colitis, unspecified | 759    |
|                       | J11   | Influenza, virus not indentified                      | 662    |
|                       | F43.2 | Ajustment disorders                                   | 638    |
|                       | F41.9 | Anxiety disorder, unspecified                         | 625    |
|                       | R10   | Abdominal and pelvic pain                             | 609    |



Table 5. Sickness absence situations by economic activity (International Standard Industrial Classification of all Economic Activities, ISIC Rev-4)

| Autonomous Community            | Code                                   | Economic Activities                                                                 | Sickness absence situations                                                         |       |
|---------------------------------|----------------------------------------|-------------------------------------------------------------------------------------|-------------------------------------------------------------------------------------|-------|
| <b>Andalusia</b>                | 8411                                   | General public administration activities                                            | 61.457                                                                              |       |
|                                 | 8610                                   | Hospital activities                                                                 | 40.544                                                                              |       |
|                                 | 8121                                   | General cleaning of buildings                                                       | 23.802                                                                              |       |
|                                 | 5610                                   | Restaurants and mobile food service activities                                      | 23.377                                                                              |       |
|                                 | 5630                                   | Beverage serving activities                                                         | 20.659                                                                              |       |
|                                 | 4100                                   | Construction of buildings                                                           | 16.608                                                                              |       |
|                                 | 4711                                   | Retail sale in non-specialized stores with food, beverages or tobacco predominating | 16.253                                                                              |       |
|                                 | 5510                                   | Hotels and similar accommodation                                                    | 16.061                                                                              |       |
|                                 | 4630                                   | Wholesale of food, beverage and tobacco                                             | 15.010                                                                              |       |
|                                 | 8220                                   | Activities of call centres                                                          | 14.652                                                                              |       |
|                                 | <b>Aragon</b>                          | 8411                                                                                | General public administration activities                                            | 9.685 |
|                                 |                                        | 8610                                                                                | Hospital activities                                                                 | 8.022 |
| 7820                            |                                        | Temporary employment agency activities                                              | 7.550                                                                               |       |
| 2930                            |                                        | Manufacture of parts and accessories of motor vehicles                              | 5.874                                                                               |       |
| 8121                            |                                        | General cleaning of buildings                                                       | 5.464                                                                               |       |
| 4711                            |                                        | Retail sale in non-specialized stores with food, beverages or tobacco predominating | 3.773                                                                               |       |
| 5610                            |                                        | Restaurants and mobile food service activities                                      | 3.669                                                                               |       |
| 8220                            |                                        | Activities of call centres                                                          | 3.459                                                                               |       |
| 4923                            |                                        | Freight transport by road                                                           | 3.214                                                                               |       |
| 5630                            |                                        | Beverage serving activities                                                         | 3.073                                                                               |       |
| <b>Principality of Asturias</b> |                                        | 8610                                                                                | Hospital activities                                                                 | 6.422 |
|                                 |                                        | 4711                                                                                | Retail sale in non-specialized stores with food, beverages or tobacco predominating | 5.217 |
|                                 | 8411                                   | General public administration activities                                            | 4.000                                                                               |       |
|                                 | 5630                                   | Beverage serving activities                                                         | 2.560                                                                               |       |
|                                 | 2410                                   | Manufacture of basic iron and steel                                                 | 2.330                                                                               |       |
|                                 | 8121                                   | General cleaning of buildings                                                       | 2.285                                                                               |       |
|                                 | 5610                                   | Restaurants and mobile food service activities                                      | 2.047                                                                               |       |
|                                 | 8730                                   | Residential care activities for the elderly and disabled                            | 1.950                                                                               |       |
| 8122                            | Other building and industrial cleaning | 1.651                                                                               |                                                                                     |       |

|                         |      |                                                                                     |        |
|-------------------------|------|-------------------------------------------------------------------------------------|--------|
|                         |      | activities                                                                          |        |
|                         | 9700 | Activities of households as employers of domestic personnel                         | 1.365  |
| <b>Balearic Islands</b> | 5510 | Hotels and similar accomodation                                                     | 19.736 |
|                         | 5610 | Restaurants and mobile food service activities                                      | 9.399  |
|                         | 8610 | Hospital activities                                                                 | 8.059  |
|                         | 8411 | General public administration activities                                            | 6.141  |
|                         | 4100 | Construction of buildings                                                           | 6.129  |
|                         | 4711 | Retail sale in non-specialized stores with food, beverages or tobacco predominating | 5.078  |
|                         | 5630 | Beverage serving activities                                                         | 4.740  |
|                         | 8121 | General cleaning of buildings                                                       | 4.125  |
|                         | 5520 | Short term accommodation activities                                                 | 3.034  |
|                         | 4751 | Retail sale of textiles in specialized stores                                       | 2.408  |
| <b>Canary Islands</b>   | 5510 | Hotels and similar accomodation                                                     | 26.147 |
|                         | 8610 | Hospital activities                                                                 | 16.865 |
|                         | 8411 | General public administration activities                                            | 15.899 |
|                         | 5610 | Restaurants and mobile food service activities                                      | 11.628 |
|                         | 4711 | Retail sale in non-specialized stores with food, beverages or tobacco predominating | 10.495 |
|                         | 5520 | Short term accommodation activities                                                 | 7.221  |
|                         | 8121 | General cleaning of buildings                                                       | 7.000  |
|                         | 5630 | Beverage serving activities                                                         | 5.507  |
|                         | 4100 | Construction of buildings                                                           | 5.414  |
|                         | 8521 | General secondary education                                                         | 5.340  |
| <b>Cantabria</b>        | 8411 | General public administration activities                                            | 3.851  |
|                         | 7820 | Temporary employment agency activities                                              | 3.612  |
|                         | 8610 | Hospital activities                                                                 | 3.492  |
|                         | 8121 | General cleaning of buildings                                                       | 1.828  |
|                         | 5610 | Restaurants and mobile food service activities                                      | 1.616  |
|                         | 5630 | Beverage serving activities                                                         | 1.383  |
|                         | 8220 | Activities of call centres                                                          | 1.170  |
|                         | 8521 | General secondary education                                                         | 1.170  |
|                         | 4791 | Retail sale via mail order houses or via Internet                                   | 1.023  |
|                         | 8620 | Medical and dental practice activities                                              | 998    |
| <b>Castile and Leon</b> | 8411 | General public administration activities                                            | 9.940  |
|                         | 8610 | Hospital activities                                                                 | 9.741  |
|                         | 8220 | Activities of call centres                                                          | 8.920  |

|                          |      |                                                                                     |        |
|--------------------------|------|-------------------------------------------------------------------------------------|--------|
|                          | 8121 | General cleaning of buildings                                                       | 7.489  |
|                          | 4711 | Retail sale in non-specialized stores with food, beverages or tobacco predominating | 5.953  |
|                          | 8790 | Other residential care activities                                                   | 5.089  |
|                          | 5630 | Beverage serving activities                                                         | 5.023  |
|                          | 7820 | Temporary employment agency activities                                              | 4.676  |
|                          | 5610 | Restaurants and mobile food service activities                                      | 4.493  |
|                          | 2910 | Manufacture of motor vehicles                                                       | 4.409  |
| <b>Castile La Mancha</b> | 8411 | General public administration activities                                            | 15.003 |
|                          | 8610 | Hospital activities                                                                 | 7.820  |
|                          | 8121 | General cleaning of buildings                                                       | 5.363  |
|                          | 7820 | Temporary employment agency activities                                              | 5.272  |
|                          | 5210 | Warehousing and storage                                                             | 5.251  |
|                          | 4100 | Construction of buildings                                                           | 4.479  |
|                          | 4711 | Retail sale in non-specialized stores with food, beverages or tobacco predominating | 4.267  |
|                          | 5610 | Restaurants and mobile food service activities                                      | 4.092  |
|                          | 4923 | Freight transport by road                                                           | 3.846  |
|                          | 5630 | Beverage serving activities                                                         | 3.526  |
| <b>Catalonia</b>         | 8610 | Hospital activities                                                                 | 75.958 |
|                          | 8411 | General public administration activities                                            | 70.569 |
|                          | 5610 | Restaurants and mobile food service activities                                      | 45.084 |
|                          | 8121 | General cleaning of buildings                                                       | 44.117 |
|                          | 7820 | Temporary employment agency activities                                              | 43.109 |
|                          | 8220 | Activities of call centres                                                          | 37.877 |
|                          | 4711 | Retail sale in non-specialized stores with food, beverages or tobacco predominating | 30.528 |
|                          | 4751 | Retail sale of textiles in specialized stores                                       | 24.417 |
|                          | 8812 | Social work activities without accommodation for the elderly and disabled           | 20.007 |
|                          | 8423 | Public order and safety activities                                                  | 19.807 |
| <b>Extremadura</b>       | 8411 | General public administration activities                                            | 10.813 |
|                          | 8610 | Hospital activities                                                                 | 5.921  |
|                          | 8121 | General cleaning of buildings                                                       | 2.007  |
|                          | 8812 | Social work activities without accommodation for the elderly and                    | 1.643  |

|                            |      |                                                                                     |        |
|----------------------------|------|-------------------------------------------------------------------------------------|--------|
|                            |      | disabled                                                                            |        |
|                            | 4100 | Construction of buildings                                                           | 1.610  |
|                            | 5630 | Beverage serving activities                                                         | 1.599  |
|                            | 4711 | General public administration activities                                            | 1.136  |
|                            | 5610 | Restaurants and mobile food service activities                                      | 1.044  |
|                            | 4923 | Freight transport by road                                                           | 914    |
|                            | 0150 | Mixed farming                                                                       | 902    |
| <b>Galicia</b>             | 8610 | Hospital activities                                                                 | 12.552 |
|                            | 8411 | General public administration activities                                            | 12.137 |
|                            | 4711 | Retail sale in non-specialized stores with food, beverages or tobacco predominating | 7.498  |
|                            | 5630 | Beverage serving activities                                                         | 6.532  |
|                            | 8121 | General cleaning of buildings                                                       | 5.775  |
|                            | 7820 | Temporary employment agency activities                                              | 5.270  |
|                            | 9700 | Activities of households as employers of domestic personnel                         | 4.830  |
|                            | 5610 | Restaurants and mobile food service activities                                      | 4.664  |
|                            | 8220 | Activities of call centres                                                          | 4.558  |
|                            | 4100 | Construction of buildings                                                           | 3.622  |
| <b>Community of Madrid</b> | 8610 | Hospital activities                                                                 | 44.482 |
|                            | 8121 | General cleaning of buildings                                                       | 42.703 |
|                            | 5610 | Restaurants and mobile food service activities                                      | 36.939 |
|                            | 4711 | General public administration activities                                            | 35.475 |
|                            | 8220 | Activities of call centres                                                          | 29.212 |
|                            | 4711 | Retail sale in non-specialized stores with food, beverages or tobacco predominating | 28.014 |
|                            | 9700 | Activities of households as employers of domestic personnel                         | 21.385 |
|                            | 8299 | Other business support service activities n.e.c                                     | 20.351 |
|                            | 5630 | Beverage serving activities                                                         | 17.608 |
|                            | 4751 | Retail sale of textiles in specialized stores                                       | 15.735 |
| <b>Region of Murcia</b>    | 8620 | Medical and dental practice activities                                              | 11.008 |
|                            | 0113 | Growing of vegetables and melons, roots and tubers                                  | 7.233  |
|                            | 7820 | Temporary employment agency activities                                              | 6.037  |
|                            | 4711 | General public administration activities                                            | 6.003  |
|                            | 8121 | General cleaning of buildings                                                       | 4.915  |

|    |                                       |                                                                                     |        |
|----|---------------------------------------|-------------------------------------------------------------------------------------|--------|
| 1  |                                       |                                                                                     |        |
| 2  |                                       |                                                                                     |        |
| 3  |                                       |                                                                                     |        |
| 4  |                                       |                                                                                     |        |
| 5  |                                       |                                                                                     |        |
| 6  |                                       |                                                                                     |        |
| 7  |                                       |                                                                                     |        |
| 8  |                                       |                                                                                     |        |
| 9  |                                       |                                                                                     |        |
| 10 |                                       |                                                                                     |        |
| 11 |                                       |                                                                                     |        |
| 12 |                                       |                                                                                     |        |
| 13 |                                       |                                                                                     |        |
| 14 | <b>Chartered Community of Navarre</b> |                                                                                     |        |
| 15 |                                       |                                                                                     |        |
| 16 |                                       |                                                                                     |        |
| 17 |                                       |                                                                                     |        |
| 18 |                                       |                                                                                     |        |
| 19 |                                       |                                                                                     |        |
| 20 |                                       |                                                                                     |        |
| 21 |                                       |                                                                                     |        |
| 22 |                                       |                                                                                     |        |
| 23 |                                       |                                                                                     |        |
| 24 |                                       |                                                                                     |        |
| 25 |                                       |                                                                                     |        |
| 26 |                                       |                                                                                     |        |
| 27 |                                       |                                                                                     |        |
| 28 |                                       |                                                                                     |        |
| 29 |                                       |                                                                                     |        |
| 30 |                                       |                                                                                     |        |
| 31 |                                       |                                                                                     |        |
| 32 |                                       |                                                                                     |        |
| 33 |                                       |                                                                                     |        |
| 34 | <b>La Rioja</b>                       |                                                                                     |        |
| 35 |                                       |                                                                                     |        |
| 36 |                                       |                                                                                     |        |
| 37 |                                       |                                                                                     |        |
| 38 |                                       |                                                                                     |        |
| 39 |                                       |                                                                                     |        |
| 40 |                                       |                                                                                     |        |
| 41 |                                       |                                                                                     |        |
| 42 |                                       |                                                                                     |        |
| 43 |                                       |                                                                                     |        |
| 44 |                                       |                                                                                     |        |
| 45 |                                       |                                                                                     |        |
| 46 |                                       |                                                                                     |        |
| 47 |                                       |                                                                                     |        |
| 48 |                                       |                                                                                     |        |
| 49 |                                       |                                                                                     |        |
| 50 |                                       |                                                                                     |        |
| 51 | <b>Valencia</b>                       |                                                                                     |        |
| 52 |                                       |                                                                                     |        |
| 53 |                                       |                                                                                     |        |
| 54 |                                       |                                                                                     |        |
| 55 |                                       |                                                                                     |        |
| 56 |                                       |                                                                                     |        |
| 57 |                                       |                                                                                     |        |
| 58 |                                       |                                                                                     |        |
| 59 |                                       |                                                                                     |        |
| 60 |                                       |                                                                                     |        |
|    | 5610                                  | Restaurants and mobile food service activities                                      | 3.672  |
|    | 5630                                  | Beverage serving activities                                                         | 3.635  |
|    | 4630                                  | Wholesale of food, beverage and tobacco                                             | 3.514  |
|    | 4711                                  | Retail sale in non-specialized stores with food, beverages or tobacco predominating | 3.228  |
|    | 4923                                  | Freight transport by road                                                           | 2,914  |
|    | 8610                                  | Hospital activities                                                                 | 14.408 |
|    | 8411                                  | General public administration activities                                            | 7.408  |
|    | 2930                                  | Manufacture of parts and accesories of motor vehicles                               | 5.782  |
|    | 7820                                  | Temporary employment agency activities                                              | 5.558  |
|    | 8521                                  | General secondary education                                                         | 3.909  |
|    | 8121                                  | General cleaning of buildings                                                       | 3.520  |
|    | 1030                                  | Processing and preserving of fruit and vegetables                                   | 3.256  |
|    | 2910                                  | Manufacture of motor vehicles                                                       | 3.195  |
|    | 8812                                  | Social work activities without acommodation for the edery and disabled              | 3.151  |
|    | 9700                                  | Activities of households as employers of domestic personnel                         | 2.382  |
|    | 8610                                  | Hospital activities                                                                 | 1.698  |
|    | 8611                                  | General public administration activities                                            | 1.612  |
|    | 1520                                  | Manufacture of footwear                                                             | 1.463  |
|    | 8121                                  | General cleaning of buildings                                                       | 1.290  |
|    | 1030                                  | Processing and preserving of fruit and vegetables                                   | 1.217  |
|    | 7820                                  | Temporary employment agency activities                                              | 1.060  |
|    | 2930                                  | Manufacture of parts and accesories of motor vehicles                               | 1.006  |
|    | 5630                                  | Beverage serving activities                                                         | 973    |
|    | 1102                                  | Manufacture of wines                                                                | 962    |
|    | 0113                                  | Growing of vegetables and melons, roots and tubers                                  | 907    |
|    | 8610                                  | Hospital activities                                                                 | 24.063 |
|    | 8611                                  | General public administration activities                                            | 23.311 |
|    | 5610                                  | Restaurants and mobile food service activities                                      | 16.234 |
|    | 8121                                  | General cleaning of buildings                                                       | 12.758 |
|    | 4711                                  | Retail sale in non-specialized stores with food, beverages or tobacco               | 11.239 |

|                       |      |                                                                                     |        |
|-----------------------|------|-------------------------------------------------------------------------------------|--------|
|                       |      | predominating                                                                       |        |
|                       | 4630 | Wholesale of food, beverage and tobacco                                             | 7.300  |
|                       | 5630 | Beverage serving activities                                                         | 8.732  |
|                       | 4923 | Freight transport by road                                                           | 7.300  |
|                       | 7820 | Temporary employment agency activities                                              | 7.126  |
|                       | 4100 | Construction of buildings                                                           | 6.663  |
| <b>Basque Country</b> | 8610 | Hospital activities                                                                 | 22.704 |
|                       | 8611 | General public administration activities                                            | 15.565 |
|                       | 8121 | General cleaning of buildings                                                       | 13.043 |
|                       | 8521 | General secondary education                                                         | 12.519 |
|                       | 8812 | Social work activities without accommodation for the elderly and disabled           | 8.760  |
|                       | 5610 | Restaurants and mobile food service activities                                      | 8.419  |
|                       | 4711 | Retail sale in non-specialized stores with food, beverages or tobacco predominating | 6.625  |
|                       | 9700 | Activities of households as employers of domestic personnel                         | 6.284  |
|                       | 2591 | Forging, pressing, stamping and roll-forming of metal; powder metallurgy            | 6.086  |
|                       | 5630 | Beverage serving activities                                                         | 5.842  |

1 STROBE Statement—Checklist of items that should be included in reports of *cohort studies*2  
3  
4  
5  
6  
7  
8  
9  
10  
11  
12  
13  
14  
15  
16  
17  
18  
19  
20  
21  
22  
23  
24  
25  
26  
27  
28  
29  
30  
31  
32  
33  
34  
35  
36  
37  
38  
39  
40  
41  
42  
43  
44  
45  
46  
47  
48  
49  
50  
51  
52  
53  
54  
55  
56  
57  
58  
59  
60

|                              | Item No | Recommendation                                                                                                                                                                                                                                                                                                         | Page No               |
|------------------------------|---------|------------------------------------------------------------------------------------------------------------------------------------------------------------------------------------------------------------------------------------------------------------------------------------------------------------------------|-----------------------|
| <b>Title and abstract</b>    | 1       | (a) Indicate the study's design with a commonly used term in the title or the abstract<br>(b) Provide in the abstract an informative and balanced summary of what was done and what was found                                                                                                                          | 1<br>1                |
| <b>Introduction</b>          |         |                                                                                                                                                                                                                                                                                                                        |                       |
| Background/rationale         | 2       | Explain the scientific background and rationale for the investigation being reported                                                                                                                                                                                                                                   | 3                     |
| Objectives                   | 3       | State specific objectives, including any prespecified hypotheses                                                                                                                                                                                                                                                       | 3                     |
| <b>Methods</b>               |         |                                                                                                                                                                                                                                                                                                                        |                       |
| Study design                 | 4       | Present key elements of study design early in the paper                                                                                                                                                                                                                                                                | 4                     |
| Setting                      | 5       | Describe the setting, locations, and relevant dates, including periods of recruitment, exposure, follow-up, and data collection                                                                                                                                                                                        | 4                     |
| Participants                 | 6       | (a) Give the eligibility criteria, and the sources and methods of selection of participants. Describe methods of follow-up<br>(b) For matched studies, give matching criteria and number of exposed and unexposed                                                                                                      | 4                     |
| Variables                    | 7       | Clearly define all outcomes, exposures, predictors, potential confounders, and effect modifiers. Give diagnostic criteria, if applicable                                                                                                                                                                               | 4                     |
| Data sources/<br>measurement | 8*      | For each variable of interest, give sources of data and details of methods of assessment (measurement). Describe comparability of assessment methods if there is more than one group                                                                                                                                   | 4                     |
| Bias                         | 9       | Describe any efforts to address potential sources of bias                                                                                                                                                                                                                                                              | 4                     |
| Study size                   | 10      | Explain how the study size was arrived at                                                                                                                                                                                                                                                                              | 4                     |
| Quantitative variables       | 11      | Explain how quantitative variables were handled in the analyses. If applicable, describe which groupings were chosen and why                                                                                                                                                                                           | 4                     |
| Statistical methods          | 12      | (a) Describe all statistical methods, including those used to control for confounding<br>(b) Describe any methods used to examine subgroups and interactions<br>(c) Explain how missing data were addressed<br>(d) If applicable, explain how loss to follow-up was addressed<br>(e) Describe any sensitivity analyses | 4<br>4<br>4<br>4<br>4 |
| <b>Results</b>               |         |                                                                                                                                                                                                                                                                                                                        |                       |
| Participants                 | 13*     | (a) Report numbers of individuals at each stage of study—eg numbers potentially eligible, examined for eligibility, confirmed eligible, included in the study, completing follow-up, and analysed<br>(b) Give reasons for non-participation at each stage<br>(c) Consider use of a flow diagram                        | 5                     |
| Descriptive data             | 14*     | (a) Give characteristics of study participants (eg demographic, clinical, social) and information on exposures and potential confounders<br>(b) Indicate number of participants with missing data for each variable of interest<br>(c) Summarise follow-up time (eg, average and total amount)                         | 5<br>5                |
| Outcome data                 | 15*     | Report numbers of outcome events or summary measures over time                                                                                                                                                                                                                                                         | 5                     |

|    |                          |    |                                                                                                                                                                                                              |     |
|----|--------------------------|----|--------------------------------------------------------------------------------------------------------------------------------------------------------------------------------------------------------------|-----|
| 1  | Main results             | 16 | (a) Give unadjusted estimates and, if applicable, confounder-adjusted estimates and their precision (eg, 95% confidence interval). Make clear which confounders were adjusted for and why they were included | 5-6 |
| 2  |                          |    | (b) Report category boundaries when continuous variables were categorized                                                                                                                                    |     |
| 3  |                          |    | (c) If relevant, consider translating estimates of relative risk into absolute risk for a meaningful time period                                                                                             |     |
| 4  | Other analyses           | 17 | Report other analyses done—eg analyses of subgroups and interactions, and sensitivity analyses                                                                                                               | 5-6 |
| 5  | <b>Discussion</b>        |    |                                                                                                                                                                                                              |     |
| 6  | Key results              | 18 | Summarise key results with reference to study objectives                                                                                                                                                     | 7-8 |
| 7  | Limitations              | 19 | Discuss limitations of the study, taking into account sources of potential bias or imprecision. Discuss both direction and magnitude of any potential bias                                                   | 8   |
| 8  | Interpretation           | 20 | Give a cautious overall interpretation of results considering objectives, limitations, multiplicity of analyses, results from similar studies, and other relevant evidence                                   | 8   |
| 9  | Generalisability         | 21 | Discuss the generalisability (external validity) of the study results                                                                                                                                        | 8   |
| 10 | <b>Other information</b> |    |                                                                                                                                                                                                              |     |
| 11 | Funding                  | 22 | Give the source of funding and the role of the funders for the present study and, if applicable, for the original study on which the present article is based                                                | 8   |

\*Give information separately for exposed and unexposed groups.

**Note:** An Explanation and Elaboration article discusses each checklist item and gives methodological background and published examples of transparent reporting. The STROBE checklist is best used in conjunction with this article (freely available on the Web sites of PLoS Medicine at <http://www.plosmedicine.org/>, Annals of Internal Medicine at <http://www.annals.org/>, and Epidemiology at <http://www.epidem.com/>). Information on the STROBE Initiative is available at <http://www.strobe-statement.org>.



# BMJ Open

## DESCRIPTIVE STUDY OF SICKNESS ABSENCE IN SPAIN IN 2018

|                                 |                                                                                                                                                                                                                                                                                                                                                                                                                                                                                                             |
|---------------------------------|-------------------------------------------------------------------------------------------------------------------------------------------------------------------------------------------------------------------------------------------------------------------------------------------------------------------------------------------------------------------------------------------------------------------------------------------------------------------------------------------------------------|
| Journal:                        | <i>BMJ Open</i>                                                                                                                                                                                                                                                                                                                                                                                                                                                                                             |
| Manuscript ID                   | bmjopen-2020-038239.R1                                                                                                                                                                                                                                                                                                                                                                                                                                                                                      |
| Article Type:                   | Original research                                                                                                                                                                                                                                                                                                                                                                                                                                                                                           |
| Date Submitted by the Author:   | 20-May-2020                                                                                                                                                                                                                                                                                                                                                                                                                                                                                                 |
| Complete List of Authors:       | Alba- Jurado, Matilde-Leonor; National Institute of Social Security, Medical Unit<br>Aguado, María-José; Chief Medical Inspector. , Director of Coordination of Medical Units. National Institute of Social Security.<br>Moreno-Morales, Noelia; University of Malaga Faculty of Health Sciences, Physiotherapy<br>Labajos-Manzanares, Maria Teresa; University of Malaga Faculty of Health Sciences, Physiotherapy<br>Martín-Valero, Rocío; University of Malaga Faculty of Health Sciences, Physiotherapy |
| <b>Primary Subject Heading</b>: | Occupational and environmental medicine                                                                                                                                                                                                                                                                                                                                                                                                                                                                     |
| Secondary Subject Heading:      | Public health                                                                                                                                                                                                                                                                                                                                                                                                                                                                                               |
| Keywords:                       | PREVENTIVE MEDICINE, PUBLIC HEALTH, OCCUPATIONAL & INDUSTRIAL MEDICINE                                                                                                                                                                                                                                                                                                                                                                                                                                      |
|                                 |                                                                                                                                                                                                                                                                                                                                                                                                                                                                                                             |

SCHOLARONE™  
Manuscripts



I, the Submitting Author has the right to grant and does grant on behalf of all authors of the Work (as defined in the below author licence), an exclusive licence and/or a non-exclusive licence for contributions from authors who are: i) UK Crown employees; ii) where BMJ has agreed a CC-BY licence shall apply, and/or iii) in accordance with the terms applicable for US Federal Government officers or employees acting as part of their official duties; on a worldwide, perpetual, irrevocable, royalty-free basis to BMJ Publishing Group Ltd ("BMJ") its licensees and where the relevant Journal is co-owned by BMJ to the co-owners of the Journal, to publish the Work in this journal and any other BMJ products and to exploit all rights, as set out in our [licence](#).

The Submitting Author accepts and understands that any supply made under these terms is made by BMJ to the Submitting Author unless you are acting as an employee on behalf of your employer or a postgraduate student of an affiliated institution which is paying any applicable article publishing charge ("APC") for Open Access articles. Where the Submitting Author wishes to make the Work available on an Open Access basis (and intends to pay the relevant APC), the terms of reuse of such Open Access shall be governed by a Creative Commons licence – details of these licences and which [Creative Commons](#) licence will apply to this Work are set out in our licence referred to above.

Other than as permitted in any relevant BMJ Author's Self Archiving Policies, I confirm this Work has not been accepted for publication elsewhere, is not being considered for publication elsewhere and does not duplicate material already published. I confirm all authors consent to publication of this Work and authorise the granting of this licence.

1  
2  
3 **TITLE PAGE**

4  
5 **TITLE:** DESCRIPTIVE STUDY OF SICKNESS ABSENCE IN SPAIN IN 2018

6  
7 **AUTHORS:** Matilde-Leonor Alba-Jurado<sup>1</sup>, María-José Aguado-Benedí<sup>2</sup>, Noelia  
8  
9 Moreno-Morales<sup>3</sup>, María-Teresa Labajos-Manzanares<sup>3</sup>, Rocío Martín-Valero<sup>3\*</sup>

10  
11  
12 \*CORRESPONDENCE AUTHOR: [rovalemas@gmail.com](mailto:rovalemas@gmail.com)

13  
14 <sup>1</sup>Medical Inspector. Medical Unit. National Institute of Social Security. Kandinsky 12  
15  
16 Bajo, 2010 Málaga, Spain. Email: [matilde-leonor.alba@seg-social.es](mailto:matilde-leonor.alba@seg-social.es)

17  
18  
19 <sup>2</sup>Chief Medical Inspector. General Deputy Director of Coordination of Medical Units.  
20  
21 National Institute of Social Security. Padre Damian 4-6, 6º, 28036, Madrid, Spain.

22  
23  
24 Associate professor of Department of Legal Medicine, Pathology and Psychiatry.  
25  
26 Complutense University of Madrid. Spain.

27  
28  
29 <sup>3</sup>University Professor of Department of Physiotherapy, Faculty of Health Sciences,  
30  
31 University of Malaga, Arquitecto Francisco Peñalosa 3, Ampliación de Campus de  
32  
33 Teatinos, 29071 Malaga, Spain

34  
35  
36  
37 WORD COUNT: 3572 words

38  
39  
40 40 References

41  
42  
43 5 Tables

44  
45  
46 **KEYWORDS:** PREVENTIVE MEDICINE, PUBLIC HEALTH, OCCUPATIONAL &  
47  
48 INDUSTRIAL MEDICINE, SICKNESS ABSENCE, HEALTH CARE WORKERS

49  
50  
51 **Orcid ids:** Matilde-Leonor Alba-Jurado <https://orcid.org/0000-0002-3640-1047>

52  
53 Noelia Moreno Morales <https://orcid.org/0000-0001-5907-9735>

54  
55 María Teresa Labajos Manzanares <https://orcid.org/0000-0002-3911-4406>

56  
57 Rocío Martín Valero <http://orcid.org/0000-0002-1664-3647>

58  
59  
60 María José Aguado Benedí <https://orcid.org/0000-0002-3049-166X>

# TITLE: DESCRIPTIVE STUDY OF SICKNESS ABSENCE IN SPAIN IN 2018

## ABSTRACT

**Objectives:** To provide a wide and thorough description of SA in Spain, focusing on the different regions of the country and the main characteristics, thus generating a global view of this benefit.

**Methods:** A study of the SA spells managed by the medical units of the Spanish Institute of Social Security in 2018. The geographical scope of this observational study is the Autonomous Community. Incidence, prevalence, and average duration in employees and self-employed are described. In age and sex variables, we describe the incidence and the average duration. We have analysed the average duration by Diagnostic Chapters (ICD-10) and the highest number of SA spells by occupational activity and diagnosis.

**Results:** We analysed a total of 540,045 SA spells by non-work-related SA and 63,441 by work-related SA. The national average prevalence in non-work-related SA spells is 32.98/1000 for employees and 30.48/1000 for self-employed workers; in work-related SA spells it is 3.99/1000. The national incidence in non-work-related SA spells is 24.8/1000 for employees and 9.51/1000 for self-employed workers; in work-related SA spells it is 3.55/1000. The average duration is 58.67 days, with the longest duration being neoplasms and the shortest corresponds to infectious disease. "Influenza" is the diagnosis that generate the largest number of SA spells. "Activities of call centres" and "Temporary employment agency activities" with the highest number of SA spells. The Chartered Community of Navarra shows the greatest differences with the rest. The Community of Madrid shows the lowest prevalence, incidence, and average duration in work-related SA.

**Conclusions:** SA is one of the benefits of the Social Security system whose economic cost was 11,554,711.16 euros in 2019, 8.89% of the general Social Security budget for that year. For a better SA management, it is necessary to know the epidemiological differences that are in the different Autonomous Communities of Spain.

## STRENGTHS AND LIMITATIONS OF THIS STUDY

- The greatest strength of this study is the broad representativeness and thoroughness of its data.
- The data used are at a national level, which allows a great perspective of SA in Spain.
- It has not always been possible to compare the data between employed and self-employed workers.
- It has not always been possible to distinguish between non-work-related SA and work-related SA
- It did not allow concluding causality or relationships between the different variables

For peer review only

## 1 INTRODUCTION

2 Sickness absence (SA) is one of the benefits of Social Security, included in article 169  
3 of the Consolidated Text of the General Law of Social Security, RDL 8/2015 of October  
4 30<sup>th</sup>. It is defined as “*a situation due to common disease (non-work-related) or  
5 professional illness, accident, whether occupational or not, in which the worker  
6 requires and receives medical assistance and is unable to work*”. It comprises benefits  
7 in kind (medical assistance) and monetary compensations (benefits for SA). In Spain,  
8 we distinguish between non-work-related sickness absence (common disease and non-  
9 occupational accident) and work-related sickness absence (professional illness and  
10 occupational accident). The differences between one group and the other can be seen  
11 both in the economic amount of the benefits due to sick leave and in the social security  
12 contributions. To be entitled to this subsidy, there must be the medical examination and  
13 the sick leave is certified by the family practitioner from the State Health Services, in  
14 case of the common disease and non-occupational accident. If it is caused by  
15 occupational accidents or professional illness, this sick leave is certified by the  
16 physicians ascribed to the Insurance Companies linked to the Social Security system.  
17 The maximum duration of sick leave is 365 days, which can be extended for another  
18 180 days if the recovery and return of the worker to the workplace are expected at that  
19 time. If the duration of sickness benefits has expired and the person's state of health has  
20 not improved enough to return to work, the worker may receive a disability pension.  
21 The maximum duration of SA benefits is similar to other countries nearby such as  
22 Germany, Belgium, or Austria. However, there are considerable differences in all EU  
23 countries in terms of the amount of the payment and the requirements for receiving  
24 these benefits<sup>1</sup>.

25 In Spain, our system of social security is contributory. To this end, both the worker and  
26 the company contribute to the system every month a sum of money (contribution) so  
27 that the worker can obtain benefits in case of illness or accident. If the worker is self-  
28 employed, it is himself who makes these economic contributions exclusively for non-  
29 work-related SA. This self-employed person also can pay voluntarily an extra amount  
30 for work-related SA to obtain benefits if he or she has a professional illness or an  
31 occupational accident.

32 Concerning the rest of the countries of the Organisation for Economic Co-operation and  
33 Development (OECD), Spain is in an intermediate position regarding the SA days per  
34 worker/year. Mexico is in the highest position with 27.7 days, whereas Chile, in the  
35 lowest position, has 7.3 days. Spain has an average of 10.3 days, which is similar to the  
36 level of Austria and the Netherlands (10 days)  
37 (<https://stats.oecd.org/index.aspx?queryid=30123>)

38 Like most European countries, Spain's public sickness insurance scheme is a major  
39 component of its social security system<sup>1</sup>. The total financial cost of SA in the  
40 consolidated Social Security budgets for 2019 in Spain reached 11,554,711.16 euros,  
41 which is 8.89% of the general Social Security budget<sup>2</sup>. Besides, the importance of SA  
42 caused by disease or accident is not only determined by the social and financial costs  
43 that each State dedicates to it<sup>3</sup>, but also by the resources that employers assign to it<sup>4</sup>, as  
44 well as the productivity losses<sup>5</sup> and the deterioration of these workers' health<sup>6</sup>. It has

1  
2  
3 1 been reported that work absenteeism due to illness is, in itself, a risk factor to fall sick,  
4 2 new periods of SA, unemployment, permanent disability pension<sup>6-8</sup>, social exclusion<sup>9</sup>  
5 3 and death<sup>10, 11-13</sup>. Long SA periods generate both an early retirement from the job  
6 4 market, a slower salary increase, and an impoverishment of household wealth<sup>6,7-9</sup>.

8  
9 5 Spain is composed of 17 Autonomous Communities (regions). The 2018 Labour Force  
10 6 Survey shows significant differences between workers (employed and unemployed), the  
11 7 main occupational activities, gross domestic product (GDP), per capita income, and  
12 8 demographic characteristics. There are also differences in health resources and health  
13 9 expenditure by región. However, there are no significant differences in the prevalence  
14 10 and incidence of diseases (<https://www.msrebs.gob.es/>).

17 11 Considering these differences between the different regions, we want to see if there are  
18 12 also differences in SA spells, in order to be able to make better management and control  
19 13 of this public service.

21 14 Despite its relevance to public policies, there are few studies at the national level that  
22 15 describe the current situation of such benefits in our country; to date, the studies found  
23 16 in the literature related to this topic describe it partially<sup>14</sup>, in some provinces or specific  
24 17 areas<sup>15</sup>, about some specific diseases<sup>16</sup> or specific groups of workers<sup>17</sup>. The data we use  
25 18 are national, representing the whole of the workers in Spain. It is a comprehensive and  
26 19 representative study of the total of SA spells in our country, in 2018.

29 20 The general objective of this study is to provide a wide and thorough description of SA  
30 21 in Spain, focusing on the different regions of the country and stressing on the main  
31 22 characteristics and differences, thus generating a global view of this benefit.

33 23 The specific objectives would be the description of the incidence, prevalence, and  
34 24 average duration of SA. We also want to describe the average duration and incidence  
35 25 rate about age and sex, as well as the average duration of SA by Diagnostic Chapters  
36 26 following the ICD-10. We want to know the main occupational activities in which  
37 27 there are more workers with SA spells and the main diseases that cause more SA spells.

## 42 29 MATERIAL AND METHODS

44 30 This study was carried out using the statistical databases provided by the Spanish Institute of  
45 31 Social Security (INSS), which are published on the website of this organisation ([www.seg-social.es/wps/portal/wss/internet/EstadisticasPresupuestosEstudios/](http://www.seg-social.es/wps/portal/wss/internet/EstadisticasPresupuestosEstudios/)), and databases obtained  
46 32 from specific programs used by the Medical Units.

49 34 The reference population was formed by all the workers in Spain covered by the Social Security  
50 35 system in the year 2018. The study excluded the SA cases of civil workers, Armed Forces  
51 36 personnel, and workers of the General Judicial Benefit Society, whose control and management  
52 37 were not an object of study. SA spells with a duration of fewer than 4 days are not included,  
53 38 because they do not obtain economic benefits from the Social Security system in Spain.

56 39 In general, unemployed do not receive financial benefit for SA, but if a worker starts a SA spell  
57 40 while employed and then becomes unemployed, it is not possible to differentiate this in our  
58 41 database. The worker keeps receiving SA benefits, although the amount is lower.

1  
2  
3 1 Sample: we have used the 2018 total SA records of the Spanish National Institute of Social  
4 2 Security (INSS), which coincide with the total population studied.

5  
6 3 The variables used were: age (in ranges), sex, average SA duration, diagnosis and diagnostic  
7 4 group (International Classification of Diseases, ICD-10), employee or self-employed, non-  
8 5 work-related SA (common disease non-occupational accident) or work-related SA (occupational  
9 6 accident and professional illness), and occupations with higher SA ranking according to the  
10 7 International Standard Industrial Classification of all Economic Activities (ISIC Rev-4).

11  
12 8 The geographical scope of the study was the Autonomous Community.

13  
14 9 It is an observational study. The statistical calculations used to refer to all the people affiliated  
15 10 with the system, who were entitled to receive the SA benefit (AFI), calculated according to the  
16 11 data provided by the Public Employment Service, the General Treasury of Social Security,  
17 12 INSS and the Social Institute of the Navy.

18  
19 13 Incidence: the ratio that calculates the number of SA (MP2R) per 1000 affiliates. To compute  
20 14 the SA, we used the number of real registrations for the benefit (MP2R). Monthly datum:  
21 15  $MP2R * 1000 / AFI$ . Accumulated datum:  $average (MP2R) * 1000 / AFI$

22  
23 16 Prevalence: the ratio that calculates the number of SA processes in force per 1000 affiliates. To  
24 17 compute the processes in force, we used the number of perceivers at the end of the period  
25 18 (MP4). Monthly datum:  $MP4 * 1000 / AFI$ . Accumulated datum:  $average (MP4) * 1000 / AFI$

26  
27 19 The mean general duration is the average of all durations per year. The mean duration per age  
28 20 range and sex were calculated by dividing the number of days in SA by the number of workers  
29 21 in SA in that range. We also described the number of workers in SA per 1000 affiliates. We  
30 22 calculated the median for the average duration per diagnostic chapter, using the statistics  
31 23 software Excel®.

## 32 33 34 24 **Patient and public involvement**

35  
36 25 Anonymised patient data were used in this study. Patients and members of the public were not  
37 26 involved in the conducting of the study.

38  
39 27

## 40 41 28 **RESULTS**

42  
43 29 We analysed a total of 540,045 non-work-related SA spells and 63,441 work-related SA spells,  
44 30 which were those controlled by the Medical Units of the Spanish National Institute of Social  
45 31 Security. There is a total of 16,373,239 workers affiliated to social security.

46  
47 32 The age of the study participants is 16 to 70 years old, both men and women. All are included in  
48 33 all the variables studies (non-work-related, work-related, employed, self-employed, sex, age,  
49 34 diagnosis and occupational activities). Follow-up time is one year (2018).

50  
51 35 Our database doesn't distinguish between employed and self-employed workers in the case of  
52 36 work-related SA because not all self-employed workers pay this extra amount of money as  
53 37 explained in the introduction. However, in non-work-related SA such division is made (Table 1)

### 54 55 38 ***SA Prevalence***

56  
57 39 In the case of non-work-related SA, the prevalence is 32,68/1000, in you are an employed  
58 40 person and 30,48/1000 if you are self-employed. In work-related, the national prevalence is  
59 41 3,99/1000. In the non-work-related, it ranges between 27,3 in La Rioja and 40,45 in the Canary  
60 42 Islands in employed persons. In self-employed, it ranges between 21,5 in the Balearic Islands



and 40,63 in the Region of Murcia. In work-related SA, it ranges from 2.73 in the Community of Madrid to 5.51 in Galicia (Table 1).

### ***SA incidence***

In the case of non-work-related SA the national incidence is 24.87/1000 in you are an employed person and 9.51 in self-employed. In work-related SA, it is 3.55. Its values range between 12.76 in Extremadura and 36.7 in Catalonia (non-work-related, employed person); for self-employed it ranges between 7.71 in Community of Madrid and 16.46 in Chartered Community of Navarre (non-work-related SA). In work-related SA, it ranges from 2.89 in Madrid to 5.15 in the Balearic Islands (Table 1).

### ***Average SA duration***

The average duration is 58.67 days (in non-work-related SA from 38.81 days in employed to 91.38 days in self-employed) with a median of 48.53 days. In non-work-related SA for employees, it ranges between 24.64 days in Chartered Community of Navarre to 67.53 in Extremadura. For self-employed, it varies between 55.15 days in Navarra to 112.86 days in Extremadura. In work-related SA, it ranges from 30.94 days in the Balearic Islands to 50.14 in Cantabria (Table 1).

### ***SA spells and average duration (age ranges and sex).***

In table 2 the total number of workers on sick leave by age and sex was analyzed. We distinguish between the absolute number of workers on SA and the number of workers on SA per 1000 affiliated per age group and gender because in Spain, in almost all age groups there are more men than women affiliated to social security. This may result in more absolute numbers of sickness absence for men, although the number of SA is higher for women according to the number of affiliates.

Therefore, the total number of workers in SA by age and sex is higher in men than in women (Table 2). According to age range and sex, the number of affiliates in SA is higher in women, except in Castilla-León, Chartered Community of Navarre and the Basque Country between 16 and 25 years of age, Principality of Asturias and La Rioja between 26 and 35 years and La Rioja in 36-45 and 46-55 years.

The average duration is also higher in women than in men in all the age ranges, except in the Community of Madrid and La Rioja for 16-25 years, and Principality of Asturias, Balearic Islands, Canary Islands, Catalonia and Chartered Community of Navarre in workers over 65 years of age.

In women, the average duration is 58.5 days (minimum 12, maximum 137), with a median of 52 days. In men, the average is 53.08 days (minimum 13, maximum 118), with a median of 44.

### ***Average SA duration (diagnostic chapter)***

The average SA duration, in general, is 56.82 days, with a median of 52.80 days. In all the Autonomous Communities, the longest duration corresponds to neoplasms, followed by heart diseases and mental disorders. The shortest duration corresponds to infectious diseases (Table 3).

1  
2  
3 1 ***SA spells by International Classification Diseases 10 (ICD-10) diagnosis***  
4

5 2 Table 4 describes the main diagnoses that generate the largest numbers of SA spells (ranking of  
6 3 the leading 8 diagnoses). The most frequent diagnoses are: "*Influenza, virus not identified*",  
7 4 "*Lower back pain*" and "*Noninfective gastroenteritis and colitis, unspecified*".  
8

9 5 ***SA spells by International Standard Industrial Classification of all Economic Activities (ISIC***  
10 6 ***Rev-4)***  
11

12 7 There is an outstanding number of SA spell in "General public administration activities",  
13 8 "*Hospital activities*", "*Retail sale in non-specialized stores with food, beverages or tobacco*  
14 9 *predominating*" and "General cleaning of buildings" (Table 5).  
15

16 10 However, when we analyze these cases by the number of affiliates in each occupational  
17 11 activities, those occupations in which we find the most SA spells are "Activities of call centres",  
18 12 "Temporary employment agency activities" and "General public administration activities"  
19

20 13

21  
22 14 **DISCUSSION**  
23

24 15 The obtained results confirm many of the findings described by other authors at both the  
25 16 national<sup>18</sup> and international levels<sup>19</sup>.  
26

27 17 If we analyse the SA prevalence in each Region, we observe that there are few Regions  
28 18 below the national average (Aragon and Community of Madrid). If we break down into  
29 19 non-work-related SA, the regions that are below the average are Andalusia, Aragon, the  
30 20 Balearic Islands, Community of Madrid, La Rioja and Valencian Community, while in  
31 21 work-related SA, Aragon, Catalonia, the Basque Country, the Canary Islands and  
32 22 Community of Madrid stand out below the average. It is difficult to know the reasons  
33 23 for these differences, as health systems and SA management mechanisms in each region  
34 24 are similar. To analyse the possible causes of these differences, it would be necessary to  
35 25 carry out other sorts of studies.  
36  
37  
38

39 26 There are also important differences concerning incidence, with these differences being  
40 27 very marked in some regions. Only Castile and Leon does not reach the national  
41 28 average. In the case of non-work-related SA, Andalusia, Castile and Leon, Extremadura  
42 29 and Valencian Community are below the national average. In work-related SA, values  
43 30 are very approximate in all regions. The highest value is in the Balearic Islands.  
44  
45

46 31 The incidence and prevalence are much higher in non-work-related SA than in work-  
47 32 related SA, which is logical, since work-related SA only include the accidents occurred  
48 33 in the workplace, as well as the professional diseases described in the Royal Decree  
49 34 1299/2006 of November 10<sup>th</sup>, and not all diseases, accidents, and injuries that any  
50 35 worker can suffer.  
51

52 36 There is a significant difference between the incidence of employees and that of self-  
53 37 employed workers, which is much higher in the former. This is in line with the results  
54 38 obtained in other studies conducted in Spain<sup>4</sup> and at an international level<sup>7,20,21</sup>.  
55  
56

57 39 Concerning average duration, the most noteworthy fact is that the number of days on  
58 40 sick leave for self-employed workers is double that of the rest of the workers in all of  
59 41 Spain's regions. In our experience, this may be caused by the fact that self-employed  
60

workers do not usually start a process of short-term SA, because cash benefits for SA are paid 30 days after the start of SA and they do not receive cash benefits in short-term SA. The average duration is shorter in all regions in the case of work-related SA because these SA are managed directly by associated Insurance Companies, whose network of doctors and hospital beds are exclusively for workers who have suffered occupational accidents or professional illness. In the case of non-work-related SA, health care is provided by the Public Health System, where other patients are also treated (children, elderly, non-working patients, etc.), so waiting lists are longer and treatments for these patients may be delayed further. Besides, the longest duration is for oncological diseases and mental disorders, the origin of which is usually unrelated to work. This finding is in line with that of other studies at the national<sup>4</sup> and European<sup>20</sup> level. Non-work-related SA shows a longer duration to work-related SA which has remained like this for years<sup>15</sup>. The region that shows the shortest duration as a whole is Navarre, where the health expenditure per inhabitant is also the highest in Spain. Healthcare expenditure is also higher in the Basque Country, however, the duration of the IT is one of the longest in many diagnostic chapters.

The differences observed in the number of employees regarding age and sex are in line with the patterns obtained in other studies, with higher incidence<sup>19</sup> and longer duration<sup>21</sup> in women. This occurs in all age ranges except for very young workers (men and women) and those over 65 years old. In young people, it could be explained by the fact that they often have low-skilled jobs (they haven't yet finished their education). They are often temporary and unstable jobs, and many young people work and study at the same time. This causes a double workload that could contribute to worsening your health. As we can see, they are short-term SA, which may indicate a low severity of the pathologies that produce them. In the over-65s the prevalence is very low, in all regions. One possible explanation is that the retirement age in Spain is around 65 and the worker who decides to continue working instead of retiring is in good health. However, the duration of these sick leaves is very long, because at this age there is a greater prevalence of serious pathologies (neoplasms, ictus, etc.).

There is a sex breach in some European countries (Spain, Ireland, France, Belgium, and United Kingdom) compared to others (Netherlands, Portugal, and Italy)<sup>22,23</sup>. The incidence increases with age, which is in agreement with most studies at the national<sup>4,24</sup> and international<sup>7,19,22,23-25</sup> level, with higher intensity according to the number of affiliates per sex and age range (Table 2). Among the multiple explanations for this fact, it is worth highlighting the following: the double work women usually carry out, i.e., paid work and domestic work, with greater responsibilities for the family (traditional gender role)<sup>23,25</sup>, the different behavior of women toward disease<sup>23</sup>, their greater morbidity related to maternity<sup>26</sup> and more fragile health<sup>27</sup>, as well as their lower commitment to work<sup>23</sup>. Other authors highlight the occupational differences, which could explain more than half of the gender differences<sup>25</sup>, as well as the stress level<sup>25</sup>. However, this gender breach is not constant in the long term in all the European countries<sup>23,21</sup>; in fact, some studies question its existence based on the occupational level<sup>28</sup> and the stress level<sup>29</sup>.

The longest duration by diagnostic group is in oncological diseases, cardiovascular diseases, and mental disorders, which is in line with other studies<sup>30-32</sup>. Moreover, this

1  
2  
3 1 fact poses a serious problem of public health, given the accelerated increase of chronic  
4 2 diseases in all the countries around Spain<sup>33</sup>, with the consequent increase in the  
5 3 incidence and duration of SA and the cost that it implies<sup>4,30</sup>.

7 4 The diagnosis that generates the largest number of SA cases, after the flu, is “*lower*  
8 5 *back pain*”. This finding is in line with numerous studies, being, globally, the main  
9 6 diagnosis of sick leave due to its high incidence and recurrence rate<sup>34</sup>, as well as to the  
10 7 duration<sup>24,35,36</sup> and economic costs of such sick leaves<sup>36</sup>. This is due to the great  
11 8 prevalence of such pathology, regardless of whether or not it generates SA cases<sup>34,37</sup>,  
12 9 among other factors.

15 10 The frequency of SA, as a function of the occupational activities, carried out by the  
16 11 worker, shows a clear disagreement with other studies, since workers of the Public  
17 12 Administration are in the 1<sup>st</sup>, 2<sup>nd</sup> and 3<sup>rd</sup> positions in the described ranking in almost all  
18 13 the Autonomous Communities. This could be explained by the difference between  
19 14 workers of the public sector, who represent a greater number of SA cases than  
20 15 employees in the private sector, as in other countries<sup>20,38,39</sup>. However, in previous  
21 16 studies carried out in Spain, the Public Administration did not represent or occupied  
22 17 such an important place in terms of SA frequency, being greatly surpassed by the  
23 18 industrial and construction sectors<sup>17,40</sup>.

27 19 When we analyze the SA spells by the number of affiliated workers in each  
28 20 occupational activities, we find a higher number of them in workers in call centres and  
29 21 temporary employment agencies. These activities have a high level of job instability,  
30 22 with a high worker turnover and very short term contracts. This could explain the high  
31 23 rate of absence in them.

34 24 One of the occupational activities with the highest number of SA spells is "Retail sale  
35 25 in non-specialized stores with food, beverages or tobacco predominating", but if we  
36 26 analyze it by the number of affiliates, this number of SA spells is one of the lowest of  
37 27 all occupational activities. One possible explanation is that many of these workers are  
38 28 self-employed and, as mentioned before, in these workers the SA incidence is very low.

## 43 30 **Conclusion**

45 31 This study shows the important characteristics of SA in Spain. The most important  
46 32 differences are found in SA incidence and average duration between the different  
47 33 Autonomous Communities and non-work-related and work-related SA spells. There are  
48 34 also important differences in the number of SA spells between the different  
49 35 occupational activities.

52 36 The regions that show the most difference are the Chartered Community of Navarre and  
53 37 the Community of Madrid. It would be interesting to carry out further studies that  
54 38 analyse the main factors that influence SA in Spain.

**Acknowledgments:** We would like to thank the National Institute of Social Security for helping with the databases.

**Contributorship statement:** MLAJ, MJAB, NMM, MTLM, and RMV conceived the original proposal and drafted the original manuscript. MLAJ, MJAB, NMM, and RMV contributed to the development and refinement and statistical analysis of the protocol. All authors critically appraised the drafted manuscript and made important intellectual contributions to the writing. All authors have read and approved the final submitted manuscript.

**Funding:** The University of Malaga through a predoctoral grant supports MLAJ, a Ph.D. student at the University.

**Conflicts of Interest:** All the authors declare that they have no conflict of interest.

**Patient consent for publication** Not required

**Data sharing statement:** All data relevant to the study are included in the article. Data are available in a public, open-access repository:

[www.seg-social.es/wps/portal/wss/internet/EstadisticasPresupuestosEstudios/](http://www.seg-social.es/wps/portal/wss/internet/EstadisticasPresupuestosEstudios/)

## KEY MESSAGES

### What is already known about this subject?

- Sickness absence (SA) is one of the main causes of work absenteeism, loss of productivity and workers' health, permanent disability, and greater risk of disease, unemployment, and death in Spain and nearby countries.
- Increasing efforts are being made to control SA and early reincorporation of workers who have suffered a period of SA due to disease or accident.

### What are the new findings?

- There is a much higher incidence in Spain among employees than among self-employed workers, whereas the average duration is much higher in the latter.
- There is a high frequency of SA spells among workers of the Public Administration in Spain, workers of call centers and workers of temporary employment agencies
- The Chartered Community of Navarre has the highest incidence and the shortest duration of SA spells
- The Community of Madrid has the lowest prevalence, incidence and average duration in work-related SA spells

### How could this affect clinical policies or practices in a predictable future?

- This implies the need to increase the effort to know the main factors that influence SA in Spain, the characteristics of the workers, and the activity they carry out.
- It is essential to implement a strict control of the diseases with greater incidence and prevalence, studying the age ranges, sex and the characteristics of the job in which they are produced, in order to reduce the negative effects on healthcare, social and economic costs.

1  
2  
3 **1 REFERENCES**  
4  
5 **2**  
6  
7 **3**  
8 **4**  
9 **5**  
10  
11 **6**  
12 **7**  
13 **8**  
14 **4.**  
15 **9**  
16  
17 **10**  
18 **11**  
19 **12**  
20  
21 **13**  
22 **14**  
23 **15**  
24 **16**  
25  
26 **17**  
27 **18**  
28 **19**  
29  
30 **20**  
31 **21**  
32 **22**  
33 **23**  
34 **24**  
35  
36 **25**  
37 **26**  
38  
39 **27**  
40 **28**  
41  
42 **29**  
43 **30**  
44 **31**  
45 **32**  
46  
47 **33**  
48 **34**  
49  
50 **35**  
51 **36**  
52  
53 **37**  
54 **38**  
55 **39**  
56  
57 **40**  
58 **41**  
59 **42**  
60 **43**

1. Spasova, S., Bouget, D., & Vanhercke, B. *Sick pay and sickness benefit schemes in the European Union. Background report for the Social Protection Committee's In-Depth Review on sickness benefits.* (2016). doi:10.2767/531076
2. Ministerio de Trabajo, M. y S. S. *Presupuestos de la Seguridad Social.* (2019).
3. Lusinyan, L. & Bonato, L. Work absence in Europe. *IMF Staff Pap.* **54**, 475–538 (2007).
4. Alba-Ramírez, A. La incapacidad temporal para el trabajo: análisis económico de su incidencia y su duración. *Univ. Carlos III. Madrid* **150**, (2009).
5. Peña Longobardo, L. M., Aranda Reneo, I., Oliva-Moreno, J. & Vall Castello, J. Evaluación de las pérdidas laborales provocadas enfermedades y lesiones en España en el año 2009. *Rev. Evaluación Programas y Políticas Públicas* **1**, 66 (2016).
6. Helgesson, M., Johansson, B., Nordqvist, T., Lundberg, I. & Vingard, E. Sickness absence at a young age and later sickness absence, disability pension, death, unemployment and income in native Swedes and immigrants. *Eur. J. Public Health* **25**, 688–692 (2015).
7. Virtanen, M. *et al.* Sickness absence as a risk factor for job termination, unemployment, and disability pension among temporary and permanent employees. *Occup. Environ. Med.* **63**, 212–217 (2006).
8. Salonen, L., Blomgren, J., Laaksonen, M. & Niemelä, M. Sickness absence as a predictor of disability retirement in different occupational classes: A register-based study of a working-age cohort in Finland in 2007–2014. *BMJ Open* **8**, 1–8 (2018).
9. Bryngelson, A. Long-term sickness absence and social exclusion. *Scand. J. Public Health* **37**, 839–845 (2009).
10. Ferrie, J. E. *et al.* Diagnosis-specific sickness absence and all-cause mortality in the GAZEL study. *J. Epidemiol. Community Health* **63**, 50–55 (2009).
11. Ferrie JE, Vahtera J, Kivimäki M, *et al.* Diagnosis-specific sickness absence and all-cause mortality in the GAZEL study. in
12. Kivimäki, M. *et al.* Sickness absence as a global measure of health: Evidence from mortality in the Whitehall II prospective cohort study. *Br. Med. J.* **327**, 364–368 (2003).
13. Gjesdal, S. *et al.* Mortality after long-term sickness absence: Prospective cohort study. *Eur. J. Public Health* **18**, 517–521 (2008).
14. Gimeno, D., Benavides, F. G., Benach, J. & Amick, B. C. Distribution of sickness absence in the European Union countries. *Occup. Environ. Med.* **61**, 867–869 (2004).
15. Benavides, F. G. *et al.* Evaluación de la gestión de los casos de incapacidad temporal por contingencia común de más de 15 días en Cataluña. *Gac. Sanit.* **24**, 215–219 (2010).
16. Vicente-Herrero, M. T., Terradillos García, M. J., Capdevila Garcia, L. M., Ramírez Iñiguez De La Torre, M. V. & López-González, Á. A. [Sick leaves caused by psychiatric diseases in Spain during 2011]. *Rev. Med. Chil.* **141**, 248–54 (2013).
17. Benavides, F.G., Plana, M., Serra, C., Dominguez, R., Despuig, M., Aguirre, S., Soria, M., Sampere, M., Gimeno, D. Return to Work After a Non-Work Related Sick Spell: The Role of Age, Sex, Economic Activity and Autonomous Community. *Original* **81**, 183–190 (2007).

- 1  
2  
3 1 18. Cuesta, M. Tasas de absentismo por enfermedad en España: datos para el periodo 1996-  
4 2 2004. *Cuad. Econ.* **35**, 1–8 (2012).
- 5  
6 3 19. Livanos, L. & Zangelidis, A. Sickness Absence: A Pan-European Study. *Munich Pers.*  
7 4 *RePEc Arch.* (2010).
- 8  
9 5 20. Rosta, J., Tellnes, G. & Aasland, O. G. Differences in sickness absence between self-  
10 6 employed and employed doctors: A cross-sectional study on national sample of  
11 7 Norwegian doctors in 2010. *BMC Health Serv. Res.* **14**, 1–8 (2014).
- 12  
13 8 21. Alba-Ramírez, A; López-Mourelo, E. Sickness absence from work in Spain: Are there  
14 9 gender differences? *UC3M Work. Pap.* **15–17**, (2017).
- 15  
16 10 22. Pekkala, J., Blomgren, J., Pietiläinen, O., Lahelma, E. & Rahkonen, O. Occupational  
17 11 class differences in long sickness absence: A register-based study of 2.1 million Finnish  
18 12 women and men in 1996-2013. *BMJ Open* **7**, 1–8 (2017).
- 19  
20 13 23. Mastekaasa, A. The gender gap in sickness absence: Long-term trends in eight European  
21 14 countries. *Eur. J. Public Health* **24**, 656–662 (2014).
- 22  
23 15 24. Álvarez Theurer, E., Llergo Muñoz, A. & Vaquero Abellán, M. Análisis de la duración  
24 16 de los periodos de incapacidad temporal por procesos en Andalucía. Factores asociados.  
25 17 *Aten. Primaria* **41**, 387–393 (2009).
- 26  
27 18 25. Laaksonen, M. *et al.* Gender differences in sickness absence - The contribution of  
28 19 occupation and workplace. *Scand. J. Work. Environ. Heal.* **36**, 394–403 (2010).
- 29  
30 20 26. Ariansen, A. M. S. Age, occupational class and sickness absence during pregnancy: A  
31 21 retrospective analysis study of the norwegian population registry. *BMJ Open* **4**, 1–9  
32 22 (2014).
- 33  
34 23 27. Llobet, C. V., Banqué, M., Fuentes, M. & Ojuel, J. Morbilidad diferencial entre mujeres  
35 24 y hombres. *Anu. Psicol.* **39**, 9–22 (2008).
- 36  
37 25 28. Løset, G. K. *et al.* Gender equality in sickness absence tolerance: Attitudes and norms of  
38 26 sickness absence are not different for men and women. *PLoS One* **13**, 1–18 (2018).
- 39  
40 27 29. Mastekaasa, A. & Melsom, A. M. Occupational segregation and gender differences in  
41 28 sickness absence : Evidence from 17 European countries Acknowledgement : We are  
42 29 grateful to the European Commission , Eurostat and to the original collecting agencies  
43 30 for access to the EU LFS ( 2008 relea.
- 44  
45 31 30. Ármannsdóttir, B., Mårdby, A. C., Haukenes, I. & Hensing, G. Cumulative incidence of  
46 32 sickness absence and disease burden among the newly sick-listed, a cross-sectional  
47 33 population-based study. *BMC Public Health* **13**, (2013).
- 48  
49 34 31. Zhang, W., McLeod, C. & Koehoorn, M. The relationship between chronic conditions  
50 35 and absenteeism and associated costs in Canada. *Scand. J. Work. Environ. Heal.* **42**,  
51 36 413–422 (2016).
- 52  
53 37 32. Jakovljevic, M., Malmose-Stapelfeldt, C., Milovanovic, O., Rancic, N. & Bokonjic, D.  
54 38 Disability, Work Absenteeism, Sickness Benefits, and Cancer in Selected European  
55 39 OECD Countries—Forecasts to 2020. *Front. Public Heal.* **5**, 1–8 (2017).
- 56  
57 40 33. Nexø, M. A. *et al.* Long-term sickness absence of 32 chronic conditions: A Danish  
58 41 register-based longitudinal study with up to 17 years of follow-up. *BMJ Open* **8**, 1–10  
59 42 (2018).
- 60  
43 34. Hestbaek, L., Leboeuf-Yde, C. & Manniche, C. Low back pain: what is the long-term  
44 course? A review of studies of general patient populations. *Eur. Spine J.* **12**, 149–165  
45 (2003).

1  
2  
3  
4  
5  
6  
7  
8  
9  
10  
11  
12  
13  
14  
15  
16  
17  
18  
19  
20  
21  
22  
23  
24  
25  
26  
27  
28  
29  
30  
31  
32  
33  
34  
35  
36  
37  
38  
39  
40  
41  
42  
43  
44  
45  
46  
47  
48  
49  
50  
51  
52  
53  
54  
55  
56  
57  
58  
59  
60

- 1 35. Steenstra, I. A., Verbeek, J. H., Heymans, M. W. & Bongers, P. M. Prognostic factors  
2 for duration of sick leave in patients sick listed with acute low back pain: A systematic  
3 review of the literature. *Occup. Environ. Med.* **62**, 851–860 (2005).
- 4 36. Diaz-Ledezma, C. *et al.* Factors associated with variability in length of sick leave  
5 because of acute low back pain in Chile. *Spine J.* **9**, 1010–1015 (2009).
- 6 37. Crook, J., Milner, R., Schultz, I. Z. & Stringer, B. Determinants of occupational  
7 disability following a low back injury: A critical review of the literature. *Handb.*  
8 *Complex Occup. Disabil. Claims Early Risk Identification, Interv. Prev.* **12**, 169–189  
9 (2005).
- 10 38. Oke, A., Braithwaite, P. & Antai, D. Sickness absence and precarious employment: A  
11 comparative cross-national study of Denmark, Finland, Sweden, and Norway. *Int. J.*  
12 *Occup. Environ. Med.* **7**, 125–147 (2016).
- 13 39. Alexopoulos, E. C. *et al.* Sickness absence in the private sector of Greece: Comparing  
14 shipyard industry and national insurance data. *Int. J. Environ. Res. Public Health* **9**,  
15 1171–1181 (2012).
- 16 40. G. Benavides, F., Zaballa, E., Sanchez-Niubo, A., Gimeno Ruiz de Porras, D. & Duran,  
17 X. Incidence of non-work-related sickness absence in Spain by economic activity of the  
18 company. *Arch. Prev. Riesgos Labor.* **20**, 14–25 (2017).

## Table legends

- 24 Table 1: Prevalence, incidence and average duration of sickness absence in Spain (2018)
- 25 Table 2. Sickness absence and average duration, by age and sex
- 26 Table 3. Average duration by diagnosis chapter (ICD-10)
- 27 Table 4. Sickness absence spells by specific diagnosis (ICD-10)
- 28 Table 5. Sickness absence spells by occupational activities (International Standard Industrial  
29 Classification of all Economic Activities, ISIC Rev-4)



Table 1: Prevalence, incidence and average duration of sickness absence in Spain (2018)

|                                | PREVALENCE          |               |              | INCIDENCE           |               |              | AVERAGE DURATION    |               |              |
|--------------------------------|---------------------|---------------|--------------|---------------------|---------------|--------------|---------------------|---------------|--------------|
|                                | NON-WORK-RELATED SA |               | WORK-RELATED | NON-WORK-RELATED SA |               | WORK-RELATED | NON-WORK-RELATED SA |               | WORK-RELATED |
|                                | EMPLOYED            | SELF-EMPLOYED |              | EMPLOYED            | SELF-EMPLOYED |              | EMPLOYED            | SELF-EMPLOYED |              |
| ANDALUSIA                      | 29,41               | 31,43         | 4,26         | 19,72               | 9,28          | 3,98         | 44,79               | 98,35         | 37,24        |
| ARAGON                         | 32,52               | 30,48         | 3,94         | 25,95               | 11,15         | 3,39         | 36,47               | 75,45         | 41,45        |
| PRINCIPALITY of ASTURIAS       | 36                  | 38,96         | 5,01         | 18,73               | 10,85         | 3,53         | 58,55               | 105,03        | 47,08        |
| BALEARIC ISLANDS               | 31,29               | 21,7          | 4,72         | 27,02               | 6,46          | 5,15         | 33,02               | 84,01         | 30,94        |
| CANARY ISLANDS                 | 40,45               | 26,45         | 3,85         | 25,23               | 7,96          | 3,51         | 48,53               | 100,87        | 38,17        |
| CANTABRIA                      | 39,77               | 38,68         | 4,84         | 23,38               | 10,92         | 3,18         | 51,39               | 108,36        | 50,14        |
| CASTILE and LEON               | 32,68               | 31,71         | 4,35         | 19,46               | 9,15          | 3,44         | 47,95               | 95,36         | 42,07        |
| CASTILE LA MANCHA              | 32,4                | 35,57         | 4,48         | 19,91               | 9,93          | 3,96         | 46,02               | 98,54         | 38,08        |
| CATALONIA                      | 35,14               | 28,76         | 3,8          | 36,37               | 10,17         | 3,6          | 28,54               | 83,48         | 36,06        |
| EXTREMADURA                    | 31,59               | 38,9          | 4,64         | 12,76               | 8,94          | 3,68         | 67,53               | 112,86        | 41,42        |
| GALICIA                        | 39,79               | 44,29         | 5,51         | 18,52               | 10,54         | 3,57         | 61,39               | 111,82        | 49,83        |
| COMMUNITY of MADRID            | 29,17               | 20,79         | 2,73         | 25,54               | 7,71          | 2,89         | 33,89               | 77,75         | 33,11        |
| MURCIA                         | 35,55               | 40,63         | 4,12         | 20,21               | 11,33         | 3,39         | 48,39               | 98,49         | 40,2         |
| CHARTERED COMMUNITY of NAVARRA | 35,73               | 30,72         | 4,28         | 43,87               | 16,46         | 3,88         | 24,64               | 55,15         | 37,86        |
| LA RIOJA                       | 27,3                | 25,65         | 4,41         | 25,28               | 10,91         | 3,91         | 34,53               | 69,95         | 38,87        |

|                       |       |       |      |       |       |      |       |       |       |
|-----------------------|-------|-------|------|-------|-------|------|-------|-------|-------|
| <b>VALENCIA</b>       | 30,68 | 29,28 | 4,4  | 18,06 | 8,79  | 3,34 | 49,29 | 96,3  | 42,34 |
| <b>BASQUE COUNTRY</b> | 39,58 | 28,3  | 3,84 | 31,15 | 10,52 | 3,96 | 38,16 | 79,6  | 36,55 |
| <b>NATIONAL TOTAL</b> | 32,98 | 30,48 | 3,99 | 24,98 | 9,51  | 3,55 | 38,81 | 91,38 | 38,23 |

For peer review only

Table 2. Sickness absence spells by age and sex

|                  | ANDALUSIA                  |            | ARAGON     |           | P. OF ASTURIAS |           | BALEARIC ISLANDS |           | CANARY ISLANDS |            | CANTABRIA  |           | CASTILE AND LEON |            | CASTILE LA MANCHA |           | CATALONIA  |            | EXTREMADURA |           | GALICIA   |            | COMMUNITY OF MADRID |            | REGION OF MURCIA |           | C. C. OF NAVARRE |           | LA RIOJA  |           | VALENCIA  |            | BASQUE COUNTRY |            |            |
|------------------|----------------------------|------------|------------|-----------|----------------|-----------|------------------|-----------|----------------|------------|------------|-----------|------------------|------------|-------------------|-----------|------------|------------|-------------|-----------|-----------|------------|---------------------|------------|------------------|-----------|------------------|-----------|-----------|-----------|-----------|------------|----------------|------------|------------|
|                  | Woman                      | Man        | Woman      | Man       | Woman          | Man       | Woman            | Man       | Woman          | Man        | Woman      | Man       | Woman            | Man        | Woman             | Man       | Woman      | Man        | Woman       | Man       | Woman     | Man        | Woman               | Man        | Woman            | Man       | Woman            | Man       | Woman     | Man       | Woman     | Man        | Woman          | Man        |            |
| 16-25            | Total workforce            | 28.519     | 30.319     | 7.211     | 9.576          | 1.836     | 2.100            | 11.010    | 10.470         | 11.404     | 9.813      | 2.235     | 2.292            | 6.859      | 9.934             | 7.294     | 10.106     | 92.204     | 83.921      | 2.064     | 2.793     | 6.082      | 7.549               | 43.592     | 42.510           | 5.649     | 7.818            | 5.488     | 7.886     | 1.457     | 2.034     | 15.154     | 18.327         | 8.401      | 12.209     |
|                  | Average affiliated workers | 6852.40    | 89.788.42  | 12715.03  | 17.792.34      | 5368.35   | 6.294.17         | 16392.26  | 19.260.69      | 19549.26   | 23.478.52  | 3792.28   | 4.565.60         | 16025.01   | 22.400.00         | 13405.17  | 21.951.23  | 112945.81  | 122.308.48  | 7057.99   | 11.732.44 | 17279.67   | 21.582.01           | 81635.82   | 97.705.09        | 13971.74  | 19.847.78        | 6659.14   | 8.653.16  | 2699.60   | 2.696.28  | 46147.56   | 56.875.39      | 17735.00   | 22.613.08  |
|                  | SA/1000 affiliates         | 34.67      | 28.14      | 47.26     | 44.85          | 28.5      | 27.8             | 55.97     | 45.29          | 48.61      | 34.82      | 49.11     | 41.83            | 35.67      | 36.96             | 45.34     | 38.36      | 68.02      | 57.17       | 24.37     | 19.83     | 29.33      | 29.14               | 44.5       | 36.25            | 33.69     | 32.82            | 68.67     | 75.94     | 44.97     | 45.85     | 27.36      | 26.85          | 39.47      | 44.99      |
|                  | Total days of SA           | 834.572    | 846.610    | 131.509   | 167.205        | 50.471    | 56.482           | 185.291   | 178.221        | 309.354    | 231.868    | 48.036    | 48.391           | 167.468    | 222.267           | 309.354   | 242.410    | 1.358.613  | 1.249.511   | 94.375    | 105.025   | 231.248    | 264.978             | 659.008    | 707.760          | 189.971   | 225.126          | 70.415    | 105.159   | 26.249    | 38.326    | 434.028    | 500.328        | 170.994    | 232.766    |
| Average duration | 29                         | 27         | 18         | 17        | 27             | 26        | 16               | 17        | 27             | 23         | 21         | 21        | 24               | 22         | 42                | 23        | 14         | 14         | 45          | 37        | 38        | 35         | 15                  | 16         | 33               | 28        | 12               | 13        | 18        | 18        | 28        | 27         | 20             | 19         |            |
| 26-35            | Total workforce            | 100.686    | 86.518     | 20.411    | 20.921         | 7.876     | 8.438            | 22.333    | 19.262         | 32.182     | 25.520     | 7.126     | 6.214            | 23.829     | 23.851            | 22.958    | 23.179     | 195.844    | 166.163     | 8.168     | 6.905     | 25.440     | 23.811              | 126.980    | 102.745          | 19.347    | 18.506           | 5.488     | 7.886     | 1.457     | 2.034     | 15.154     | 18.327         | 8.401      | 12.209     |
|                  | Average affiliated workers | 300.358.69 | 330.969.33 | 48.943.45 | 55.044.50      | 29.131.98 | 30.748.08        | 51.679.23 | 54.743.11      | 80.321.79  | 82.314.91  | 18.686.60 | 19.468.05        | 73.916.47  | 83.188.54         | 59.795.11 | 75.578.35  | 310.001.82 | 347.500.15  | 36.076.74 | 41.472.33 | 88.778.42  | 92.930.24           | 334.003.39 | 351.427.98       | 53.485.35 | 64.162.37        | 23.761.08 | 27.464.21 | 11.184.28 | 11.558.26 | 169.672.13 | 189.654.50     | 72.276.88  | 83.898.41  |
|                  | SA/1000 affiliates         | 27.93      | 21.78      | 34.75     | 31.67          | 22.53     | 22.87            | 36.01     | 29.32          | 33.39      | 25.84      | 31.78     | 26.60            | 26.86      | 23.89             | 32.00     | 25.55      | 52.65      | 39.85       | 18.87     | 13.87     | 23.88      | 21.35               | 31.68      | 24.36            | 30.14     | 24.04            | 52.48     | 51.62     | 33.13     | 36.82     | 24.45      | 19.81          | 37.83      | 34.70      |
|                  | Total days of SA           | 4.002.601  | 2.741.036  | 613.970   | 475.288        | 326.129   | 321.994          | 596.265   | 434.597        | 1.290.175  | 833.828    | 282.294   | 203.621          | 918.856    | 733.947           | 927.034   | 686.484    | 4.915.171  | 3.405.555   | 475.765   | 307.251   | 1.289.570  | 1.018.756           | 3.636.681  | 2.344.947        | 882.767   | 621.458          | 325.739   | 275.255   | 127.536   | 108.671   | 2.207.518  | 1.512.322      | 1.228.249  | 847.290    |
| Average duration | 39                         | 31         | 30         | 22        | 41             | 38        | 26               | 22        | 40             | 32         | 39         | 32        | 38               | 30         | 40                | 29        | 25         | 20         | 58          | 44        | 50        | 42         | 28                  | 22         | 45               | 33        | 21               | 16        | 28        | 21        | 44        | 33         | 35             | 24         |            |
| 36-45            | Total workforce            | 118.614    | 117.512    | 25.565    | 26.492         | 13.494    | 14.020           | 23.709    | 22.637         | 40.199     | 35.601     | 10.016    | 9.757            | 31.594     | 32.035            | 26.742    | 29.050     | 221.680    | 205.633     | 9.621     | 9.250     | 38.674     | 35.964              | 151.187    | 125.041          | 23.103    | 24.813           | 20.685    | 22.630    | 5.864     | 6.555     | 63.233     | 65.615         | 51.452     | 55.641     |
|                  | Average affiliated workers | 416.547.17 | 493.349.53 | 73.820.89 | 88.587.25      | 53.033.04 | 57.508.87        | 72.634.45 | 79.189.07      | 113.319.60 | 124.332.39 | 31.436.56 | 34.354.87        | 116.512.04 | 134.105.28        | 85.921.38 | 117.415.38 | 467.172.39 | 538.140.86  | 51.846.68 | 57.864.40 | 154.779.30 | 159.073.44          | 448.746.41 | 492.003.79       | 74.900.72 | 103.493.33       | 37.428.06 | 44.894.12 | 18.530.51 | 19.654.64 | 256.013.07 | 308.714.88     | 131.005.73 | 147.561.07 |
|                  | SA/1000 affiliates         | 23.73      | 19.85      | 28.86     | 24.92          | 21.20     | 20.32            | 27.20     | 23.82          | 29.56      | 23.86      | 26.55     | 23.67            | 22.60      | 19.91             | 25.94     | 20.62      | 39.54      | 31.96       | 15.46     | 13.32     | 20.82      | 18.84               | 28.08      | 21.18            | 25.70     | 19.98            | 46.06     | 42.02     | 26.37     | 27.79     | 20.58      | 17.71          | 32.73      | 31.42      |
|                  | Total days of SA           | 5485098    | 4853604    | 1017787   | 884342         | 729537    | 710147           | 871595    | 690262         | 1984219    | 1537765    | 522327    | 427368           | 1601141    | 1341221           | 1320806   | 1180792    | 7299940    | 5952905     | 684002    | 523399    | 2405243    | 1925240             | 5625202    | 4022176          | 1271496   | 1132594          | 584891    | 515533    | 216891    | 196201    | 3345778    | 2905621        | 2137768    | 1898819    |
| Average duration | 46                         | 41         | 39         | 33        | 54             | 50        | 36               | 30        | 49             | 43         | 52         | 43        | 50               | 41         | 49                | 40        | 32         | 28         | 71          | 56        | 62        | 53         | 37                  | 32         | 55               | 45        | 28               | 22        | 36        | 29        | 52        | 44         | 41             | 34         |            |
| 46-55            | Total workforce            | 93419      | 97446      | 20531     | 21134          | 12107     | 11379            | 19560     | 18340          | 33484      | 32340      | 7739      | 7993             | 27137      | 28786             | 20740     | 24528      | 161373     | 145283      | 9133      | 9654      | 32304      | 30656               | 116428     | 97152            | 17870     | 19928            | 17679     | 17432     | 4652      | 5523      | 52477      | 56490          | 44669      | 47083      |
|                  | Average affiliated workers | 376667.85  | 452781.53  | 72642.41  | 86832.17       | 50430.1   | 54182.72         | 59519.62  | 70647.25       | 103329.08  | 124900.1   | 27966.17  | 32274.09         | 121691.32  | 144244.47         | 78676.23  | 113500.26  | 420095.39  | 483766.12   | 48959.11  | 61304.89  | 155675.61  | 146483              | 392653.45  | 435113.09        | 63760.45  | 88653.91         | 36669.67  | 43790.26  | 16865.87  | 19151.91  | 227708.97  | 286020.66      | 132334.79  | 149918.57  |
|                  | SA/1000 affiliates         | 20.67      | 17.93      | 23.55     | 20.28          | 20.01     | 17.50            | 27.39     | 21.63          | 27.00      | 21.58      | 23.06     | 20.64            | 18.58      | 16.63             | 21.97     | 18.01      | 32.01      | 25.03       | 15.55     | 13.12     | 17.29      | 17.44               | 24.71      | 18.61            | 23.36     | 18.73            | 40.18     | 33.17     | 22.99     | 24.03     | 19.20      | 16.46          | 28.13      | 26.17      |
|                  | Total days of SA           | 5669205    | 5761219    | 1161473   | 1064204        | 892531    | 800712           | 986970    | 817858         | 2095638    | 1869968    | 514677    | 492931           | 1843156    | 1685686           | 1339820   | 1442138    | 7170290    | 6146120     | 756791    | 756088    | 2592300    | 2196003             | 5597323    | 4348939          | 1266827   | 1234944          | 690509    | 631366    | 226762    | 248332    | 3621543    | 3415316        | 2402084    | 2300411    |
| Average duration | 60                         | 59         | 56         | 50        | 73             | 70        | 50               | 44        | 62             | 57         | 66         | 61        | 67               | 58         | 64                | 58        | 44         | 42         | 82          | 78        | 80        | 71         | 48                  | 44         | 70               | 61        | 39               | 36        | 48        | 44        | 69        | 60         | 53             | 48         |            |
| 56-65            | Total workforce            | 54794      | 55337      | 13132     | 12022          | 9140      | 7504             | 11512     | 9850           | 16303      | 15530      | 5491      | 5206             | 18430      | 19782             | 11693     | 14709      | 85972      | 74294       | 6060      | 6574      | 22907      | 19711               | 67732      | 53708            | 11580     | 11798            | 9312      | 8423      | 2931      | 3133      | 33820      | 33628          | 28812      | 26181      |
|                  | Average affiliated workers | 225629.08  | 261355.04  | 45478.18  | 56875.03       | 34528.21  | 37293.19         | 34180.32  | 40291.24       | 48415.01   | 64110.82   | 18313.97  | 22216.8          | 81337.65   | 106472.69         | 44685.46  | 72066.5    | 237960.81  | 279504.05   | 30888.53  | 42159.4   | 87344.91   | 92663.59            | 217723.25  | 240497.55        | 35155.93  | 48115.93         | 21505.51  | 26507.11  | 10467.84  | 13056.28  | 128808.03  | 166094.89      | 82120.99   | 95280.63   |
|                  | SA/1000 affiliates         | 20.24      | 17.64      | 24.06     | 17.61          | 22.06     | 16.77            | 28.07     | 20.37          | 28.06      | 20.19      | 24.99     | 19.53            | 18.88      | 15.48             | 21.81     | 17.01      | 30.11      | 22.15       | 16.35     | 12.99     | 21.85      | 17.73               | 25.93      | 18.61            | 27.45     | 20.43            | 36.08     | 26.48     | 23.33     | 20.00     | 21.88      | 16.87          | 29.24      | 22.90      |

|                  |         |         |        |        |        |        |        |        |         |         |        |        |         |         |        |         |         |         |        |        |         |         |         |         |         |        |        |        |        |        |         |         |         |         |
|------------------|---------|---------|--------|--------|--------|--------|--------|--------|---------|---------|--------|--------|---------|---------|--------|---------|---------|---------|--------|--------|---------|---------|---------|---------|---------|--------|--------|--------|--------|--------|---------|---------|---------|---------|
| Total days of SA | 4016323 | 4392212 | 954029 | 886164 | 799503 | 654003 | 722340 | 644055 | 1270661 | 1239034 | 458470 | 446106 | 1611454 | 1563351 | 971777 | 1205977 | 5269955 | 4690436 | 567570 | 631405 | 2297445 | 1810405 | 4144067 | 3305759 | 1026123 | 969808 | 478852 | 457600 | 200637 | 200286 | 2884959 | 2773183 | 2023474 | 1882291 |
| Average duration | 73      | 79      | 72     | 73     | 87     | 87     | 62     | 65     | 77      | 79      | 83     | 85     | 87      | 79      | 83     | 81      | 61      | 63      | 95     | 96     | 100     | 91      | 61      | 61      | 88      | 82     | 51     | 54     | 68     | 63     | 85      | 82      | 70      | 71      |

  

|                            |          |          |         |         |         |         |         |         |       |         |         |        |         |         |         |         |          |          |         |         |         |        |          |          |         |         |        |         |        |        |         |         |         |         |
|----------------------------|----------|----------|---------|---------|---------|---------|---------|---------|-------|---------|---------|--------|---------|---------|---------|---------|----------|----------|---------|---------|---------|--------|----------|----------|---------|---------|--------|---------|--------|--------|---------|---------|---------|---------|
| Total workforce            | 1009     | 912      | 218     | 229     | 143     | 135     | 248     | 248     | 405   | 507     | 93      | 90     | 309     | 369     | 222     | 243     | 1499     | 1783     | 109     | 118     | 496     | 416    | 1427     | 1472     | 209     | 205     | 97     | 99      | 48     | 53     | 565     | 586     | 395     | 395     |
| Average affiliated workers | 11950.42 | 13802.04 | 2562.05 | 3147.87 | 2035.13 | 1864.38 | 2749.35 | 3794.28 | 3761  | 6238.89 | 1063.87 | 1151.9 | 4800.68 | 6608.46 | 2729.33 | 3896.45 | 16654.52 | 21595.24 | 1635.76 | 2118.84 | 6019.34 | 6010.7 | 14815.19 | 17812.54 | 2137.48 | 2850.03 | 976.63 | 1251.16 | 558.86 | 884.86 | 7419.14 | 9562.67 | 3943.04 | 4299.16 |
| SA/1000 affiliates         | 7.04     | 5.51     | 7.09    | 6.06    | 5.86    | 6.03    | 7.52    | 5.45    | 8.97  | 6.77    | 7.28    | 6.51   | 5.36    | 4.65    | 6.78    | 5.20    | 7.50     | 6.88     | 5.55    | 4.64    | 6.87    | 5.77   | 8.03     | 6.89     | 8.15    | 5.99    | 8.28   | 6.59    | 7.16   | 4.99   | 6.35    | 5.11    | 8.35    | 7.66    |
| Total days of SA           | 102994   | 86720    | 22938   | 20767   | 14254   | 15093   | 19474   | 21387   | 42070 | 54105   | 9941    | 8986   | 33554   | 36135   | 30606   | 23582   | 137904   | 164426   | 14652   | 13172   | 60119   | 49220  | 115468   | 116354   | 28423   | 19951   | 7095   | 8826    | 5266   | 4674   | 63313   | 59850   | 38371   | 34999   |
| Average duration           | 102      | 95       | 105     | 90      | 99      | 111     | 78      | 86      | 103   | 106     | 106     | 99     | 108     | 97      | 137     | 97      | 91       | 92       | 134     | 111     | 121     | 118    | 80       | 79       | 135     | 97      | 73     | 89      | 109    | 88     | 112     | 102     | 97      | 88      |

Table 3. Average duration by diagnosis chapter (ICD-10)

| DIAGNOSIS CHAPTER (I)                                                                                          | ANDALUSIA | ARAGON | P. OF ASTURIAS | BALEARIC ISLANDS | CANARY ISLANDS | CANTABRIA | CASTILE LEON | CASTILE LA MANCHA | CATALONIA | EXTREMADURA | GALICIA | COMMUNITY OF MADRID | REGION OF MURCIA | C. C. OF NAVARRRE | LA RIOJA | VALENCIA | BASQUE COUNTRY |
|----------------------------------------------------------------------------------------------------------------|-----------|--------|----------------|------------------|----------------|-----------|--------------|-------------------|-----------|-------------|---------|---------------------|------------------|-------------------|----------|----------|----------------|
| <i>I Certain infectious and parasitic diseases</i>                                                             | 14,91     | 7,87   | 9,33           | 5,50             | 9,13           | 6,40      | 14,69        | 14,89             | 5,09      | 16,92       | 17,39   | 6,58                | 8,03             | 3,87              | 4,69     | 9,50     | 9,19           |
| <i>II Neoplasms</i>                                                                                            | 109,78    | 120,16 | 131,05         | 123,93           | 102,69         | 113,30    | 124,41       | 131,66            | 99,47     | 136,05      | 134,20  | 87,92               | 109,89           | 105,09            | 104,53   | 121,97   | 142,86         |
| <i>III Diseases of the blood and blood-forming organs and certain disorders involving the immune mechanism</i> | 91,98     | 97,53  | 76,71          | 61,03            | 83,72          | 57,30     | 76,59        | 83,38             | 63,33     | 121,10      | 94,43   | 63,74               | 89,23            | 40,54             | 58,16    | 85,98    | 108,07         |
| <i>IV Endocrine, nutritional and metabolic diseases</i>                                                        | 72,54     | 67,72  | 66,06          | 50,60            | 64,70          | 81,62     | 57,53        | 72,88             | 59,03     | 78,47       | 88,73   | 56,96               | 81,66            | 43,03             | 48,54    | 71,53    | 81,06          |
| <i>V Mental and behavioural disorders</i>                                                                      | 95,17     | 90,37  | 99,28          | 56,11            | 83,26          | 111,34    | 95,30        | 94,54             | 72,03     | 114,42      | 110,52  | 78,88               | 111,86           | 65,66             | 70,64    | 98,46    | 116,66         |
| <i>VI Diseases of the nervous system</i>                                                                       | 79,81     | 61,81  | 85,12          | 49,46            | 70,50          | 65,51     | 78,55        | 74,37             | 44,98     | 80,11       | 95,84   | 54,49               | 78,03            | 26,40             | 44,64    | 79,21    | 70,51          |
| <i>VII Diseases of the eye and adnexa</i>                                                                      | 44,13     | 42,99  | 47,85          | 28,72            | 40,94          | 45,41     | 45,05        | 44,12             | 29,17     | 56,76       | 48,63   | 29,62               | 46,43            | 18,80             | 29,77    | 41,70    | 45,77          |
| <i>VIII Diseases of the ear and mastoid process</i>                                                            | 33,04     | 26,90  | 33,55          | 18,33            | 31,33          | 29,05     | 27,30        | 26,82             | 18,89     | 47,66       | 42,55   | 21,63               | 35,98            | 13,85             | 18,54    | 29,13    | 37,40          |
| <i>IX Diseases of the circulatory system</i>                                                                   | 103,40    | 107,05 | 102,25         | 85,73            | 90,19          | 108,21    | 99,35        | 104,24            | 79,86     | 106,57      | 111,53  | 76,86               | 112,64           | 80,66             | 90,12    | 101,52   | 119,39         |
| <i>X Diseases of the respiratory system</i>                                                                    | 11,98     | 10,67  | 14,22          | 9,05             | 12,46          | 11,07     | 13,02        | 13,47             | 8,27      | 19,76       | 16,42   | 9,70                | 12,34            | 6,40              | 7,68     | 11,87    | 17,11          |
| <i>XI Diseases of the digestive system</i>                                                                     | 30,65     | 35,44  | 44,16          | 28,59            | 39,97          | 43,95     | 21,86        | 35,59             | 27,19     | 50,51       | 47,53   | 32,56               | 41,01            | 14,97             | 30,98    | 40,84    | 37,32          |
| <i>XII Diseases of the skin and subcutaneous tissue</i>                                                        | 36,37     | 29,84  | 46,22          | 24,18            | 35,30          | 42,96     | 37,86        | 37,34             | 25,36     | 39,37       | 47,80   | 28,91               | 39,30            | 20,61             | 27,26    | 33,74    | 51,91          |

|                                                                                                      |       |       |       |       |       |        |       |        |       |       |       |       |       |       |       |       |       |
|------------------------------------------------------------------------------------------------------|-------|-------|-------|-------|-------|--------|-------|--------|-------|-------|-------|-------|-------|-------|-------|-------|-------|
| <i>XIII Diseases of the musculoskeletal system and connective tissue</i>                             | 70,24 | 66,93 | 79,55 | 50,35 | 65,45 | 75,67  | 70,00 | 71,17  | 54,13 | 85,89 | 85,54 | 56,26 | 73,79 | 43,11 | 52,76 | 71,05 | 92,61 |
| <i>XIV Diseases of the genitourinary system</i>                                                      | 40,71 | 31,78 | 44,27 | 25,30 | 35,36 | 34,11  | 35,01 | 33,76  | 27,97 | 46,14 | 45,16 | 31,83 | 43,51 | 15,56 | 32,25 | 37,08 | 52,86 |
| <i>XV Pregnancy, childbirth and the puerperium</i>                                                   | 76,91 | 53,45 | 51,51 | 53,46 | 81,32 | 61,09  | 59,29 | 72,56  | 63,73 | 70,08 | 68,09 | 51,74 | 73,30 | 60,24 | 57,10 | 73,43 | 67,00 |
| <i>XVII Congenital malformations, deformations and chromosomal abnormalities</i>                     | 86,30 | 69,19 | 56,00 | 73,00 | 86,22 | 121,65 | 80,30 | 107,03 | 61,09 | 94,00 | 99,25 | 41,00 | 75,00 | 50,00 | 37,76 | 71,33 | 90,33 |
| <i>XVIII Symptoms, signs and abnormal clinical and laboratory findings, not elsewhere classified</i> | 36,13 | 29,88 | 38,00 | 23,00 | 26,00 | 42,50  | 33,23 | 36,11  | 20,82 | 38,50 | 37,25 | 28,00 | 51,00 | 9,00  | 28,45 | 31,67 | 37,67 |
| <i>XIX Injury, poisoning and certain other consequences of external causes</i>                       | 59,88 | 59,12 | 72,00 | 45,00 | 59,00 | 69,17  | 66,63 | 52,48  | 53,12 | 70,00 | 71,75 | 55,00 | 65,00 | 45,00 | 53,45 | 58,67 | 81,00 |

(1) Chapters XX, XXI y XXII are not included because the number of cases is not significant

Table 4. Sickness absence spells by specific diagnosis (ICD-10)

| Autonomous Community of Spain   | Code                    | Specific diagnosis                                                       | Sickness absence spells/per year                      |
|---------------------------------|-------------------------|--------------------------------------------------------------------------|-------------------------------------------------------|
| <b>Andalusia</b>                | M54.5                   | Low back pain                                                            | 41.884                                                |
|                                 | K52                     | Other noninfective gastroenteritis and colitis                           | 30.794                                                |
|                                 | J00                     | Acute nasopharyngitis (common cold)                                      | 25.633                                                |
|                                 | J11                     | Influenza, virus not identified                                          | 25.345                                                |
|                                 | M54.2                   | Cervicalgia                                                              | 17.463                                                |
|                                 | M54.3                   | Sciatica                                                                 | 16.141                                                |
|                                 | J02.9                   | Acute pharyngitis, unspecified                                           | 12.318                                                |
|                                 | J03.9                   | Acute tonsillitis, unspecified                                           | 11.617                                                |
|                                 | <b>Aragon</b>           | K52.9                                                                    | Noninfective gastroenteritis and colitis, unspecified |
| J11                             |                         | Influenza, virus not identified                                          | 8.383                                                 |
| M54.5                           |                         | Low back pain                                                            | 7.565                                                 |
| J02.9                           |                         | Acute pharyngitis, unspecified                                           | 6.373                                                 |
| M25                             |                         | Other joint disorders, not elsewhere classified                          | 4.952                                                 |
| M54.3                           |                         | Sciatica                                                                 | 2.743                                                 |
| M54.2                           |                         | Cervicalgia                                                              | 2.693                                                 |
| F41                             |                         | Other anxiety disorders                                                  | 2.487                                                 |
| <b>Principality of Asturias</b> |                         | K52.9                                                                    | Noninfective gastroenteritis and colitis, unspecified |
|                                 | M54.5                   | Low back pain                                                            | 3.485                                                 |
|                                 | F41                     | Other anxiety disorders                                                  | 3.369                                                 |
|                                 | J11                     | Influenza, virus not identified                                          | 2.311                                                 |
|                                 | M54.3                   | Sciatica                                                                 | 1.937                                                 |
|                                 | M54.2                   | Cervicalgia                                                              | 1.706                                                 |
|                                 | J02.9                   | Acute pharyngitis, unspecified                                           | 1.256                                                 |
|                                 | M23                     | Internal derangement of knee                                             | 1.237                                                 |
|                                 | <b>Balearic Islands</b> | K52.9                                                                    | Noninfective gastroenteritis and colitis, unspecified |
| M54.5                           |                         | Low back pain                                                            | 7.985                                                 |
| B97.8                           |                         | Other viral agents as the cause of diseases classified to other chapters | 6.260                                                 |
| J11                             |                         | Influenza, virus not identified                                          | 5.697                                                 |
| F41.9                           |                         | Anxiety disorder, unspecified                                            | 3.787                                                 |
| J03.9                           |                         | Acute tonsillitis, unspecified                                           | 3.578                                                 |
| J00                             |                         | Acute nasopharyngitis (common cold)                                      | 2.990                                                 |
| M54.3                           |                         | Sciatica                                                                 | 2.949                                                 |
| <b>Canary Islands</b>           |                         | M54.5                                                                    | Low back pain                                         |
|                                 | J11                     | Influenza, virus not identified                                          | 10.897                                                |
|                                 | K52.9                   | Noninfective gastroenteritis and colitis, unspecified                    | 9.554                                                 |
|                                 | J00                     | Acute nasopharyngitis (common cold)                                      | 7.704                                                 |
|                                 | J20.9                   | Acute bronchitis, unspecified                                            | 5.579                                                 |
|                                 | F06.4                   | Organic anxiety disorder                                                 | 5.330                                                 |
|                                 | M54.3                   | Sciatica                                                                 | 4.744                                                 |

|                          |       |                                                                                |        |
|--------------------------|-------|--------------------------------------------------------------------------------|--------|
|                          | M54.2 | Cervicalgia                                                                    | 4.147  |
| <b>Cantabria</b>         | K52.9 | Noninfective gastroenteritis and colitis, unspecified                          | 4.078  |
|                          | J11   | Influenza, virus not identified                                                | 2.811  |
|                          | M54.5 | Low back pain                                                                  | 2.440  |
|                          | R45   | Symptoms and signs involving emotional state                                   | 1.723  |
|                          | J02.9 | Acute pharyngitis, unspecified                                                 | 1.679  |
|                          | J06   | Acute upper respiratory infections of multiple and unspecified sites           |        |
|                          | M54.3 | Sciatica                                                                       | 1.522  |
|                          | M54.2 | Cervicalgia                                                                    | 1.433  |
| <b>Castile and Leon</b>  | K52   | Other noninfective gastroenteritis and colitis                                 | 1.042  |
|                          | M54.5 | Low back pain                                                                  | 13.570 |
|                          | J11   | Influenza, virus not identified                                                | 9.100  |
|                          | F41.9 | Anxiety disorder, unspecified                                                  | 5.606  |
|                          | M54.3 | Sciatica                                                                       | 5.524  |
|                          | J98.8 | Other specified respiratory disorders                                          | 4.259  |
|                          | J06.9 | Acute upper respiratory infection, unspecified                                 | 3.877  |
|                          | J00   | Acute nasopharyngitis (common cold)                                            | 3.184  |
| <b>Castile La Mancha</b> | M54.5 | Low back pain                                                                  | 9.639  |
|                          | K52.9 | Noninfective gastroenteritis and colitis, unspecified                          | 6.248  |
|                          | J00   | Acute nasopharyngitis (common cold)                                            | 4.891  |
|                          | J11   | Influenza, virus not identified                                                | 4.162  |
|                          | K52   | Other noninfective gastroenteritis and colitis                                 | 3.929  |
|                          | J03.9 | Acute tonsillitis, unspecified                                                 | 3.363  |
|                          | M54.2 | Cervicalgia                                                                    | 3.049  |
|                          | M54.3 | Sciatica                                                                       | 2.947  |
| <b>Catalonia</b>         | K52.9 | Noninfective gastroenteritis and colitis, unspecified                          | 11.871 |
|                          | J00   | Acute nasopharyngitis (common cold)                                            | 82.707 |
|                          | M54.5 | Low back pain                                                                  | 77.901 |
|                          | J11   | Influenza, virus not identified                                                | 62.867 |
|                          | F41.9 | Anxiety disorder, unspecified                                                  | 55.710 |
|                          | B97.8 | Other viral agents as the cause of diseases classified to other chapters       | 41.739 |
|                          | J03.9 | Acute tonsillitis, unspecified                                                 | 33.821 |
|                          | M54.2 | Cervicalgia                                                                    | 26.867 |
| <b>Extremadura</b>       | M54.5 | Low back pain                                                                  | 3.009  |
|                          | J11   | Influenza, virus not identified                                                | 1.940  |
|                          | S93   | Dislocation, sprain and strain of joints and ligaments at ankle and foot level | 1.105  |
|                          | M54.2 | Cervicalgia                                                                    | 894    |
|                          | M54.3 | Sciatica                                                                       | 804    |
|                          | F41   | Other anxiety disorders                                                        | 723    |
|                          | M54.9 | Dorsalgia, unspecified                                                         | 688    |

|                                       |       |                                                                                |        |
|---------------------------------------|-------|--------------------------------------------------------------------------------|--------|
|                                       | M75   | Shoulder lesions                                                               | 560    |
| <b>Galicia</b>                        | M54.5 | Low back pain                                                                  | 13.555 |
|                                       | J11   | Influenza, virus not identified                                                | 10.794 |
|                                       | M54.2 | Cervicalgia                                                                    | 5.343  |
|                                       | F41   | Other anxiety disorders                                                        | 5.053  |
|                                       | J20.9 | Acute bronchitis, unspecified                                                  | 4.800  |
|                                       | M54.3 | Sciatica                                                                       | 3.402  |
|                                       | J03.9 | Acute tonsillitis, unspecified                                                 | 3.169  |
|                                       | S93   | Dislocation, sprain and strain of joints and ligaments at ankle and foot level | 2.705  |
| <b>Community of Madrid</b>            | K52.9 | Noninfective gastroenteritis and colitis, unspecified                          | 56.245 |
|                                       | M54.5 | Low back pain                                                                  | 33.522 |
|                                       | F41   | Other anxiety disorders                                                        | 28.118 |
|                                       | J02.9 | Acute pharyngitis, unspecified                                                 | 25.029 |
|                                       | J11   | Influenza, virus not identified                                                | 19.656 |
|                                       | M25   | Other joint disorders, not elsewhere classified                                | 17.815 |
|                                       | M54.3 | Sciatica                                                                       | 16.627 |
|                                       | J06.9 | Acute upper respiratory infection, unspecified                                 | 15.924 |
| <b>Region of Murcia</b>               | K52.9 | Noninfective gastroenteritis and colitis, unspecified                          | 7.114  |
|                                       | J11   | Influenza, virus not identified                                                | 6.808  |
|                                       | M54.5 | Low back pain                                                                  | 6.657  |
|                                       | J02.9 | Acute pharyngitis, unspecified                                                 | 4.808  |
|                                       | M54.3 | Sciatica                                                                       | 4.037  |
|                                       | R45   | Symptoms and signs involving emotional state                                   | 3.637  |
|                                       | M54.2 | Cervicalgia                                                                    | 3.253  |
|                                       | J06.9 | Acute upper respiratory infection, unspecified                                 | 2.438  |
| <b>Chartered Community of Navarre</b> | K52.9 | Noninfective gastroenteritis and colitis, unspecified                          | 9.976  |
|                                       | J11   | Influenza, virus not identified                                                | 8.159  |
|                                       | M54.5 | Low back pain                                                                  | 6.098  |
|                                       | J06.9 | Acute upper respiratory infection, unspecified                                 | 5.264  |
|                                       | J00   | Acute nasopharyngitis (common cold)                                            | 4.080  |
|                                       | A08.5 | Other specified intestinal infections                                          | 3.165  |
|                                       | J20.9 | Acute bronchitis, unspecified                                                  | 3.082  |
|                                       | F41.9 | Anxiety disorder, unspecified                                                  | 2.873  |
| <b>La Rioja</b>                       | K52.9 | Noninfective gastroenteritis and colitis, unspecified                          | 3.216  |
|                                       | J00   | Acute nasopharyngitis (common cold)                                            | 2.073  |
|                                       | J11   | Influenza, virus not identified                                                | 1.661  |
|                                       | M54.5 | Low back pain                                                                  | 1.613  |
|                                       | M54.3 | Sciatica                                                                       | 823    |
|                                       | J06.9 | Acute upper respiratory infection,                                             | 576    |



|                       |       |                                                       |        |
|-----------------------|-------|-------------------------------------------------------|--------|
|                       |       | unspecified                                           |        |
|                       | M25.5 | Pain in joint                                         | 529    |
|                       | R45.0 | Nervousness                                           | 515    |
| <b>Valencia</b>       | M54.5 | Low back pain                                         | 22.410 |
|                       | J11   | Influenza, virus not identified                       | 18.243 |
|                       | F41.9 | Anxiety disorder, unspecified                         | 12.054 |
|                       | K52.9 | Noninfective gastroenteritis and colitis, unspecified | 11.770 |
|                       | J00   | Acute nasopharyngitis (common cold)                   | 9.739  |
|                       | M54.2 | Cervicalgia                                           | 8.411  |
|                       | M54.3 | Sciatica                                              | 7.227  |
|                       | J20.9 | Acute bronchitis, unspecified                         | 6.953  |
| <b>Basque Country</b> | M54.5 | Low back pain                                         | 2.038  |
|                       | M54.2 | Cervicalgia                                           | 1.986  |
|                       | J00   | Acute nasopharyngitis (common cold)                   | 948    |
|                       | K52.9 | Noninfective gastroenteritis and colitis, unspecified | 759    |
|                       | J11   | Influenza, virus not identified                       | 662    |
|                       | F43.2 | Adjustment disorders                                  | 638    |
|                       | F41.9 | Anxiety disorder, unspecified                         | 625    |
|                       | R10   | Abdominal and pelvic pain                             | 609    |

Table 5. Sickness absence situations by occupational activities (International Standard Industrial Classification of all Economic Activities, ISIC Rev-4)

| Autonomous Community     | Code   | Occupational Activities                                                             | SA spells/per year                       | SA spell (per 1000 affiliates/per month) |       |
|--------------------------|--------|-------------------------------------------------------------------------------------|------------------------------------------|------------------------------------------|-------|
| Andalusia                | 8411   | General public administration activities                                            | 61.457                                   | 30,84                                    |       |
|                          | 8610   | Hospital activities                                                                 | 40.544                                   | 20,30                                    |       |
|                          | 8121   | General cleaning of buildings                                                       | 23.802                                   | 18,89                                    |       |
|                          | 5610   | Restaurants and mobile food service activities                                      | 23.377                                   | 28,5                                     |       |
|                          | 5630   | Beverage serving activities                                                         | 20.659                                   | 10,74                                    |       |
|                          | 4100   | Construction of buildings                                                           | 16.608                                   | 10,22                                    |       |
|                          | 4711   | Retail sale in non-specialized stores with food, beverages or tobacco predominating | 16.253                                   | 9                                        |       |
|                          | 5510   | Hotels and similar accommodation                                                    | 16.061                                   | 20,05                                    |       |
|                          | 4630   | Wholesale of food, beverage and tobacco                                             | 15.010                                   | 9,72                                     |       |
|                          | 8220   | Activities of call centres                                                          | 14.652                                   | 69,07                                    |       |
|                          | Aragon | 8411                                                                                | General public administration activities | 9.685                                    | 23,30 |
|                          |        | 8610                                                                                | Hospital activities                      | 8.022                                    | 16,61 |
|                          |        | 7820                                                                                | Temporary employment agency activities   | 7.550                                    | 73,50 |
| 2930                     |        | Manufacture of parts and accessories of motor vehicles                              | 5.874                                    | 11,70                                    |       |
| 8121                     |        | General cleaning of buildings                                                       | 5.464                                    | 21,78                                    |       |
| 4711                     |        | Retail sale in non-specialized stores with food, beverages or tobacco predominating | 3.773                                    | 5,3                                      |       |
| 5610                     |        | Restaurants and mobile food service activities                                      | 3.669                                    | 28,5                                     |       |
| 8220                     |        | Activities of call centres                                                          | 3.459                                    | 43                                       |       |
| 4923                     |        | Freight transport by road                                                           | 3.214                                    | 15,57                                    |       |
| 5630                     |        | Beverage serving activities                                                         | 3.073                                    | 10,95                                    |       |
| Principality of Asturias |        | 8610                                                                                | Hospital activities                      | 6.422                                    | 20,65 |
|                          | 4711   | Retail sale in non-specialized stores with food, beverages or tobacco predominating | 5.217                                    | 9,56                                     |       |
|                          | 8411   | General public administration activities                                            | 4.000                                    | 19,21                                    |       |
|                          | 5630   | Beverage serving activities                                                         | 2.560                                    | 10,46                                    |       |
|                          | 2410   | Manufacture of basic iron and steel                                                 | 2.330                                    | 12,08                                    |       |
|                          | 8121   | General cleaning of buildings                                                       | 2.285                                    | 13,6                                     |       |
|                          | 5610   | Restaurants and mobile food                                                         | 2.047                                    | 22,45                                    |       |

|                         |      |                                                                                     |        |       |
|-------------------------|------|-------------------------------------------------------------------------------------|--------|-------|
|                         |      | service activities                                                                  |        |       |
|                         | 8730 | Residential care activities for the elderly and disabled                            | 1.950  | 20,82 |
|                         | 8122 | Other building and industrial cleaning activities                                   | 1.651  | 18    |
|                         | 9700 | Activities of households as employers of domestic personnel                         | 1.365  | 8,51  |
| <b>Balearic Islands</b> | 5510 | Hotels and similar accommodation                                                    | 19.736 | 30,31 |
|                         | 5610 | Restaurants and mobile food service activities                                      | 9.399  | 13,6  |
|                         | 8610 | Hospital activities                                                                 | 8.059  | 26,49 |
|                         | 8411 | General public administration activities                                            | 6.141  | 27,19 |
|                         | 4100 | Construction of buildings                                                           | 6.129  | 13    |
|                         | 4711 | Retail sale in non-specialized stores with food, beverages or tobacco predominating | 5.078  | 8,44  |
|                         | 5630 | Beverage serving activities                                                         | 4.740  | 8,32  |
|                         | 8121 | General cleaning of buildings                                                       | 4.125  | 16,70 |
|                         | 5520 | Short term accommodation activities                                                 | 3.034  | 12,56 |
|                         | 4751 | Retail sale of textiles in specialized stores                                       | 2.408  | 21,6  |
| <b>Canary Islands</b>   | 5510 | Hotels and similar accommodation                                                    | 26.147 | 43,13 |
|                         | 8610 | Hospital activities                                                                 | 16.865 | 30,7  |
|                         | 8411 | General public administration activities                                            | 15.899 | 31,59 |
|                         | 5610 | Restaurants and mobile food service activities                                      | 11.628 | 18,32 |
|                         | 4711 | Retail sale in non-specialized stores with food, beverages or tobacco predominating | 10.495 | 7,9   |
|                         | 5520 | Short term accommodation activities                                                 | 7.221  | 32,30 |
|                         | 8121 | General cleaning of buildings                                                       | 7.000  | 18,7  |
|                         | 5630 | Beverage serving activities                                                         | 5.507  | 8,36  |
|                         | 4100 | Construction of buildings                                                           | 5.414  | 11,70 |
|                         | 8521 | General secondary education                                                         | 5.340  | 12,13 |
| <b>Cantabria</b>        | 8411 | General public administration activities                                            | 3.851  | 28,5  |
|                         | 7820 | Temporary employment agency activities                                              | 3.612  | 76,53 |
|                         | 8610 | Hospital activities                                                                 | 3.492  | 20,09 |
|                         | 8121 | General cleaning of buildings                                                       | 1.828  | 17,11 |
|                         | 5610 | Restaurants and mobile food service activities                                      | 1.616  | 22,5  |
|                         | 5630 | Beverage serving activities                                                         | 1.383  | 10,97 |

|                          |      |                                                                                     |        |       |
|--------------------------|------|-------------------------------------------------------------------------------------|--------|-------|
|                          | 8220 | Activities of call centres                                                          | 1.170  | 60    |
|                          | 8521 | General secondary education                                                         | 1.170  | 8,38  |
|                          | 4791 | Retail sale via mail order houses or via Internet                                   | 1.023  | 16,8  |
|                          | 8620 | Medical and dental practice activities                                              | 998    | 32    |
| <b>Castile and Leon</b>  | 8411 | General public administration activities                                            | 9.940  | 16,89 |
|                          | 8610 | Hospital activities                                                                 | 9.741  | 12,04 |
|                          | 8220 | Activities of call centres                                                          | 8.920  | 85,14 |
|                          | 8121 | General cleaning of buildings                                                       | 7.489  | 17,87 |
|                          | 4711 | Retail sale in non-specialized stores with food, beverages or tobacco predominating | 5.953  | 7,94  |
|                          | 8790 | Other residential care activities                                                   | 5.089  | 21,95 |
|                          | 5630 | Beverage serving activities                                                         | 5.023  | 14,59 |
|                          | 7820 | Temporary employment agency activities                                              | 4.676  | 45,75 |
|                          | 5610 | Restaurants and mobile food service activities                                      | 4.493  | 24,90 |
|                          | 2910 | Manufacture of motor vehicles                                                       | 4.409  | 10,35 |
| <b>Castile La Mancha</b> | 8411 | General public administration activities                                            | 15.003 | 22,17 |
|                          | 8610 | Hospital activities                                                                 | 7.820  | 14,89 |
|                          | 8121 | General cleaning of buildings                                                       | 5.363  | 19,98 |
|                          | 7820 | Temporary employment agency activities                                              | 5.272  | 56,70 |
|                          | 5210 | Warehousing and storage                                                             | 5.251  | 60    |
|                          | 4100 | Construction of buildings                                                           | 4.479  | 8,94  |
|                          | 4711 | Retail sale in non-specialized stores with food, beverages or tobacco predominating | 4.267  | 5,06  |
|                          | 5610 | Restaurants and mobile food service activities                                      | 4.092  | 32,54 |
|                          | 4923 | Freight transport by road                                                           | 3.846  | 14,08 |
|                          | 5630 | Beverage serving activities                                                         | 3.526  | 10,62 |
| <b>Catalonia</b>         | 8610 | Hospital activities                                                                 | 75.958 | 32,68 |
|                          | 8411 | General public administration activities                                            | 70.569 | 32,11 |
|                          | 5610 | Restaurants and mobile food service activities                                      | 45.084 | 47    |
|                          | 8121 | General cleaning of buildings                                                       | 44.117 | 22,8  |
|                          | 7820 | Temporary employment agency activities                                              | 43.109 | 73,56 |
|                          | 8220 | Activities of call centres                                                          | 37.877 | 74,91 |
|                          | 4711 | Retail sale in non-specialized stores with food, beverages or tobacco predominating | 30.528 | 12,95 |

|                            |      |                                                                                     |        |       |
|----------------------------|------|-------------------------------------------------------------------------------------|--------|-------|
|                            | 4751 | Retail sale of textiles in specialized stores                                       | 24.417 | 10,36 |
|                            | 8812 | Social work activities without accommodation for the elderly and disabled           | 20.007 | 43,56 |
|                            | 8423 | Public order and safety activities                                                  | 19.807 | 65    |
| <b>Extremadura</b>         | 8411 | General public administration activities                                            | 10.813 | 23,68 |
|                            | 8610 | Hospital activities                                                                 | 5.921  | 17,95 |
|                            | 8121 | General cleaning of buildings                                                       | 2.007  | 19,56 |
|                            | 8812 | Social work activities without accommodation for the elderly and disabled           | 1.643  | 18    |
|                            | 4100 | Construction of buildings                                                           | 1.610  | 7,48  |
|                            | 5630 | Beverage serving activities                                                         | 1.599  | 10,55 |
|                            | 4711 | Retail sale in non-specialized stores with food, beverages or tobacco predominating | 1.136  | 3,98  |
|                            | 5610 | Restaurants and mobile food service activities                                      | 1.044  | 13,64 |
|                            | 4923 | Freight transport by road                                                           | 914    | 12,89 |
|                            | 0150 | Mixed farming                                                                       | 902    | 8,79  |
| <b>Galicia</b>             | 8610 | Hospital activities                                                                 | 12.552 | 16,6  |
|                            | 8411 | General public administration activities                                            | 12.137 | 19,12 |
|                            | 4711 | Retail sale in non-specialized stores with food, beverages or tobacco predominating | 7.498  | 6,4   |
|                            | 5630 | Beverage serving activities                                                         | 6.532  | 12    |
|                            | 8121 | General cleaning of buildings                                                       | 5.775  |       |
|                            | 7820 | Temporary employment agency activities                                              | 5.270  | 40,61 |
|                            | 9700 | Activities of households as employers of domestic personnel                         | 4.830  | 11,45 |
|                            | 5610 | Restaurants and mobile food service activities                                      | 4.664  | 17,6  |
|                            | 8220 | Activities of call centres                                                          | 4.558  | 47,19 |
|                            | 4100 | Construction of buildings                                                           | 3.622  | 5,27  |
| <b>Community of Madrid</b> | 8610 | Hospital activities                                                                 | 44.482 | 17,65 |
|                            | 8121 | General cleaning of buildings                                                       | 42.703 | 20,63 |
|                            | 5610 | Restaurants and mobile food service activities                                      | 36.939 | 28,54 |
|                            | 4711 | General public administration activities                                            | 35.475 | 21,94 |
|                            | 8220 | Activities of call centres                                                          | 29.212 | 67,3  |
|                            | 4711 | Retail sale in non-specialized stores with food, beverages or tobacco predominating | 28.014 | 7,57  |

|                                       |      |                                                                                     |        |       |
|---------------------------------------|------|-------------------------------------------------------------------------------------|--------|-------|
|                                       | 9700 | Activities of households as employers of domestic personnel                         | 21.385 | 20,93 |
|                                       | 8299 | Other business support service activities n.e.c                                     | 20.351 | 13    |
|                                       | 5630 | Beverage serving activities                                                         | 17.608 | 12,05 |
|                                       | 4751 | Retail sale of textiles in specialized stores                                       | 15.735 | 15,31 |
| <b>Region of Murcia</b>               | 8620 | Medical and dental practice activities                                              | 11.008 | 34,8  |
|                                       | 0113 | Growing of vegetables and melons, roots and tubers                                  | 7.233  | 28,29 |
|                                       | 7820 | Temporary employment agency activities                                              | 6.037  | 23,35 |
|                                       | 4711 | General public administration activities                                            | 6.003  | 24,41 |
|                                       | 8121 | General cleaning of buildings                                                       | 4.915  | 25,01 |
|                                       | 5610 | Restaurants and mobile food service activities                                      | 3.672  | 34,02 |
|                                       | 5630 | Beverage serving activities                                                         | 3.635  | 21,63 |
|                                       | 4630 | Wholesale of food, beverage and tobacco                                             | 3.514  | 13,62 |
|                                       | 4711 | Retail sale in non-specialized stores with food, beverages or tobacco predominating | 3.228  | 8,96  |
|                                       | 4923 | Freight transport by road                                                           | 2.914  | 14,28 |
| <b>Chartered Community of Navarre</b> | 8610 | Hospital activities                                                                 | 14.408 | 46,16 |
|                                       | 8411 | General public administration activities                                            | 7.408  | 57,01 |
|                                       | 2930 | Manufacture of parts and accessories of motor vehicles                              | 5.782  | 18,2  |
|                                       | 7820 | Temporary employment agency activities                                              | 5.558  | 94,19 |
|                                       | 8521 | General secondary education                                                         | 3.909  | 19,86 |
|                                       | 8121 | General cleaning of buildings                                                       | 3.520  | 31,17 |
|                                       | 1030 | Processing and preserving of fruit and vegetables                                   | 3.256  | 38,37 |
|                                       | 2910 | Manufacture of motor vehicles                                                       | 3.195  | 17,07 |
|                                       | 8812 | Social work activities without accommodation for the elderly and disabled           | 3.151  | 76,35 |
|                                       | 9700 | Activities of households as employers of domestic personnel                         | 2.382  | 23,71 |
| <b>La Rioja</b>                       | 8610 | Hospital activities                                                                 | 1.698  | 18,25 |
|                                       | 8611 | General public administration activities                                            | 1.612  | 22,76 |
|                                       | 1520 | Manufacture of footwear                                                             | 1.463  | 38,2  |

|                       |      |                                                                                     |        |       |
|-----------------------|------|-------------------------------------------------------------------------------------|--------|-------|
|                       | 8121 | General cleaning of buildings                                                       | 1.290  | 29,05 |
|                       | 1030 | Processing and preserving of fruit and vegetables                                   | 1.217  | 27,4  |
|                       | 7820 | Temporary employment agency activities                                              | 1.060  | 71,12 |
|                       | 2930 | Manufacture of parts and accessories of motor vehicles                              | 1.006  | 12,1  |
|                       | 5630 | Beverage serving activities                                                         | 973    | 14,3  |
|                       | 1102 | Manufacture of wines                                                                | 962    | 13,09 |
|                       | 0113 | Growing of vegetables and melons, roots and tubers                                  | 907    | 21,5  |
| <b>Valencia</b>       | 8610 | Hospital activities                                                                 | 24.063 | 21,57 |
|                       | 8611 | General public administration activities                                            | 23.311 | 24,51 |
|                       | 5610 | Restaurants and mobile food service activities                                      | 16.234 | 20,93 |
|                       | 8121 | General cleaning of buildings                                                       | 12.758 | 16,04 |
|                       | 4711 | Retail sale in non-specialized stores with food, beverages or tobacco predominating | 11.239 | 6,14  |
|                       | 4630 | Wholesale of food, beverage and tobacco                                             | 7.300  | 8,81  |
|                       | 5630 | Beverage serving activities                                                         | 8.732  | 6,49  |
|                       | 4923 | Freight transport by road                                                           | 7.300  | 11,49 |
|                       | 7820 | Temporary employment agency activities                                              | 7.126  | 29,24 |
|                       | 4100 | Construction of buildings                                                           | 6.663  | 6,21  |
| <b>Basque Country</b> | 8610 | Hospital activities                                                                 | 22.704 | 30,48 |
|                       | 8611 | General public administration activities                                            | 15.565 | 27,16 |
|                       | 8121 | General cleaning of buildings                                                       | 13.043 | 29,20 |
|                       | 8521 | General secondary education                                                         | 12.519 | 14,51 |
|                       | 8812 | Social work activities without accommodation for the elderly and disabled           | 8.760  | 14,75 |
|                       | 5610 | Restaurants and mobile food service activities                                      | 8.419  | 29,01 |
|                       | 4711 | Retail sale in non-specialized stores with food, beverages or tobacco predominating | 6.625  | 6,6   |
|                       | 9700 | Activities of households as employers of domestic personnel                         | 6.284  | 18,55 |
|                       | 2591 | Forging, pressing, stamping and roll-forming of metal; powder metallurgy            | 6.086  | 10,29 |
|                       | 5630 | Beverage serving activities                                                         | 5.842  | 18,02 |

STROBE Statement—Checklist of items that should be included in reports of *cohort studies*

|                              | Item No | Recommendation                                                                                                                                                                                                                                                                                                         | Page No               |
|------------------------------|---------|------------------------------------------------------------------------------------------------------------------------------------------------------------------------------------------------------------------------------------------------------------------------------------------------------------------------|-----------------------|
| <b>Title and abstract</b>    | 1       | (a) Indicate the study's design with a commonly used term in the title or the abstract<br>(b) Provide in the abstract an informative and balanced summary of what was done and what was found                                                                                                                          | 1<br>1                |
| <b>Introduction</b>          |         |                                                                                                                                                                                                                                                                                                                        |                       |
| Background/rationale         | 2       | Explain the scientific background and rationale for the investigation being reported                                                                                                                                                                                                                                   | 3                     |
| Objectives                   | 3       | State specific objectives, including any prespecified hypotheses                                                                                                                                                                                                                                                       | 4                     |
| <b>Methods</b>               |         |                                                                                                                                                                                                                                                                                                                        |                       |
| Study design                 | 4       | Present key elements of study design early in the paper                                                                                                                                                                                                                                                                | 4                     |
| Setting                      | 5       | Describe the setting, locations, and relevant dates, including periods of recruitment, exposure, follow-up, and data collection                                                                                                                                                                                        | 4                     |
| Participants                 | 6       | (a) Give the eligibility criteria, and the sources and methods of selection of participants. Describe methods of follow-up<br>(b) For matched studies, give matching criteria and number of exposed and unexposed                                                                                                      | 4                     |
| Variables                    | 7       | Clearly define all outcomes, exposures, predictors, potential confounders, and effect modifiers. Give diagnostic criteria, if applicable                                                                                                                                                                               | 5                     |
| Data sources/<br>measurement | 8*      | For each variable of interest, give sources of data and details of methods of assessment (measurement). Describe comparability of assessment methods if there is more than one group                                                                                                                                   | 5                     |
| Bias                         | 9       | Describe any efforts to address potential sources of bias                                                                                                                                                                                                                                                              | 5                     |
| Study size                   | 10      | Explain how the study size was arrived at                                                                                                                                                                                                                                                                              | 5                     |
| Quantitative variables       | 11      | Explain how quantitative variables were handled in the analyses. If applicable, describe which groupings were chosen and why                                                                                                                                                                                           | 5                     |
| Statistical methods          | 12      | (a) Describe all statistical methods, including those used to control for confounding<br>(b) Describe any methods used to examine subgroups and interactions<br>(c) Explain how missing data were addressed<br>(d) If applicable, explain how loss to follow-up was addressed<br>(e) Describe any sensitivity analyses | 5<br>5<br>5<br>5<br>5 |
| <b>Results</b>               |         |                                                                                                                                                                                                                                                                                                                        |                       |
| Participants                 | 13*     | (a) Report numbers of individuals at each stage of study—eg numbers potentially eligible, examined for eligibility, confirmed eligible, included in the study, completing follow-up, and analysed<br>(b) Give reasons for non-participation at each stage<br>(c) Consider use of a flow diagram                        | 5<br>5<br>-           |
| Descriptive data             | 14*     | (a) Give characteristics of study participants (eg demographic, clinical, social) and information on exposures and potential confounders<br>(b) Indicate number of participants with missing data for each variable of interest<br>(c) Summarise follow-up time (eg, average and total amount)                         | 5<br>5<br>5           |
| Outcome data                 | 15*     | Report numbers of outcome events or summary measures over time                                                                                                                                                                                                                                                         | 6                     |



|    |                          |                                                                                                                  |                                                                                                                                                                                                              |     |
|----|--------------------------|------------------------------------------------------------------------------------------------------------------|--------------------------------------------------------------------------------------------------------------------------------------------------------------------------------------------------------------|-----|
| 1  | Main results             | 16                                                                                                               | (a) Give unadjusted estimates and, if applicable, confounder-adjusted estimates and their precision (eg, 95% confidence interval). Make clear which confounders were adjusted for and why they were included | 6-7 |
| 2  |                          | (b) Report category boundaries when continuous variables were categorized                                        |                                                                                                                                                                                                              |     |
| 3  |                          | (c) If relevant, consider translating estimates of relative risk into absolute risk for a meaningful time period |                                                                                                                                                                                                              |     |
| 4  | Other analyses           | 17                                                                                                               | Report other analyses done—eg analyses of subgroups and interactions, and sensitivity analyses                                                                                                               | 6-7 |
| 5  | <b>Discussion</b>        |                                                                                                                  |                                                                                                                                                                                                              |     |
| 6  | Key results              | 18                                                                                                               | Summarise key results with reference to study objectives                                                                                                                                                     | 7   |
| 7  | Limitations              | 19                                                                                                               | Discuss limitations of the study, taking into account sources of potential bias or imprecision. Discuss both direction and magnitude of any potential bias                                                   | 2   |
| 8  | Interpretation           | 20                                                                                                               | Give a cautious overall interpretation of results considering objectives, limitations, multiplicity of analyses, results from similar studies, and other relevant evidence                                   | 8-9 |
| 9  | Generalisability         | 21                                                                                                               | Discuss the generalisability (external validity) of the study results                                                                                                                                        | 8-9 |
| 10 | <b>Other information</b> |                                                                                                                  |                                                                                                                                                                                                              |     |
| 11 | Funding                  | 22                                                                                                               | Give the source of funding and the role of the funders for the present study and, if applicable, for the original study on which the present article is based                                                | 10  |

\*Give information separately for exposed and unexposed groups.

**Note:** An Explanation and Elaboration article discusses each checklist item and gives methodological background and published examples of transparent reporting. The STROBE checklist is best used in conjunction with this article (freely available on the Web sites of PLoS Medicine at <http://www.plosmedicine.org/>, Annals of Internal Medicine at <http://www.annals.org/>, and Epidemiology at <http://www.epidem.com/>). Information on the STROBE Initiative is available at <http://www.strobe-statement.org>.

# BMJ Open

## DESCRIPTIVE STUDY OF SICKNESS ABSENCE IN SPAIN REGIONS IN 2018

|                                 |                                                                                                                                                                                                                                                                                                                                                                                                                                                                                                             |
|---------------------------------|-------------------------------------------------------------------------------------------------------------------------------------------------------------------------------------------------------------------------------------------------------------------------------------------------------------------------------------------------------------------------------------------------------------------------------------------------------------------------------------------------------------|
| Journal:                        | <i>BMJ Open</i>                                                                                                                                                                                                                                                                                                                                                                                                                                                                                             |
| Manuscript ID                   | bmjopen-2020-038239.R2                                                                                                                                                                                                                                                                                                                                                                                                                                                                                      |
| Article Type:                   | Original research                                                                                                                                                                                                                                                                                                                                                                                                                                                                                           |
| Date Submitted by the Author:   | 04-Jul-2020                                                                                                                                                                                                                                                                                                                                                                                                                                                                                                 |
| Complete List of Authors:       | Alba- Jurado, Matilde-Leonor; National Institute of Social Security, Medical Unit<br>Aguado, María-José; Chief Medical Inspector. , Director of Coordination of Medical Units. National Institute of Social Security.<br>Moreno-Morales, Noelia; University of Malaga Faculty of Health Sciences, Physiotherapy<br>Labajos-Manzanares, Maria Teresa; University of Malaga Faculty of Health Sciences, Physiotherapy<br>Martín-Valero, Rocío; University of Malaga Faculty of Health Sciences, Physiotherapy |
| <b>Primary Subject Heading</b>: | Occupational and environmental medicine                                                                                                                                                                                                                                                                                                                                                                                                                                                                     |
| Secondary Subject Heading:      | Public health                                                                                                                                                                                                                                                                                                                                                                                                                                                                                               |
| Keywords:                       | PREVENTIVE MEDICINE, PUBLIC HEALTH, OCCUPATIONAL & INDUSTRIAL MEDICINE                                                                                                                                                                                                                                                                                                                                                                                                                                      |
|                                 |                                                                                                                                                                                                                                                                                                                                                                                                                                                                                                             |

SCHOLARONE™  
Manuscripts



I, the Submitting Author has the right to grant and does grant on behalf of all authors of the Work (as defined in the below author licence), an exclusive licence and/or a non-exclusive licence for contributions from authors who are: i) UK Crown employees; ii) where BMJ has agreed a CC-BY licence shall apply, and/or iii) in accordance with the terms applicable for US Federal Government officers or employees acting as part of their official duties; on a worldwide, perpetual, irrevocable, royalty-free basis to BMJ Publishing Group Ltd ("BMJ") its licensees and where the relevant Journal is co-owned by BMJ to the co-owners of the Journal, to publish the Work in this journal and any other BMJ products and to exploit all rights, as set out in our [licence](#).

The Submitting Author accepts and understands that any supply made under these terms is made by BMJ to the Submitting Author unless you are acting as an employee on behalf of your employer or a postgraduate student of an affiliated institution which is paying any applicable article publishing charge ("APC") for Open Access articles. Where the Submitting Author wishes to make the Work available on an Open Access basis (and intends to pay the relevant APC), the terms of reuse of such Open Access shall be governed by a Creative Commons licence – details of these licences and which [Creative Commons](#) licence will apply to this Work are set out in our licence referred to above.

Other than as permitted in any relevant BMJ Author's Self Archiving Policies, I confirm this Work has not been accepted for publication elsewhere, is not being considered for publication elsewhere and does not duplicate material already published. I confirm all authors consent to publication of this Work and authorise the granting of this licence.

1  
2  
3 **1 TITLE PAGE**

4  
5 **2 TITLE:**

6  
7 **3 DESCRIPTIVE STUDY OF SICKNESS ABSENCE IN SPAIN REGIONS IN 2018**

8  
9 **4 AUTHORS:** Matilde-Leonor Alba-Jurado<sup>1</sup>, María-José Aguado-Benedí<sup>2</sup>, Noelia

10  
11 Moreno-Morales<sup>3</sup>, María-Teresa Labajos-Manzanares<sup>3</sup>, Rocío Martín-Valero<sup>3\*</sup>

12  
13  
14 **\*CORRESPONDENCE AUTHOR:** [rovalemas@gmail.com](mailto:rovalemas@gmail.com)

15  
16 <sup>1</sup>Medical Inspector. Medical Unit. National Institute of Social Security. Kandinsky 12

17  
18 Bajo, 2010 Málaga, Spain. Email: [matilde-leonor.alba@seg-social.es](mailto:matilde-leonor.alba@seg-social.es)

19  
20  
21 <sup>2</sup>Chief Medical Inspector. General Deputy Director of Coordination of Medical Units.

22  
23 National Institute of Social Security. Padre Damian 4-6, 6º, 28036, Madrid, Spain.

24  
25 Associate professor of Department of Legal Medicine, Pathology, and Psychiatry.

26  
27 Complutense University of Madrid. Spain.

28  
29  
30 <sup>3</sup>University Professor of Department of Physiotherapy, Faculty of Health Sciences,

31  
32 University of Malaga, Arquitecto Francisco Peñalosa 3, Ampliación de Campus de

33  
34 Teatinos, 29071 Malaga, Spain

35  
36  
37 **16 WORD COUNT:** 3529 words

38  
39  
40 **17 39 References**

41  
42  
43 **18 5 Tables**

44  
45  
46 **19 KEYWORDS:** PREVENTIVE MEDICINE, PUBLIC HEALTH, SICK LEAVE,

47  
48  
49 OCCUPATIONAL HEALTH, OCCUPATIONAL ACCIDENT

50  
51  
52 **21 Orcid ids:** Matilde-Leonor Alba-Jurado <https://orcid.org/0000-0002-3640-1047>

53  
54  
55 Noelia Moreno Morales <https://orcid.org/0000-0001-5907-9735>

56  
57 María Teresa Labajos Manzanares <https://orcid.org/0000-0002-3911-4406>

58  
59 Rocío Martín-Valero <http://orcid.org/0000-0002-1664-3647>

60  
25 María José Aguado Benedí <https://orcid.org/0000-0002-3049-166X>

1  
2  
3  
4  
5  
6  
7  
8  
9  
10  
11  
12  
13  
14  
15  
16  
17  
18  
19  
20  
21  
22  
23  
24  
25  
26  
27  
28  
29  
30  
31  
32  
33  
34  
35  
36  
37  
38  
39  
40  
41  
42  
43  
44  
45  
46  
47  
48  
49  
50  
51  
52  
53  
54  
55  
56  
57  
58  
59  
60**TITLE:**

1 DESCRIPTIVE STUDY OF SICKNESS ABSENCE IN SPAIN REGIONS IN 2018

**ABSTRACT**

**Objectives:** To provide a wide and thorough description of sickness absence (SA) in Spain, focusing on the different regions of the country and the main characteristics.

**Methods:** A study of the SA spells in Spain, managed by the medical units of the National Institute of Social Security in 2018. The geographical scope of this observational study is the Autonomous Community. Incidence, prevalence, and average duration in employees and self-employed are described. The study also describes the differences between non-work-related SA and work-related SA. In age and sex variables, we describe the incidence and the average duration. We have analysed the average duration by Diagnostic Chapters (ICD-10) and the highest number of SA spells by occupational activity and diagnosis.

**Results:** We analyse a total of 540,045 SA spells by non-work-related SA and 63,441 by work-related SA. The national average prevalence in non-work-related SA spells was 32.98/1000 among employed and 30.48/1000 among self-employed; in work-related SA spells it was 3.99/1000. The national incidence in non-work-related SA spells was 24.8/1000 for employees and 9.51/1000 for self-employed workers; in work-related SA spells it was 3.55/1000. The average duration is 58.67 days, with the longest duration being neoplasms and the shortest corresponds to infectious disease. The Community of Madrid shows the lowest prevalence, incidence, and average duration in work-related SA. "Influenza" was the diagnosis that generates the largest number of SA spells. "Activities of call centres" and "Temporary employment agency activities" were the ones they had the highest number of SA spells.

**Conclusions:** The biggest differences we find in the incidence, average duration, and between the non-work-related SA spells and work-related SA. If we know those characteristics of the SA in which a region is more in deficit, we will be able to do better management of the SA.

## STRENGTHS AND LIMITATIONS OF THIS STUDY

- The greatest strength of this study is the broad representativeness of its data.
- The data used are at a national level, which allows a great perspective of SA in Spain.
- This study has not always been possible to compare the data between employed and self-employed workers.
- It has not always been possible to distinguish in this study between non-work-related and work-related in all SA spells
- In this study we have not been able to analyze the factors involved in the SA in Spain

## INTRODUCTION

1  
2  
3  
4  
5  
6  
7  
8  
9  
10  
11  
12  
13  
14  
15  
16  
17  
18  
19  
20  
21  
22  
23  
24  
25  
26  
27  
28  
29  
30  
31  
32  
33  
34  
35  
36  
37  
38  
39  
40  
41  
42  
43  
44  
45  
46  
47  
48  
49  
50  
51  
52  
53  
54  
55  
56  
57  
58  
59  
60

Sickness absence (SA) is one of the benefits of Social Security, included in article 169 of the Consolidated Text of the General Law of Social Security, RDL 8/2015 of October 30<sup>th</sup>. It comprises benefits in kind (medical assistance) and monetary compensations (benefits for SA). In Spain, we distinguish between non-work-related sickness absence (common disease and non-occupational accident) and work-related sickness absence (professional illness and occupational accident). The differences between one group and the other can be seen both in the economic amount of the benefits due to sick leave and in the social security contributions. To be entitled to this subsidy, there must be the medical examination and SA is certified by the family practitioner from the State Health Services, in case of common disease and non-occupational accident. If it is caused by occupational accidents or professional illness, this sick leave is certified by physicians ascribed to Insurance Companies linked to the Social Security system. Maximum duration of sick leave is 365 days, which can be extended for another 180 days if recovery and return of the worker to workplace are expected at that time. If the duration of sickness benefits has expired and the person's state of health has not improved enough to return to work, the worker may receive a disability pension. The maximum duration of SA benefits is similar to other countries nearby such as Germany, Belgium, or Austria. However, there are considerable differences in all EU countries in terms of the amount of the payment and the requirements for receiving these benefits<sup>1</sup>.

Concerning the rest of the countries of the Organisation for Economic Co-operation and Development (OECD), Spain is in an intermediate position regarding the SA days per worker/year. Mexico is in the highest position with 27.7 days, whereas Chile, in the lowest position, has 7.3 days. Spain has an average of 10.3 days, which is similar to the level of Austria and the Netherlands (10 days) (<https://stats.oecd.org/index.aspx?queryid=30123>)

Like most European countries, Spain's public sickness insurance spending is a major component of its social security system<sup>1</sup>. The total financial cost of SA in consolidated Social Security budgets for 2019 in Spain reached 11,554,711.16 euros, which is 8.89% of the general Social Security budget<sup>2</sup>. Besides, the importance of SA caused by disease or accident is not only determined by the social and financial costs that each State dedicates to it<sup>3</sup>, but also by the resources that employers assign to it<sup>4</sup>, as well as the productivity losses<sup>5</sup> and the deterioration of these workers' health<sup>6</sup>. It has been reported that work absenteeism due to illness is, in itself, a risk factor to fall sick, new periods of SA, unemployment, permanent disability pension<sup>6-8</sup>, social exclusion<sup>9</sup> and death<sup>10,11,12</sup>. Long SA periods generate both an early retirement from the job market, a slower salary increase, and an impoverishment of household wealth<sup>6,7-9</sup>.

Spain is divided into 17 regions (Autonomous Communities). In each region there are significant differences in education, economic situation, unemployment rate, and public health system. By sex, the percentage of men and women is balanced. The number of women is slightly higher, although the number of working men is still higher. By age, the regions with the youngest population are mainly those on the Mediterranean coast and also Castile la Mancha, Extremadura, and the Community of Madrid. The northwestern regions are more aged.

1  
2  
3 1 In 2017 the working population rate in Spain was 59.41%. The regions with the highest  
4 2 rates of active population were the Canary Islands, the Balearic Islands, the Community  
5 3 of Madrid and Catalonia, and those with the lowest rates were the Cantabrian, Western  
6 4 and Central regions. Service sector was the majority of the workforce (76%) in the  
7 5 islands, the Community of Madrid and Andalusia. Industry was the predominant sector  
8 6 in Navarre, the Basque Country and La Rioja; construction in Castile La Mancha; and  
9 7 agriculture and farming in Murcia (<http://uvadoc.uva.es/handle/10324/26416>)

12 8 These factors affect the behaviour of SAs and their management in very different ways.  
13 9 It is important to know the differences to act according.

15 10 Despite its relevance to public policies, there are few studies at the national level that  
16 11 describe the current situation of such benefits in our country; to date, the studies found  
17 12 in the literature related to this topic describe it partially<sup>13</sup>, in some provinces or specific  
18 13 areas<sup>14</sup>, about some specific diseases<sup>15</sup> or specific groups of workers<sup>16</sup>. The data we use  
19 14 are national, representing the whole of the workers in Spain. It is a comprehensive and  
20 15 representative study of the total of SA spells in our country, in 2018.

23 16 The general objective of this study is to provide a wide description of SA in Spain,  
24 17 focusing on the different regions of the country and according to the main  
25 18 characteristics and differences.

27 19 The specific objectives would be the description of the incidence, prevalence, and  
28 20 average duration of SA. Describe the average duration and incidence rate about age and  
29 21 sex, as well as the average duration of SA by Diagnostic Chapters following the ICD-  
30 22 10. The main occupational activities in which there are more workers with SA spells  
31 23 and the main diseases that cause more SA spells.

## 34 24 **MATERIAL AND METHODS**

35 25 This study was carried out using the statistical databases provided by the Spanish Institute of  
36 26 Social Security (INSS), which are published on the website of this organisation ([www.seg-social.es/wps/portal/wss/internet/EstadisticasPresupuestosEstudios/](http://www.seg-social.es/wps/portal/wss/internet/EstadisticasPresupuestosEstudios/)), and databases obtained  
37 27 from specific programs used by the Medical Units.  
38 28

39 29 The reference population was formed by all the workers in Spain covered by the Social Security  
40 30 system in the year 2018. The study excluded the SA cases of civil workers, Armed Forces  
41 31 personnel, and workers of the General Judicial Benefit Society, whose control and management  
42 32 were not an object of study. SA spells with a duration of fewer than 4 days are not included,  
43 33 because they do not obtain economic benefits from the Social Security system in Spain. Our  
44 34 study does not include unemployed workers, because they do not receive SA benefits

46 35 In Spain, our system of social security is contributory. To this end, both the worker and  
47 36 the company contribute to the system every month a sum of money (contribution) so  
48 37 that the worker can obtain benefits in case of illness or accident. If the worker is self-  
49 38 employed, it is himself who makes these economic contributions exclusively for non-  
50 39 work-related SA. This self-employed person also can pay voluntarily an extra amount  
51 40 for work-related SA to obtain benefits if he or she has a professional illness or an  
52 41 occupational accident.



1  
2  
3 1 Our database doesn't distinguish between employed and self-employed workers in the  
4 2 case of work-related SA. However, in non-work-related SA such division is made  
5 3 (Table 1)

6  
7 4 Sample: we used the 2018 total SA records of the Spanish National Institute of Social Security  
8 5 (INSS), which coincide with the total population studied.

9  
10 6 The variables used were: age (in ranges), sex, average SA duration, diagnosis and diagnostic  
11 7 group (International Classification of Diseases, ICD-10), employee or self-employed, non-  
12 8 work-related SA (common disease non-occupational accident) or work-related SA (occupational  
13 9 accident and professional illness), and occupations with higher SA ranking according to the  
14 10 International Standard Industrial Classification of all Economic Activities (ISIC Rev-4).

15  
16  
17 11 The geographical scope of the study was the Autonomous Community.

18  
19 12 This is an observational study. The statistical calculations used to refer to all the people  
20 13 affiliated with the system, who were entitled to receive the SA benefit (AFI), calculated  
21 14 according to the data provided by the Public Employment Service, the General Treasury of  
22 15 Social Security, INSS and the Social Institute of the Navy.

23  
24 16 Incidence: the ratio that calculates the number of SA (MP2R) per 1000 affiliates. To compute  
25 17 the SA, we used the number of real registrations for the benefit (MP2R). Monthly datum:  
26 18  $MP2R * 1000 / AFI$ . Accumulated datum: average (MP2R) \* 1000 / AFI

27  
28 19 Prevalence: the ratio that calculates the number of SA processes in force per 1000 affiliates. To  
29 20 compute the processes in force, we used the number of perceivers at the end of the period  
30 21 (MP4). Monthly datum:  $MP4 * 1000 / AFI$ . Accumulated datum: average (MP4) \* 1000 / AFI

31  
32 22 The mean general duration is the average of all durations per year. The mean duration per age  
33 23 range and sex were calculated by dividing the number of days in SA by the number of workers  
34 24 in SA in that range. We also described the number of workers in SA per 1000 affiliates. We  
35 25 calculated the median for the average duration per diagnostic chapter, using the statistics  
36 26 software Excel®.

## 37 27 **Patient and public involvement**

38  
39 28 Anonymised patient data were used in this study. Patients and members of the public were not  
40 29 involved in the conducting of the study.

## 41 30 **RESULTS**

42  
43  
44 31 We analyze a total of 540,045 non-work-related SA spells and 63,441 work-related SA spells,  
45 32 which were those controlled by the Medical Units of the Spanish National Institute of Social  
46 33 Security. There was a total of 16,373,239 workers affiliated to social security.

47  
48  
49 34 The age of the study participants was 16 to 70 years old, both men and women. All are included  
50 35 in all the variables studied (non-work-related, work-related, employed, self-employed, sex, age,  
51 36 diagnosis, and occupational activities). Follow-up time was one year (2018).

52  
53 37 Our results were:

### 54 38 ***SA Prevalence***

55  
56  
57 39 The prevalence of non-work-related SA was is 32,68/1000, among employed and 30,48/1000  
58 40 among self-employed. Prevalence of work-related was 3,99/1000. In the non-work-related, it  
59 41 ranges between 27,3 in La Rioja and 40,45 in the Canary Islands in employed persons. In self-

employed, it ranges between 21,5 in the Balearic Islands and 40,63 in the Region of Murcia. In work-related SA, it ranges from 2.73 in the Community of Madrid to 5.51 in Galicia (Table 1).

### ***SA incidence***

Incidence of non-work-related was is 24.87/1000 among employed and 9.51/1000 among self-employed. The incidence of work-related was 3.55/1000. Its values range between 12.76 in Extremadura and 36.7 in Catalonia (non-work-related, employed person); for self-employed it ranges between 7.71 in Community of Madrid and 16.46 in Chartered Community of Navarre (non-work-related SA). In work-related SA, it ranges from 2.89 in Madrid to 5.15 in the Balearic Islands (Table 1).

### ***Average SA duration***

The average duration is was 58.67 days (in non-work-related SA from 38.81 days among employed to 91.38 days among self-employed) with a median of 48.53 days. In non-work-related SA for employees, it ranges between 24.64 days in Chartered Community of Navarre to 67.53 in Extremadura. For self-employed, it varies between 55.15 days in Navarra to 112.86 days in Extremadura. In work-related SA, it ranges from 30.94 days in the Balearic Islands to 50.14 in Cantabria (Table 1).

### ***SA spells and average duration (age ranges and sex).***

In table 2 the total number of workers on sick leave by age and sex was analyzed. We distinguish between the absolute number of workers on SA and the number of workers on SA per 1000 affiliated per age group and gender because in Spain, in almost all age groups there are more men than women affiliated to social security. This may result in more absolute numbers of sickness absence for men, although the number of SA is higher for women according to the number of affiliates.

Therefore, the total number of workers in SA by age and sex is higher in men than in women (Table 2). According to age range and sex, the number of affiliates in SA is higher in women, except in Castilla-León, Chartered Community of Navarre and the Basque Country between 16 and 25 years of age, Principality of Asturias and La Rioja between 26 and 35 years and La Rioja in 36-45 and 46-55 years.

The average duration is also higher in women than in men in all the age ranges, except in the Community of Madrid and La Rioja for 16-25 years, and Principality of Asturias, Balearic Islands, Canary Islands, Catalonia and Chartered Community of Navarre in workers over 65 years of age.

In women, the average duration is 58.5 days (minimum 12, maximum 137), with a median of 52 days. In men, the average is 53.08 days (minimum 13, maximum 118), with a median of 44.

### ***Average SA duration (diagnostic chapter)***

The average SA duration, in general, is 56.82 days, with a median of 52.80 days. In all the Autonomous Communities, the longest duration corresponds to neoplasms, followed by heart diseases and mental disorders. The shortest duration corresponds to infectious diseases (Table 3).

### ***SA spells by International Classification Diseases 10 (ICD-10) diagnosis***

Table 4 describes the main diagnoses that generate the highest numbers of SA spells/1000 affiliates/per month. The diagnoses with the highest number of SA were: "Influenza, virus not identified", "Lower back pain" and "Noninfective gastroenteritis and colitis, unspecified".

1  
2  
3 1 They highlighted the multiple SA spells per diagnosis “Noninfective gastroenteritis and colitis,  
4 2 unspecified” on Catalonia, Balearic Islands and Community of Navarre.

5  
6 3 **SA spells by International Standard Industrial Classification of all Economic Activities**  
7 4 **(ISIC Rev-4)**

8  
9 5 There is an outstanding number of SA spell in “General public administration activities”,  
10 6 “Hospital activities”, “Retail sale in non-specialized stores with food, beverages or tobacco  
11 7 predominating” and “General cleaning of buildings” (Table 5).

12  
13 8 However, when we analyze these cases by the number of affiliates in each occupational  
14 9 activities, those occupations in which we find the most SA spells are "Activities of call centres",  
15 10 "Temporary employment agency activities" and "General public administration activities"

16  
17 11 **DISCUSSION**

18  
19 12 The obtained results confirm many of the findings described by other authors at both the  
20 13 national<sup>17</sup> and international levels<sup>18</sup>.

21  
22 14 The prevalence and incidence were much higher in non-work-related SA than in work-  
23 15 related SA, which was logical, since work-related SA only included the accidents  
24 16 occurred in the workplace, as well as the professional diseases described in the Royal  
25 17 Decree 1299/2006 of November 10th, and not all diseases, accidents, and injuries that  
26 18 any worker can suffer.

27  
28 19 When we analysed the SA prevalence in each Region, we observed that there were few  
29 20 Regions as Aragon and the Community of Madrid below the national average. By  
30 21 breaking down into non-work-related SA, the regions that were below the average were  
31 22 Andalusia, Aragon, the Balearic Island, Community of Madrid, La Rioja and Valencian  
32 23 Community, while in work-related SA, Aragon, Catalonia, the Basque Country, the  
33 24 Canary Islands and Community of Madrid stood out below the average. It is difficult to  
34 25 know the reasons for these differences. To analyse the possible causes of these  
35 26 differences, it would be necessary to carry out other sorts of studies.

36  
37 27 There were also important differences concerning incidence, with these differences  
38 28 being very marked in some regions. Only Castile and Leon did not reach the national  
39 29 average. In the case of non-work-related SA, Andalusia, Castile, and Leon, Extremadura  
40 30 and Valencian Community were below the national average. In work-related SA, values  
41 31 were very approximate in all regions. The highest value was in the Balearic Islands.

42  
43 32 There was a significant difference in the incidence of SA between the employed and  
44 33 self-employed which was much higher in the former. This was in line with the results  
45 34 obtained in other studies conducted in Spain<sup>4</sup> and at an international level<sup>7,19,20</sup>.

46  
47 35 The average duration was shorter in all regions in the case of work-related SA because  
48 36 these SA were managed directly by associated Insurance Companies, whose network of  
49 37 doctors and hospital beds were exclusively for workers who had suffered occupational  
50 38 accidents or professional illness. In the case of non-work-related SA, health care was  
51 39 provided by the Public Health System, where other patients were also treated (children,  
52 40 elderly, non-working patients, etc.), so waiting lists were longer and treatments for these  
53 41 patients could be delayed further. Besides, the longest duration was for oncological  
54 42 diseases and mental disorders, the origin of which is usually unrelated to work. This

1 finding was in line with that of other studies at the national<sup>4</sup> and European<sup>19</sup> level. Non-  
2 work-related SA showed a longer duration to work-related SA which has remained like  
3 this for years<sup>14</sup>. The region that showed the shortest duration as a whole was Navarre,  
4 where the health expenditure per inhabitant was also the highest in Spain. Healthcare  
5 expenditure was also higher in the Basque Country, however, the duration of the IT was  
6 one of the longest in many diagnostic chapters.

7 We would like to emphasize that the most noteworthy fact was that the number of days  
8 on SA for self-employed workers was double that employees in all of Spain's regions.  
9 In our experience, this could be caused by the fact that self-employed workers do not  
10 usually start a process of short-term SA, because cash benefits for SA are paid 30 days  
11 after the start of SA and they do not receive cash benefits in short-term SA

12 The incidence, prevalence, and average duration increased with age. This occurred in all  
13 age ranges except for very young workers (men and women) and those over 65 years  
14 old. In young people, it could be explained by the fact that they often have low-skilled  
15 jobs (they haven't yet finished their education). They are often temporary and unstable  
16 jobs, and many young people work and study at the same time. This causes a double  
17 workload that could contribute to worsening their health. As we can see, they were  
18 short-term SA, which could indicate a low severity of the pathologies that produced  
19 them. In the over-65s the prevalence was very low, in all regions. One possible  
20 explanation is that the retirement age in Spain is around 65 and the worker who decides  
21 to continue working instead of retiring is in good health. However, the duration of these  
22 SA was very long, because at this age there was a greater prevalence of serious  
23 pathologies (neoplasms, ictus, etc.).

24 The differences observed in the number of employees regarding sex were in line with  
25 the patterns obtained in other studies, with higher incidence<sup>19</sup> and longer duration<sup>21</sup> in  
26 women. There was a sex breach in some European countries (Spain, Ireland, France,  
27 Belgium, and United Kingdom) compared to others (Netherlands, Portugal, and  
28 Italy)<sup>21,22</sup>. The incidence increased with age, which was in agreement with most studies  
29 at the national<sup>4,23</sup> and international<sup>7,18,21,22-24</sup> level, with higher intensity according to the  
30 number of affiliates per sex and age range (Table 2). Among the multiple explanations  
31 for this fact, it is worth highlighting the following: the double work women usually  
32 carry out, i.e., paid work and domestic work, with greater responsibilities for the family  
33 (traditional gender role)<sup>22,24</sup>, the different behavior of women toward disease<sup>22</sup>, their  
34 greater morbidity related to maternity<sup>25</sup> and more fragile health<sup>26</sup>, as well as their lower  
35 commitment to work<sup>22</sup>. Other authors highlight the occupational differences, which  
36 could explain more than half of the gender differences<sup>24</sup>, as well as the stress level<sup>24</sup>.  
37 However, this gender breach was not constant in the long term in all the European  
38 countries<sup>22,21</sup>; in fact, some studies question its existence based on the occupational  
39 level<sup>27</sup> and the stress level<sup>28</sup>.

40 The longest duration by diagnostic chapter was oncological diseases, cardiovascular  
41 diseases, and mental disorders, which was in line with other studies<sup>29-31</sup>. Moreover, this  
42 fact poses a serious problem of public health, given the accelerated increase of chronic  
43 diseases in all the countries around Spain<sup>32</sup>, with the consequent increase in the  
44 incidence and duration of SA and the cost that it implies<sup>4,29</sup>.

1  
2  
3 1 The diagnosis that generated the largest number of SA cases, after the flu, is “lower  
4 2 back pain”. This finding was in line with numerous studies, being, nationally, the main  
5 3 diagnosis of sick leave due to its high incidence and recurrence rate<sup>33</sup>, as well as to the  
6 4 duration<sup>23,34,35</sup> and economic costs of such SA<sup>35</sup>. This was due to the great prevalence of  
7 5 such pathology, regardless of whether or not it generates SA cases<sup>33,36</sup>, among other  
8 6 factors.

9  
10  
11 7 The Public Administration was in the 1<sup>st</sup>, 2<sup>nd</sup> and 3<sup>rd</sup> positions in the described ranking  
12 8 in almost all the Autonomous Communities. This could be explained by the difference  
13 9 between workers of the public sector, who represent a greater number of SA cases than  
14 10 employees in the private sector, as in other countries<sup>19,37,38</sup>. However, in previous  
15 11 studies carried out in Spain, the Public Administration did not represent or occupied  
16 12 such an important place in SA spells, being greatly surpassed by the industrial and  
17 13 construction sectors<sup>16,39</sup>.

18  
19 14 When we analysed the SA spells by the number of affiliated workers in each  
20 15 occupational activities, we found a higher number of them in workers in call centres and  
21 16 temporary employment agencies. These activities have a high level of job instability,  
22 17 with a high worker turnover and very short term contracts. This could explain the high  
23 18 rate of absence in them.

24  
25 19 One of the occupational activities with the highest number of SA spells was "Retail sale  
26 20 in non-specialized stores with food, beverages or tobacco predominating", but when it  
27 21 was analyzed by the number of affiliates, this number of SA spells was one of the  
28 22 lowest of all occupational activities. One possible explanation is that many of these  
29 23 workers were self-employed and, as mentioned before, in these workers the SA  
30 24 incidence was very low.

## 31 25 **Conclusion**

32 26 This study shows the important characteristics of SA in Spain. The most important  
33 27 differences are found in SA incidence and average duration between the different  
34 28 Autonomous Communities and non-work-related and work-related SA spells. There are  
35 29 also important differences in the number of SA spells between different occupational  
36 30 activities.

37  
38 31 The regions that show the most difference are the Chartered Community of Navarre and  
39 32 the Community of Madrid. It would be interesting to carry out further studies that  
40 33 analyse the main factors that influence SA in Spain.

41  
42 34 **Acknowledgments:** We would like to thank the National Institute of Social Security for  
43 35 helping with the databases.

44 36 **Contributorship statement:** MLAJ, MJAB, NMM, MTLM, and RMV conceived the  
45 37 original proposal and drafted the original manuscript. MLAJ, MJAB, NMM, and RMV  
46 38 contributed to the development and refinement and statistical analysis of the protocol.  
47 39 All authors critically appraised the drafted manuscript and made important intellectual  
48 40 contributions to the writing. All authors have read and approved the final submitted  
49 41 manuscript.

50  
51 42 **Funding:** The University of Malaga through a predoctoral grant supports MLAJ, a Ph.D.

1 student at the University.

2 **Conflicts of Interest:** All the authors declare that they have no conflict of interest.

3 **Patient consent for publication** Not required

4 **Data sharing statement:** All data relevant to the study are included in the article. Data  
5 are available in a public, open-access repository:

6 [www.seg-social.es/wps/portal/wss/internet/EstadisticasPresupuestosEstudios/](http://www.seg-social.es/wps/portal/wss/internet/EstadisticasPresupuestosEstudios/)

## 7 **KEY MESSAGES**

### 8 **What is already known about this subject?**

- 9 ➤ Sickness absence (SA) is one of the main causes of work absenteeism, loss of  
10 productivity and workers' health, permanent disability, and greater risk of disease,  
11 unemployment, and death in Spain and nearby countries.
- 12 ➤ Increasing efforts are being made to control SA and early reincorporation of workers  
13 who have suffered a period of SA due to disease or accident.

### 14 **What are the new findings?**

- 15 ➤ To our knowledge, it is the first research about SA spells a national analysis in Spain
- 16 ➤ There is a much higher incidence of SA in Spain among employees than among self-  
17 employed workers, whereas the average duration is much higher in the latter.
- 18 ➤ There are high numbers of SA spells among workers of the Public Administration in  
19 Spain, workers of call centers and workers of temporary employment agencies
- 20 ➤ The Chartered Community of Navarre has the highest incidence and the shortest  
21 duration of SA spells
- 22 ➤ The Community of Madrid has the lowest prevalence, incidence and average duration in  
23 work-related SA spells

### 24 **How could this affect clinical policies or practices in a predictable future?**

- 25 ➤ This implies the need to increase the effort to know the main factors that influence SA  
26 in Spain, the characteristics of the workers, and the activity they carry out.
- 27 ➤ It is essential to implement a strict control of the diseases with greater incidence and  
28 prevalence, studying the age ranges, sex and the characteristics of the job in which they  
29 are produced, in order to reduce the negative effects on healthcare, social and economic  
30 costs.

31

32

33

34

35

36

37

38

## 1 REFERENCES

- 1 2
- 3 1
- 4
- 5 2 1. Spasova, S., Bouget, D., & Vanhercke, B. *Sick pay and sickness benefit schemes in the*
- 6 3 *European Union. Background report for the Social Protection Committee's In-Depth*
- 7 4 *Review on sickness benefits.* (2016). doi:10.2767/531076
- 8
- 9 5 2. Ministerio de Trabajo, M. y S. S. *Presupuestos de la Seguridad Social.* (2019).
- 10
- 11 6 3. Lusinyan, L. & Bonato, L. Work absence in Europe. *IMF Staff Pap.* **54**, 475–538 (2007).
- 12 7 4. Alba-Ramírez, A. La incapacidad temporal para el trabajo: análisis económico de su
- 13 8 incidencia y su duración. *Univ. Carlos III. Madrid* **150**, (2009).
- 14
- 15 9 5. Peña Longobardo, L. M., Aranda Reneo, I., Oliva-Moreno, J. & Vall Castello, J.
- 16 10 Evaluación de las pérdidas laborales provocadas enfermedades y lesiones en España en
- 17 11 el año 2009. *Rev. Evaluación Programas y Políticas Públicas* **1**, 66 (2016).
- 18
- 19 12 6. Helgesson, M., Johansson, B., Nordqvist, T., Lundberg, I. & Vingard, E. Sickness
- 20 13 absence at a young age and later sickness absence, disability pension, death,
- 21 14 unemployment and income in native Swedes and immigrants. *Eur. J. Public Health* **25**,
- 22 15 688–692 (2015).
- 23
- 24 16 7. Virtanen, M. *et al.* Sickness absence as a risk factor for job termination, unemployment,
- 25 17 and disability pension among temporary and permanent employees. *Occup. Environ.*
- 26 18 *Med.* **63**, 212–217 (2006).
- 27
- 28 19 8. Salonen, L., Blomgren, J., Laaksonen, M. & Niemelä, M. Sickness absence as a
- 29 20 predictor of disability retirement in different occupational classes: A register-based study
- 30 21 of a working-age cohort in Finland in 2007-2014. *BMJ Open* **8**, 1–8 (2018).
- 31
- 32 22 9. Bryngelson, A. Long-term sickness absence and social exclusion. *Scand. J. Public*
- 33 23 *Health* **37**, 839–845 (2009).
- 34
- 35 24 10. Ferrie, J. E. *et al.* Diagnosis-specific sickness absence and all-cause mortality in the
- 36 25 GAZEL study. *J. Epidemiol. Community Health* **63**, 50–55 (2009).
- 37
- 38 26 11. Kivimäki, M. *et al.* Sickness absence as a global measure of health: Evidence from
- 39 27 mortality in the Whitehall II prospective cohort study. *Br. Med. J.* **327**, 364–368 (2003).
- 40
- 41 28 12. Gjesdal, S. *et al.* Mortality after long-term sickness absence: Prospective cohort study.
- 42 29 *Eur. J. Public Health* **18**, 517–521 (2008).
- 43
- 44 30 13. Gimeno, D., Benavides, F. G., Benach, J. & Amick, B. C. Distribution of sickness
- 45 31 absence in the European Union countries. *Occup. Environ. Med.* **61**, 867–869 (2004).
- 46
- 47 32 14. Benavides, F. G. *et al.* Evaluación de la gestión de los casos de incapacidad temporal por
- 48 33 contingencia común de más de 15 días en Cataluña. *Gac. Sanit.* **24**, 215–219 (2010).
- 49
- 50 34 15. Vicente-Herrero, M. T., Terradillos García, M. J., Capdevila Garcia, L. M., Ramírez
- 51 35 Iñiguez De La Torre, M. V. & López-González, Á. A. [Sick leaves caused by psychiatric
- 52 36 diseases in Spain during 2011]. *Rev. Med. Chil.* **141**, 248–54 (2013).
- 53
- 54 37 16. Benavides, F.G., Plana, M., Serra, C., Dominguez, R., Despuig, M., Aguirre, S., Soria,
- 55 38 M., Sampere, M., Gimeno, D. Return to Work After a Non-Work Related Sick Spell:
- 56 39 The Role of Age, Sex, Economic Activity and Autonomous Community. *Original* **81**,
- 57 40 183–190 (2007).
- 58
- 59 41 17. Cuesta, M. Tasas de absentismo por enfermedad en Epaña: datos para el periodo 1996-
- 60 42 2004. *Cuad. Econ.* **35**, 1–8 (2012).
- 43 18. Livanos, L. & Zangelidis, A. Sickness Absence: A Pan-European Study. *Munich Pers.*

1  
2  
3  
4  
5  
6  
7  
8  
9  
10  
11  
12  
13  
14  
15  
16  
17  
18  
19  
20  
21  
22  
23  
24  
25  
26  
27  
28  
29  
30  
31  
32  
33  
34  
35  
36  
37  
38  
39  
40  
41  
42  
43  
44  
45  
46  
47  
48  
49  
50  
51  
52  
53  
54  
55  
56  
57  
58  
59  
60

- 1 *RePEc Arch.* (2010).
- 2 19. Rosta, J., Tellnes, G. & Aasland, O. G. Differences in sickness absence between self-  
3 employed and employed doctors: A cross-sectional study on national sample of  
4 Norwegian doctors in 2010. *BMC Health Serv. Res.* **14**, 1–8 (2014).
- 5 20. Alba-Ramírez, A; López-Mourelo, E. Sickness absence from work in Spain: Are there  
6 gender differences? *UC3M Work. Pap.* **15–17**, (2017).
- 7 21. Pekkala, J., Blomgren, J., Pietiläinen, O., Lahelma, E. & Rahkonen, O. Occupational  
8 class differences in long sickness absence: A register-based study of 2.1 million Finnish  
9 women and men in 1996-2013. *BMJ Open* **7**, 1–8 (2017).
- 10 22. Mastekaasa, A. The gender gap in sickness absence: Long-term trends in eight European  
11 countries. *Eur. J. Public Health* **24**, 656–662 (2014).
- 12 23. Álvarez Theurer, E., Llergo Muñoz, A. & Vaquero Abellán, M. Análisis de la duración  
13 de los períodos de incapacidad temporal por procesos en Andalucía. Factores asociados.  
14 *Aten. Primaria* **41**, 387–393 (2009).
- 15 24. Laaksonen, M. *et al.* Gender differences in sickness absence - The contribution of  
16 occupation and workplace. *Scand. J. Work. Environ. Heal.* **36**, 394–403 (2010).
- 17 25. Ariansen, A. M. S. Age, occupational class and sickness absence during pregnancy: A  
18 retrospective analysis study of the norwegian population registry. *BMJ Open* **4**, 1–9  
19 (2014).
- 20 26. Llobet, C. V., Banqué, M., Fuentes, M. & Ojuel, J. Morbilidad diferencial entre mujeres  
21 y hombres. *Anu. Psicol.* **39**, 9–22 (2008).
- 22 27. Løset, G. K. *et al.* Gender equality in sickness absence tolerance: Attitudes and norms of  
23 sickness absence are not different for men and women. *PLoS One* **13**, 1–18 (2018).
- 24 28. Mastekaasa, A. & Melsom, A. M. Occupational segregation and gender differences in  
25 sickness absence : Evidence from 17 European countries Acknowledgement : We are  
26 grateful to the European Commission , Eurostat and to the original collecting agencies  
27 for access to the EU LFS ( 2008 relea.
- 28 29. Ármannsdóttir, B., Mårdby, A. C., Haukenes, I. & Hensing, G. Cumulative incidence of  
29 sickness absence and disease burden among the newly sick-listed, a cross-sectional  
30 population-based study. *BMC Public Health* **13**, (2013).
- 31 30. Zhang, W., McLeod, C. & Koehoorn, M. The relationship between chronic conditions  
32 and absenteeism and associated costs in Canada. *Scand. J. Work. Environ. Heal.* **42**,  
33 413–422 (2016).
- 34 31. Jakovljevic, M., Malmose-Stapelfeldt, C., Milovanovic, O., Rancic, N. & Bokonjic, D.  
35 Disability, Work Absenteeism, Sickness Benefits, and Cancer in Selected European  
36 OECD Countries—Forecasts to 2020. *Front. Public Heal.* **5**, 1–8 (2017).
- 37 32. Nexø, M. A. *et al.* Long-term sickness absence of 32 chronic conditions: A Danish  
38 register-based longitudinal study with up to 17 years of follow-up. *BMJ Open* **8**, 1–10  
39 (2018).
- 40 33. Hestbaek, L., Leboeuf-Yde, C. & Manniche, C. Low back pain: what is the long-term  
41 course? A review of studies of general patient populations. *Eur. Spine J.* **12**, 149–165  
42 (2003).
- 43 34. Steenstra, I. A., Verbeek, J. H., Heymans, M. W. & Bongers, P. M. Prognostic factors  
44 for duration of sick leave in patients sick listed with acute low back pain: A systematic  
45 review of the literature. *Occup. Environ. Med.* **62**, 851–860 (2005).



1  
2  
3  
4  
5  
6  
7  
8  
9  
10  
11  
12  
13  
14  
15  
16  
17  
18  
19  
20  
21  
22  
23  
24  
25  
26  
27  
28  
29  
30  
31  
32  
33  
34  
35  
36  
37  
38  
39  
40  
41  
42  
43  
44  
45  
46  
47  
48  
49  
50  
51  
52  
53  
54  
55  
56  
57  
58  
59  
60

- 1 35. Diaz-Ledezma, C. *et al.* Factors associated with variability in length of sick leave  
2 because of acute low back pain in Chile. *Spine J.* **9**, 1010–1015 (2009).
- 3 36. Crook, J., Milner, R., Schultz, I. Z. & Stringer, B. Determinants of occupational  
4 disability following a low back injury: A critical review of the literature. *Handb.*  
5 *Complex Occup. Disabil. Claims Early Risk Identification, Interv. Prev.* **12**, 169–189  
6 (2005).
- 7 37. Oke, A., Braithwaite, P. & Antai, D. Sickness absence and precarious employment: A  
8 comparative cross-national study of Denmark, Finland, Sweden, and Norway. *Int. J.*  
9 *Occup. Environ. Med.* **7**, 125–147 (2016).
- 10 38. Alexopoulos, E. C. *et al.* Sickness absence in the private sector of Greece: Comparing  
11 shipyard industry and national insurance data. *Int. J. Environ. Res. Public Health* **9**,  
12 1171–1181 (2012).
- 13 39. G. Benavides, F., Zaballa, E., Sanchez-Niubo, A., Gimeno Ruiz de Porras, D. & Duran,  
14 X. Incidence of non-work-related sickness absence in Spain by economic activity of the  
15 company. *Arch. Prev. Riesgos Labor.* **20**, 14–25 (2017).

## 19 Table legends

- 21 Table 1: Prevalence, incidence and average duration of sickness absence in Spain (2018)
- 22 Table 2. Sickness absence and average duration, by age and sex
- 23 Table 3. Average duration by diagnosis chapter (ICD-10)
- 24 Table 4. Sickness absence spells by diagnosis (ICD-10)
- 25 Table 5. Sickness absence spells by occupational activities (International Standard Industrial  
26 Classification of all Economic Activities, ISIC Rev-4)

Table 1: Prevalence, incidence and average duration of sickness absence in Spain (2018)

|                                | PREVALENCE          |               |              | INCIDENCE           |               |              | AVERAGE DURATION    |               |              |
|--------------------------------|---------------------|---------------|--------------|---------------------|---------------|--------------|---------------------|---------------|--------------|
|                                | NON-WORK-RELATED SA |               | WORK-RELATED | NON-WORK-RELATED SA |               | WORK-RELATED | NON-WORK-RELATED SA |               | WORK-RELATED |
|                                | EMPLOYED            | SELF-EMPLOYED |              | EMPLOYED            | SELF-EMPLOYED |              | EMPLOYED            | SELF-EMPLOYED |              |
| ANDALUSIA                      | 29,41               | 31,43         | 4,26         | 19,72               | 9,28          | 3,98         | 44,79               | 98,35         | 37,24        |
| ARAGON                         | 32,52               | 30,48         | 3,94         | 25,95               | 11,15         | 3,39         | 36,47               | 75,45         | 41,45        |
| PRINCIPALITY of ASTURIAS       | 36                  | 38,96         | 5,01         | 18,73               | 10,85         | 3,53         | 58,55               | 105,03        | 47,08        |
| BALEARIC ISLANDS               | 31,29               | 21,7          | 4,72         | 27,02               | 6,46          | 5,15         | 33,02               | 84,01         | 30,94        |
| CANARY ISLANDS                 | 40,45               | 26,45         | 3,85         | 25,23               | 7,96          | 3,51         | 48,53               | 100,87        | 38,17        |
| CANTABRIA                      | 39,77               | 38,68         | 4,84         | 23,38               | 10,92         | 3,18         | 51,39               | 108,36        | 50,14        |
| CASTILE and LEON               | 32,68               | 31,71         | 4,35         | 19,46               | 9,15          | 3,44         | 47,95               | 95,36         | 42,07        |
| CASTILE LA MANCHA              | 32,4                | 35,57         | 4,48         | 19,91               | 9,93          | 3,96         | 46,02               | 98,54         | 38,08        |
| CATALONIA                      | 35,14               | 28,76         | 3,8          | 36,37               | 10,17         | 3,6          | 28,54               | 83,48         | 36,06        |
| EXTREMADURA                    | 31,59               | 38,9          | 4,64         | 12,76               | 8,94          | 3,68         | 67,53               | 112,86        | 41,42        |
| GALICIA                        | 39,79               | 44,29         | 5,51         | 18,52               | 10,54         | 3,57         | 61,39               | 111,82        | 49,83        |
| COMMUNITY of MADRID            | 29,17               | 20,79         | 2,73         | 25,54               | 7,71          | 2,89         | 33,89               | 77,75         | 33,11        |
| MURCIA                         | 35,55               | 40,63         | 4,12         | 20,21               | 11,33         | 3,39         | 48,39               | 98,49         | 40,2         |
| CHARTERED COMMUNITY of NAVARRA | 35,73               | 30,72         | 4,28         | 43,87               | 16,46         | 3,88         | 24,64               | 55,15         | 37,86        |
| LA RIOJA                       | 27,3                | 25,65         | 4,41         | 25,28               | 10,91         | 3,91         | 34,53               | 69,95         | 38,87        |

|                       |       |       |      |       |       |      |       |       |       |
|-----------------------|-------|-------|------|-------|-------|------|-------|-------|-------|
| <b>VALENCIA</b>       | 30,68 | 29,28 | 4,4  | 18,06 | 8,79  | 3,34 | 49,29 | 96,3  | 42,34 |
| <b>BASQUE COUNTRY</b> | 39,58 | 28,3  | 3,84 | 31,15 | 10,52 | 3,96 | 38,16 | 79,6  | 36,55 |
| <b>NATIONAL TOTAL</b> | 32,98 | 30,48 | 3,99 | 24,98 | 9,51  | 3,55 | 38,81 | 91,38 | 38,23 |

For peer review only

Table 2. Sickness absence spells by age and sex

|                  | ANDALUSIA                  |            | ARAGON     |           | P. OF ASTURIAS |           | BALEARIC ISLANDS |           | CANARY ISLANDS |            | CANTABRIA  |           | CASTILE AND LEON |            | CASTILE LA MANCHA |           | CATALONIA  |            | EXTREMADURA |           | GALICIA   |            | COMMUNITY OF MADRID |            | REGION OF MURCIA |           | C. C. OF NAVARRE |           | LA RIOJA  |           | VALENCIA  |            | BASQUE COUNTRY |            |            |
|------------------|----------------------------|------------|------------|-----------|----------------|-----------|------------------|-----------|----------------|------------|------------|-----------|------------------|------------|-------------------|-----------|------------|------------|-------------|-----------|-----------|------------|---------------------|------------|------------------|-----------|------------------|-----------|-----------|-----------|-----------|------------|----------------|------------|------------|
|                  | Woman                      | Man        | Woman      | Man       | Woman          | Man       | Woman            | Man       | Woman          | Man        | Woman      | Man       | Woman            | Man        | Woman             | Man       | Woman      | Man        | Woman       | Man       | Woman     | Man        | Woman               | Man        | Woman            | Man       | Woman            | Man       | Woman     | Man       | Woman     | Man        | Woman          | Man        |            |
| 16-25            | Total workforce            | 28.519     | 30.319     | 7.211     | 9.576          | 1.836     | 2.100            | 11.010    | 10.470         | 11.404     | 9.813      | 2.235     | 2.292            | 6.859      | 9.934             | 7.294     | 10.106     | 92.204     | 83.921      | 2.064     | 2.793     | 6.082      | 7.549               | 43.592     | 42.510           | 5.649     | 7.818            | 5.488     | 7.886     | 1.457     | 2.034     | 15.154     | 18.327         | 8.401      | 12.209     |
|                  | Average affiliated workers | 6852.40    | 89.788.42  | 12715.03  | 17.792.34      | 5368.35   | 6.294.17         | 16392.26  | 19.260.69      | 19549.26   | 23.478.52  | 3792.28   | 4.565.60         | 16025.01   | 22.400.00         | 13405.17  | 21.951.23  | 112945.81  | 122.308.48  | 7057.99   | 11.732.44 | 17279.67   | 21.582.01           | 81635.82   | 97.705.09        | 13971.74  | 19.847.78        | 6659.14   | 8.653.16  | 2699.60   | 2.696.28  | 46147.56   | 56.875.39      | 17735.00   | 22.613.08  |
|                  | SA/1000 affiliates         | 34.67      | 28.14      | 47.26     | 44.85          | 28.5      | 27.8             | 55.97     | 45.29          | 48.61      | 34.82      | 49.11     | 41.83            | 35.67      | 36.96             | 45.34     | 38.36      | 68.02      | 57.17       | 24.37     | 19.83     | 29.33      | 29.14               | 44.5       | 36.25            | 33.69     | 32.82            | 68.67     | 75.94     | 44.97     | 45.85     | 27.36      | 26.85          | 39.47      | 44.99      |
|                  | Total days of SA           | 834.572    | 846.610    | 131.509   | 167.205        | 50.471    | 56.482           | 185.291   | 178.221        | 309.354    | 231.868    | 48.036    | 48.391           | 167.468    | 222.267           | 309.354   | 242.410    | 1.358.613  | 1.249.511   | 94.375    | 105.025   | 231.248    | 264.978             | 659.008    | 707.760          | 189.971   | 225.126          | 70.415    | 105.159   | 26.249    | 38.326    | 434.028    | 500.328        | 170.994    | 232.766    |
| Average duration | 29                         | 27         | 18         | 17        | 27             | 26        | 16               | 17        | 27             | 23         | 21         | 21        | 24               | 22         | 42                | 23        | 14         | 14         | 45          | 37        | 38        | 35         | 15                  | 16         | 33               | 28        | 12               | 13        | 18        | 18        | 28        | 27         | 20             | 19         |            |
| 26-35            | Total workforce            | 100.686    | 86.518     | 20.411    | 20.921         | 7.876     | 8.438            | 22.333    | 19.262         | 32.182     | 25.520     | 7.126     | 6.214            | 23.829     | 23.851            | 22.958    | 23.179     | 195.844    | 166.163     | 8.168     | 6.905     | 25.440     | 23.811              | 126.980    | 102.745          | 19.347    | 18.506           | 5.488     | 7.886     | 1.457     | 2.034     | 15.154     | 18.327         | 8.401      | 12.209     |
|                  | Average affiliated workers | 300.358.69 | 330.969.33 | 48.943.45 | 55.044.50      | 29.131.98 | 30.748.08        | 51.679.23 | 54.743.11      | 80.321.79  | 82.314.91  | 18.686.80 | 19.468.05        | 73.916.47  | 83.188.54         | 59.795.11 | 75.578.35  | 310.001.82 | 347.500.15  | 36.076.74 | 41.472.33 | 88.778.42  | 92.930.24           | 334.003.39 | 351.427.98       | 53.485.35 | 64.162.37        | 23.761.08 | 27.464.21 | 11.184.28 | 11.558.26 | 169.672.13 | 189.654.50     | 72.276.88  | 83.898.41  |
|                  | SA/1000 affiliates         | 27.93      | 21.78      | 34.75     | 31.67          | 22.53     | 22.87            | 36.01     | 29.32          | 33.39      | 25.84      | 31.78     | 26.60            | 26.86      | 23.89             | 32.00     | 25.55      | 52.65      | 39.85       | 18.87     | 13.87     | 23.88      | 21.35               | 31.68      | 24.36            | 30.14     | 24.04            | 52.48     | 51.62     | 33.13     | 36.82     | 24.45      | 19.81          | 37.83      | 34.70      |
|                  | Total days of SA           | 4.002.601  | 2.741.036  | 613.970   | 475.288        | 326.129   | 321.994          | 596.265   | 434.597        | 1.290.175  | 833.828    | 282.294   | 203.621          | 918.856    | 733.947           | 927.034   | 686.484    | 4.915.171  | 3.405.555   | 475.765   | 307.251   | 1.289.570  | 1.018.756           | 3.636.681  | 2.344.947        | 882.767   | 621.458          | 325.739   | 275.255   | 127.536   | 108.671   | 2.207.518  | 1.512.322      | 1.228.249  | 847.290    |
| Average duration | 39                         | 31         | 30         | 22        | 41             | 38        | 26               | 22        | 40             | 32         | 39         | 32        | 38               | 30         | 40                | 29        | 25         | 20         | 58          | 44        | 50        | 42         | 28                  | 22         | 45               | 33        | 21               | 16        | 28        | 21        | 44        | 33         | 35             | 24         |            |
| 36-45            | Total workforce            | 118.614    | 117.512    | 25.565    | 26.492         | 13.494    | 14.020           | 23.709    | 22.637         | 40.199     | 35.601     | 10.016    | 9.757            | 31.594     | 32.035            | 26.742    | 29.050     | 221.680    | 205.633     | 9.621     | 9.250     | 38.674     | 35.964              | 151.187    | 125.041          | 23.103    | 24.813           | 20.685    | 22.630    | 5.864     | 6.555     | 63.233     | 65.615         | 51.452     | 55.641     |
|                  | Average affiliated workers | 416.547.17 | 493.349.53 | 73.820.89 | 88.587.25      | 53.033.04 | 57.508.87        | 72.634.45 | 79.189.07      | 113.319.60 | 124.332.39 | 31.436.56 | 34.354.87        | 116.512.04 | 134.105.28        | 85.921.38 | 117.415.38 | 467.172.39 | 538.140.86  | 51.846.68 | 57.864.40 | 154.779.30 | 159.073.44          | 448.746.41 | 492.003.79       | 74.900.72 | 103.493.33       | 37.428.06 | 44.894.12 | 18.530.51 | 19.654.64 | 256.013.07 | 308.714.88     | 131.005.73 | 147.561.07 |
|                  | SA/1000 affiliates         | 23.73      | 19.85      | 28.86     | 24.92          | 21.20     | 20.32            | 27.20     | 23.82          | 29.56      | 23.86      | 26.55     | 23.67            | 22.60      | 19.91             | 25.94     | 20.62      | 39.54      | 31.96       | 15.46     | 13.32     | 20.82      | 18.84               | 28.08      | 21.18            | 25.70     | 19.98            | 46.06     | 42.02     | 26.37     | 27.79     | 20.58      | 17.71          | 32.73      | 31.42      |
|                  | Total days of SA           | 5485098    | 4853604    | 1017787   | 884342         | 729537    | 710147           | 871595    | 690262         | 1984219    | 1537765    | 522327    | 427368           | 1601141    | 1341221           | 1320806   | 1180792    | 7299940    | 5952905     | 684002    | 523399    | 2405243    | 1925240             | 5625202    | 4022176          | 1271496   | 1132594          | 584891    | 515533    | 216891    | 196201    | 3345778    | 2905621        | 2137768    | 1898819    |
| Average duration | 46                         | 41         | 39         | 33        | 54             | 50        | 36               | 30        | 49             | 43         | 52         | 43        | 50               | 41         | 49                | 40        | 32         | 28         | 71          | 56        | 62        | 53         | 37                  | 32         | 55               | 45        | 28               | 22        | 36        | 29        | 52        | 44         | 41             | 34         |            |
| 46-55            | Total workforce            | 93419      | 97446      | 20531     | 21134          | 12107     | 11379            | 19560     | 18340          | 33484      | 32340      | 7739      | 7993             | 27137      | 28786             | 20740     | 24528      | 161373     | 145283      | 9133      | 9654      | 32304      | 30656               | 116428     | 97152            | 17870     | 19928            | 17679     | 17432     | 4652      | 5523      | 52477      | 56490          | 44669      | 47083      |
|                  | Average affiliated workers | 376667.85  | 452781.53  | 72642.41  | 86832.17       | 50430.1   | 54182.72         | 59519.62  | 70647.25       | 103329.08  | 124900.1   | 27966.17  | 32274.09         | 121691.32  | 144244.47         | 78676.23  | 113500.26  | 420095.39  | 483766.12   | 48959.11  | 61304.89  | 155675.61  | 146483              | 392653.45  | 435113.09        | 63760.45  | 88653.91         | 36669.67  | 43790.26  | 16865.87  | 19151.91  | 227708.97  | 286020.66      | 132334.79  | 149918.57  |
|                  | SA/1000 affiliates         | 20.67      | 17.93      | 23.55     | 20.28          | 20.01     | 17.50            | 27.39     | 21.63          | 27.00      | 21.58      | 23.06     | 20.64            | 18.58      | 16.63             | 21.97     | 18.01      | 32.01      | 25.03       | 15.55     | 13.12     | 17.29      | 17.44               | 24.71      | 18.61            | 23.36     | 18.73            | 40.18     | 33.17     | 22.99     | 24.03     | 19.20      | 16.46          | 28.13      | 26.17      |
|                  | Total days of SA           | 5669205    | 5761219    | 1161473   | 1064204        | 892531    | 800712           | 986970    | 817858         | 2095638    | 1869968    | 514677    | 492931           | 1843156    | 1685686           | 1339820   | 1442138    | 7170290    | 6146120     | 756791    | 756088    | 2592300    | 2196003             | 5597323    | 4348939          | 1266827   | 1234944          | 690509    | 631366    | 226762    | 248332    | 3621543    | 3415316        | 2402084    | 2300411    |
| Average duration | 60                         | 59         | 56         | 50        | 73             | 70        | 50               | 44        | 62             | 57         | 66         | 61        | 67               | 58         | 64                | 58        | 44         | 42         | 82          | 78        | 80        | 71         | 48                  | 44         | 70               | 61        | 39               | 36        | 48        | 44        | 69        | 60         | 53             | 48         |            |
| 56-65            | Total workforce            | 54794      | 55337      | 13132     | 12022          | 9140      | 7504             | 11512     | 9850           | 16303      | 15530      | 5491      | 5206             | 18430      | 19782             | 11693     | 14709      | 85972      | 74294       | 6060      | 6574      | 22907      | 19711               | 67732      | 53708            | 11580     | 11798            | 9312      | 8423      | 2931      | 3133      | 33820      | 33628          | 28812      | 26181      |
|                  | Average affiliated workers | 225629.08  | 261355.04  | 45478.18  | 56875.03       | 34528.21  | 37293.19         | 34180.32  | 40291.24       | 48415.01   | 64110.82   | 18313.97  | 22216.8          | 81337.65   | 106472.69         | 44685.46  | 72066.5    | 237960.81  | 279504.05   | 30888.53  | 42159.4   | 87344.91   | 92663.59            | 217723.25  | 240497.55        | 35155.93  | 48115.93         | 21505.51  | 26507.11  | 10467.84  | 13056.28  | 128808.03  | 166094.89      | 82120.99   | 95280.63   |
|                  | SA/1000 affiliates         | 20.24      | 17.64      | 24.06     | 17.61          | 22.06     | 16.77            | 28.07     | 20.37          | 28.06      | 20.19      | 24.99     | 19.53            | 18.88      | 15.48             | 21.81     | 17.01      | 30.11      | 22.15       | 16.35     | 12.99     | 21.85      | 17.73               | 25.93      | 18.61            | 27.45     | 20.43            | 36.08     | 26.48     | 23.33     | 20.00     | 21.88      | 16.87          | 29.24      | 22.90      |
|                  | Total days of SA           | 5669205    | 5761219    | 1161473   | 1064204        | 892531    | 800712           | 986970    | 817858         | 2095638    | 1869968    | 514677    | 492931           | 1843156    | 1685686           | 1339820   | 1442138    | 7170290    | 6146120     | 756791    | 756088    | 2592300    | 2196003             | 5597323    | 4348939          | 1266827   | 1234944          | 690509    | 631366    | 226762    | 248332    | 3621543    | 3415316        | 2402084    | 2300411    |
| Average duration | 60                         | 59         | 56         | 50        | 73             | 70        | 50               | 44        | 62             | 57         | 66         | 61        | 67               | 58         | 64                | 58        | 44         | 42         | 82          | 78        | 80        | 71         | 48                  | 44         | 70               | 61        | 39               | 36        | 48        | 44        | 69        | 60         | 53             | 48         |            |

|                  |         |         |        |        |        |        |        |        |         |         |        |        |         |         |        |         |         |         |        |        |         |         |         |         |         |        |        |        |        |        |         |         |         |         |
|------------------|---------|---------|--------|--------|--------|--------|--------|--------|---------|---------|--------|--------|---------|---------|--------|---------|---------|---------|--------|--------|---------|---------|---------|---------|---------|--------|--------|--------|--------|--------|---------|---------|---------|---------|
| Total days of SA | 4016323 | 4392212 | 954029 | 886164 | 799503 | 654003 | 722340 | 644055 | 1270661 | 1239034 | 458470 | 446106 | 1611454 | 1563351 | 971777 | 1205977 | 5269955 | 4690436 | 567570 | 631405 | 2297445 | 1810405 | 4144067 | 3305759 | 1026123 | 969808 | 478852 | 457600 | 200637 | 200286 | 2884959 | 2773183 | 2023474 | 1882291 |
| Average duration | 73      | 79      | 72     | 73     | 87     | 87     | 62     | 65     | 77      | 79      | 83     | 85     | 87      | 79      | 83     | 81      | 61      | 63      | 95     | 96     | 100     | 91      | 61      | 61      | 88      | 82     | 51     | 54     | 68     | 63     | 85      | 82      | 70      | 71      |

  

|                            |          |          |         |         |         |         |         |         |       |         |         |        |         |         |         |         |          |          |         |         |         |        |          |          |         |         |        |         |        |        |         |         |         |         |
|----------------------------|----------|----------|---------|---------|---------|---------|---------|---------|-------|---------|---------|--------|---------|---------|---------|---------|----------|----------|---------|---------|---------|--------|----------|----------|---------|---------|--------|---------|--------|--------|---------|---------|---------|---------|
| Total workforce            | 1009     | 912      | 218     | 229     | 143     | 135     | 248     | 248     | 405   | 507     | 93      | 90     | 309     | 369     | 222     | 243     | 1499     | 1783     | 109     | 118     | 496     | 416    | 1427     | 1472     | 209     | 205     | 97     | 99      | 48     | 53     | 565     | 586     | 395     | 395     |
| Average affiliated workers | 11950.42 | 13802.04 | 2562.05 | 3147.87 | 2035.13 | 1864.38 | 2749.35 | 3794.28 | 3761  | 6238.89 | 1063.87 | 1151.9 | 4800.68 | 6608.46 | 2729.33 | 3896.45 | 16654.52 | 21595.24 | 1635.76 | 2118.84 | 6019.34 | 6010.7 | 14815.19 | 17812.54 | 2137.48 | 2850.03 | 976.63 | 1251.16 | 558.86 | 884.86 | 7419.14 | 9562.67 | 3943.04 | 4299.16 |
| SA/1000 affiliates         | 7.04     | 5.51     | 7.09    | 6.06    | 5.86    | 6.03    | 7.52    | 5.45    | 8.97  | 6.77    | 7.28    | 6.51   | 5.36    | 4.65    | 6.78    | 5.20    | 7.50     | 6.88     | 5.55    | 4.64    | 6.87    | 5.77   | 8.03     | 6.89     | 8.15    | 5.99    | 8.28   | 6.59    | 7.16   | 4.99   | 6.35    | 5.11    | 8.35    | 7.66    |
| Total days of SA           | 102994   | 86720    | 22938   | 20767   | 14254   | 15093   | 19474   | 21387   | 42070 | 54105   | 9941    | 8986   | 33554   | 36135   | 30606   | 23582   | 137904   | 164426   | 14652   | 13172   | 60119   | 49220  | 115468   | 116354   | 28423   | 19951   | 7095   | 8826    | 5266   | 4674   | 63313   | 59850   | 38371   | 34999   |
| Average duration           | 102      | 95       | 105     | 90      | 99      | 111     | 78      | 86      | 103   | 106     | 106     | 99     | 108     | 97      | 137     | 97      | 91       | 92       | 134     | 111     | 121     | 118    | 80       | 79       | 135     | 97      | 73     | 89      | 109    | 88     | 112     | 102     | 97      | 88      |

Table 3. Average duration by diagnostic chapter (ICD-10)

| DIAGNOSIS CHAPTER (I)                                                                                          | ANDALUSIA | ARAGON | P. OF ASTURIAS | BALEARIC ISLANDS | CANARY ISLANDS | CANTABRIA | CASTILE LEON | CASTILE LA MANCHA | CATALONIA | EXTREMADURA | GALICIA | COMMUNITY OF MADRID | REGION OF MURCIA | C. C. OF NAVARRRE | LA RIOJA | VALENCIA | BASQUE COUNTRY |
|----------------------------------------------------------------------------------------------------------------|-----------|--------|----------------|------------------|----------------|-----------|--------------|-------------------|-----------|-------------|---------|---------------------|------------------|-------------------|----------|----------|----------------|
| <i>I Certain infectious and parasitic diseases</i>                                                             | 14,91     | 7,87   | 9,33           | 5,50             | 9,13           | 6,40      | 14,69        | 14,89             | 5,09      | 16,92       | 17,39   | 6,58                | 8,03             | 3,87              | 4,69     | 9,50     | 9,19           |
| <i>II Neoplasms</i>                                                                                            | 109,78    | 120,16 | 131,05         | 123,93           | 102,69         | 113,30    | 124,41       | 131,66            | 99,47     | 136,05      | 134,20  | 87,92               | 109,89           | 105,09            | 104,53   | 121,97   | 142,86         |
| <i>III Diseases of the blood and blood-forming organs and certain disorders involving the immune mechanism</i> | 91,98     | 97,53  | 76,71          | 61,03            | 83,72          | 57,30     | 76,59        | 83,38             | 63,33     | 121,10      | 94,43   | 63,74               | 89,23            | 40,54             | 58,16    | 85,98    | 108,07         |
| <i>IV Endocrine, nutritional and metabolic diseases</i>                                                        | 72,54     | 67,72  | 66,06          | 50,60            | 64,70          | 81,62     | 57,53        | 72,88             | 59,03     | 78,47       | 88,73   | 56,96               | 81,66            | 43,03             | 48,54    | 71,53    | 81,06          |
| <i>V Mental and behavioural disorders</i>                                                                      | 95,17     | 90,37  | 99,28          | 56,11            | 83,26          | 111,34    | 95,30        | 94,54             | 72,03     | 114,42      | 110,52  | 78,88               | 111,86           | 65,66             | 70,64    | 98,46    | 116,66         |
| <i>VI Diseases of the nervous system</i>                                                                       | 79,81     | 61,81  | 85,12          | 49,46            | 70,50          | 65,51     | 78,55        | 74,37             | 44,98     | 80,11       | 95,84   | 54,49               | 78,03            | 26,40             | 44,64    | 79,21    | 70,51          |
| <i>VII Diseases of the eye and adnexa</i>                                                                      | 44,13     | 42,99  | 47,85          | 28,72            | 40,94          | 45,41     | 45,05        | 44,12             | 29,17     | 56,76       | 48,63   | 29,62               | 46,43            | 18,80             | 29,77    | 41,70    | 45,77          |
| <i>VIII Diseases of the ear and mastoid process</i>                                                            | 33,04     | 26,90  | 33,55          | 18,33            | 31,33          | 29,05     | 27,30        | 26,82             | 18,89     | 47,66       | 42,55   | 21,63               | 35,98            | 13,85             | 18,54    | 29,13    | 37,40          |
| <i>IX Diseases of the circulatory system</i>                                                                   | 103,40    | 107,05 | 102,25         | 85,73            | 90,19          | 108,21    | 99,35        | 104,24            | 79,86     | 106,57      | 111,53  | 76,86               | 112,64           | 80,66             | 90,12    | 101,52   | 119,39         |
| <i>X Diseases of the respiratory system</i>                                                                    | 11,98     | 10,67  | 14,22          | 9,05             | 12,46          | 11,07     | 13,02        | 13,47             | 8,27      | 19,76       | 16,42   | 9,70                | 12,34            | 6,40              | 7,68     | 11,87    | 17,11          |
| <i>XI Diseases of the digestive system</i>                                                                     | 30,65     | 35,44  | 44,16          | 28,59            | 39,97          | 43,95     | 21,86        | 35,59             | 27,19     | 50,51       | 47,53   | 32,56               | 41,01            | 14,97             | 30,98    | 40,84    | 37,32          |
| <i>XII Diseases of the skin and subcutaneous tissue</i>                                                        | 36,37     | 29,84  | 46,22          | 24,18            | 35,30          | 42,96     | 37,86        | 37,34             | 25,36     | 39,37       | 47,80   | 28,91               | 39,30            | 20,61             | 27,26    | 33,74    | 51,91          |

|                                                                                                      |       |       |       |       |       |        |       |        |       |       |       |       |       |       |       |       |       |
|------------------------------------------------------------------------------------------------------|-------|-------|-------|-------|-------|--------|-------|--------|-------|-------|-------|-------|-------|-------|-------|-------|-------|
| <i>XIII Diseases of the musculoskeletal system and connective tissue</i>                             | 70,24 | 66,93 | 79,55 | 50,35 | 65,45 | 75,67  | 70,00 | 71,17  | 54,13 | 85,89 | 85,54 | 56,26 | 73,79 | 43,11 | 52,76 | 71,05 | 92,61 |
| <i>XIV Diseases of the genitourinary system</i>                                                      | 40,71 | 31,78 | 44,27 | 25,30 | 35,36 | 34,11  | 35,01 | 33,76  | 27,97 | 46,14 | 45,16 | 31,83 | 43,51 | 15,56 | 32,25 | 37,08 | 52,86 |
| <i>XV Pregnancy, childbirth and the puerperium</i>                                                   | 76,91 | 53,45 | 51,51 | 53,46 | 81,32 | 61,09  | 59,29 | 72,56  | 63,73 | 70,08 | 68,09 | 51,74 | 73,30 | 60,24 | 57,10 | 73,43 | 67,00 |
| <i>XVII Congenital malformations, deformations and chromosomal abnormalities</i>                     | 86,30 | 69,19 | 56,00 | 73,00 | 86,22 | 121,65 | 80,30 | 107,03 | 61,09 | 94,00 | 99,25 | 41,00 | 75,00 | 50,00 | 37,76 | 71,33 | 90,33 |
| <i>XVIII Symptoms, signs and abnormal clinical and laboratory findings, not elsewhere classified</i> | 36,13 | 29,88 | 38,00 | 23,00 | 26,00 | 42,50  | 33,23 | 36,11  | 20,82 | 38,50 | 37,25 | 28,00 | 51,00 | 9,00  | 28,45 | 31,67 | 37,67 |
| <i>XIX Injury, poisoning and certain other consequences of external causes</i>                       | 59,88 | 59,12 | 72,00 | 45,00 | 59,00 | 69,17  | 66,63 | 52,48  | 53,12 | 70,00 | 71,75 | 55,00 | 65,00 | 45,00 | 53,45 | 58,67 | 81,00 |

(1) Chapters XX, XXI y XXII are not included because the number of cases is not significant

Table 4. Sickness absence spells by diagnosis (ICD-10)

| Autonomous Community of Spain   | Code                    | Diagnosis                                                                | SA / 1000 affiliates/per month                        |      |
|---------------------------------|-------------------------|--------------------------------------------------------------------------|-------------------------------------------------------|------|
| <b>Andalusia</b>                | M54.5                   | Low back pain                                                            | 1,36                                                  |      |
|                                 | K52                     | Other noninfective gastroenteritis and colitis                           | 1,00                                                  |      |
|                                 | J00                     | Acute nasopharyngitis (common cold)                                      | 0,83                                                  |      |
|                                 | J11                     | Influenza, virus not identified                                          | 0,82                                                  |      |
|                                 | M54.2                   | Cervicalgia                                                              | 0,57                                                  |      |
|                                 | M54.3                   | Sciatica                                                                 | 0,52                                                  |      |
|                                 | J02.9                   | Acute pharyngitis, unspecified                                           | 0,40                                                  |      |
|                                 | J03.9                   | Acute tonsillitis, unspecified                                           | 0,38                                                  |      |
|                                 | <b>Aragon</b>           | K52.9                                                                    | Noninfective gastroenteritis and colitis, unspecified | 1,94 |
|                                 |                         | J11                                                                      | Influenza, virus not identified                       | 1,28 |
| M54.5                           |                         | Low back pain                                                            | 1,16                                                  |      |
| J02.9                           |                         | Acute pharyngitis, unspecified                                           | 0,97                                                  |      |
| M25                             |                         | Other joint disorders, not elsewhere classified                          | 0,76                                                  |      |
| M54.3                           |                         | Sciatica                                                                 | 0,42                                                  |      |
| M54.2                           |                         | Cervicalgia                                                              | 0,41                                                  |      |
| F41                             |                         | Other anxiety disorders                                                  | 0,38                                                  |      |
| <b>Principality of Asturias</b> | K52.9                   | Noninfective gastroenteritis and colitis, unspecified                    | 1,03                                                  |      |
|                                 | M54.5                   | Low back pain                                                            | 0,83                                                  |      |
|                                 | F41                     | Other anxiety disorders                                                  | 0,80                                                  |      |
|                                 | J11                     | Influenza, virus not identified                                          | 0,55                                                  |      |
|                                 | M54.3                   | Sciatica                                                                 | 0,46                                                  |      |
|                                 | M54.2                   | Cervicalgia                                                              | 0,40                                                  |      |
|                                 | J02.9                   | Acute pharyngitis, unspecified                                           | 0,30                                                  |      |
|                                 | M23                     | Internal derangement of knee                                             | 0,29                                                  |      |
|                                 | <b>Balearic Islands</b> | K52.9                                                                    | Noninfective gastroenteritis and colitis, unspecified | 2,29 |
| M54.5                           |                         | Low back pain                                                            | 1,61                                                  |      |
| B97.8                           |                         | Other viral agents as the cause of diseases classified to other chapters | 1,26                                                  |      |
| J11                             |                         | Influenza, virus not identified                                          | 1,15                                                  |      |
| F41.9                           |                         | Anxiety disorder, unspecified                                            | 0,77                                                  |      |
| J03.9                           |                         | Acute tonsillitis, unspecified                                           | 0,72                                                  |      |
| J00                             |                         | Acute nasopharyngitis (common cold)                                      | 0,60                                                  |      |
| M54.3                           |                         | Sciatica                                                                 | 0,60                                                  |      |
| <b>Canary Islands</b>           |                         | M54.5                                                                    | Low back pain                                         | 1,40 |
|                                 | J11                     | Influenza, virus not identified                                          | 1,16                                                  |      |
|                                 | K52.9                   | Noninfective gastroenteritis and colitis, unspecified                    | 1,02                                                  |      |
|                                 | J00                     | Acute nasopharyngitis (common cold)                                      | 0,82                                                  |      |
|                                 | J20.9                   | Acute bronchitis, unspecified                                            | 0,59                                                  |      |
|                                 | F06.4                   | Organic anxiety disorder                                                 | 0,57                                                  |      |

|                          |       |                                                                                |      |
|--------------------------|-------|--------------------------------------------------------------------------------|------|
|                          | M54.3 | Sciatica                                                                       | 0,51 |
|                          | M54.2 | Cervicalgia                                                                    | 0,44 |
| <b>Cantabria</b>         | K52.9 | Noninfective gastroenteritis and colitis, unspecified                          | 1,64 |
|                          | J11   | Influenza, virus not identified                                                | 1,13 |
|                          | M54.5 | Low back pain                                                                  | 0,98 |
|                          | R45   | Symptoms and signs involving emotional state                                   | 0,69 |
|                          | J02.9 | Acute pharyngitis, unspecified                                                 | 0,67 |
|                          | J06   | Acute upper respiratory infections of multiple and unspecified sites           | 0,66 |
|                          | M54.3 | Sciatica                                                                       | 0,61 |
|                          | M54.2 | Cervicalgia                                                                    | 0,57 |
| <b>Castile and Leon</b>  | M54.5 | Low back pain                                                                  | 1,28 |
|                          | J11   | Influenza, virus not identified                                                | 0,86 |
|                          | F41.9 | Anxiety disorder, unspecified                                                  | 0,53 |
|                          | M54.3 | Sciatica                                                                       | 0,52 |
|                          | J98.8 | Other specified respiratory disorders                                          | 0,40 |
|                          | J06.9 | Acute upper respiratory infection, unspecified                                 | 0,37 |
|                          | J00   | Acute nasopharyngitis (common cold)                                            | 0,30 |
|                          | K52   | Other noninfective gastroenteritis and colitis                                 | 0,10 |
| <b>Castile La Mancha</b> | M54.5 | Low back pain                                                                  | 1,22 |
|                          | K52.9 | Noninfective gastroenteritis and colitis, unspecified                          | 0,79 |
|                          | J00   | Acute nasopharyngitis (common cold)                                            | 0,62 |
|                          | J11   | Influenza, virus not identified                                                | 0,53 |
|                          | K52   | Other noninfective gastroenteritis and colitis                                 | 0,50 |
|                          | J03.9 | Acute tonsillitis, unspecified                                                 | 0,43 |
|                          | M54.2 | Cervicalgia                                                                    | 0,39 |
|                          | M54.3 | Sciatica                                                                       | 0,37 |
| <b>Catalonia</b>         | K52.9 | Noninfective gastroenteritis and colitis, unspecified                          | 2,82 |
|                          | J00   | Acute nasopharyngitis (common cold)                                            | 2,09 |
|                          | M54.5 | Low back pain                                                                  | 1,96 |
|                          | J11   | Influenza, virus not identified                                                | 1,58 |
|                          | F41.9 | Anxiety disorder, unspecified                                                  | 1,40 |
|                          | B97.8 | Other viral agents as the cause of diseases classified to other chapters       | 1,05 |
|                          | J03.9 | Acute tonsillitis, unspecified                                                 | 0,85 |
|                          | M54.2 | Cervicalgia                                                                    | 0,68 |
| <b>Extremadura</b>       | M54.5 | Low back pain                                                                  | 0,76 |
|                          | J11   | Influenza, virus not identified                                                | 0,49 |
|                          | S93   | Dislocation, sprain and strain of joints and ligaments at ankle and foot level | 0,28 |
|                          | M54.2 | Cervicalgia                                                                    | 0,23 |
|                          | M54.3 | Sciatica                                                                       | 0,20 |
|                          | F41   | Other anxiety disorders                                                        | 0,18 |



|                                       |       |                                                                                |      |
|---------------------------------------|-------|--------------------------------------------------------------------------------|------|
|                                       | M54.9 | Dorsalgia, unspecified                                                         | 0,17 |
|                                       | M75   | Shoulder lesions                                                               | 0,14 |
| <b>Galicia</b>                        | M54.5 | Low back pain                                                                  | 1,19 |
|                                       | J11   | Influenza, virus not identified                                                | 0,94 |
|                                       | M54.2 | Cervicalgia                                                                    | 0,47 |
|                                       | F41   | Other anxiety disorders                                                        | 0,44 |
|                                       | J20.9 | Acute bronchitis, unspecified                                                  | 0,42 |
|                                       | M54.3 | Sciatica                                                                       | 0,30 |
|                                       | J03.9 | Acute tonsillitis, unspecified                                                 | 0,28 |
|                                       | S93   | Dislocation, sprain and strain of joints and ligaments at ankle and foot level | 0,24 |
| <b>Community of Madrid</b>            | K52.9 | Noninfective gastroenteritis and colitis, unspecified                          | 1,51 |
|                                       | M54.5 | Low back pain                                                                  | 0,90 |
|                                       | F41   | Other anxiety disorders                                                        | 0,76 |
|                                       | J02.9 | Acute pharyngitis, unspecified                                                 | 0,67 |
|                                       | J11   | Influenza, virus not identified                                                | 0,53 |
|                                       | M25   | Other joint disorders, not elsewhere classified                                | 0,48 |
|                                       | M54.3 | Sciatica                                                                       | 0,45 |
|                                       | J06.9 | Acute upper respiratory infection, unspecified                                 | 0,43 |
| <b>Region of Murcia</b>               | K52.9 | Noninfective gastroenteritis and colitis, unspecified                          | 1,21 |
|                                       | J11   | Influenza, virus not identified                                                | 1,16 |
|                                       | M54.5 | Low back pain                                                                  | 1,13 |
|                                       | J02.9 | Acute pharyngitis, unspecified                                                 | 0,82 |
|                                       | M54.3 | Sciatica                                                                       | 0,69 |
|                                       | R45   | Symptoms and signs involving emotional state                                   | 0,62 |
|                                       | M54.2 | Cervicalgia                                                                    | 0,55 |
|                                       | J06.9 | Acute upper respiratory infection, unspecified                                 | 0,41 |
| <b>Chartered Community of Navarre</b> | K52.9 | Noninfective gastroenteritis and colitis, unspecified                          | 3,08 |
|                                       | J11   | Influenza, virus not identified                                                | 2,52 |
|                                       | M54.5 | Low back pain                                                                  | 1,88 |
|                                       | J06.9 | Acute upper respiratory infection, unspecified                                 | 1,62 |
|                                       | J00   | Acute nasopharyngitis (common cold)                                            | 1,26 |
|                                       | A08.5 | Other specified intestinal infections                                          | 0,98 |
|                                       | J20.9 | Acute bronchitis, unspecified                                                  | 0,95 |
|                                       | F41.9 | Anxiety disorder, unspecified                                                  | 0,89 |
| <b>La Rioja</b>                       | K52.9 | Noninfective gastroenteritis and colitis, unspecified                          | 2,20 |
|                                       | J00   | Acute nasopharyngitis (common cold)                                            | 1,42 |
|                                       | J11   | Influenza, virus not identified                                                | 1,14 |
|                                       | M54.5 | Low back pain                                                                  | 1,10 |
|                                       | M54.3 | Sciatica                                                                       | 0,56 |

|                       |       |                                                       |      |
|-----------------------|-------|-------------------------------------------------------|------|
|                       | J06.9 | Acute upper respiratory infection, unspecified        | 0,39 |
|                       | M25.5 | Pain in joint                                         | 0,36 |
|                       | R45.0 | Nervousness                                           | 0,35 |
| <b>Valencia</b>       | M54.5 | Low back pain                                         | 1,04 |
|                       | J11   | Influenza, virus not identified                       | 0,85 |
|                       | F41.9 | Anxiety disorder, unspecified                         | 0,56 |
|                       | K52.9 | Noninfective gastroenteritis and colitis, unspecified | 0,55 |
|                       | J00   | Acute nasopharyngitis (common cold)                   | 0,45 |
|                       | M54.2 | Cervicalgia                                           | 0,39 |
|                       | M54.3 | Sciatica                                              | 0,33 |
|                       | J20.9 | Acute bronchitis, unspecified                         | 0,32 |
| <b>Basque Country</b> | M54.5 | Low back pain                                         | 1,83 |
|                       | M54.2 | Cervicalgia                                           | 1,68 |
|                       | J00   | Acute nasopharyngitis (common cold)                   | 0,91 |
|                       | K52.9 | Noninfective gastroenteritis and colitis, unspecified | 0,75 |
|                       | J11   | Influenza, virus not identified                       | 0,63 |
|                       | F43.2 | Adjustment disorders                                  | 0,56 |
|                       | F41.9 | Anxiety disorder, unspecified                         | 0,49 |
|                       | R10   | Abdominal and pelvic pain                             | 0,35 |

Table 5. Sickness absence situations by occupational activities (International Standard Industrial Classification of all Economic Activities, ISIC Rev-4)

| Autonomous Community | Code | Occupational Activities                                                             | SA spells | SA / 1000 affiliates |
|----------------------|------|-------------------------------------------------------------------------------------|-----------|----------------------|
| <b>Andalusia</b>     | 8411 | General public administration activities                                            | 61.457    | 30,84                |
|                      | 8610 | Hospital activities                                                                 | 40.544    | 20,30                |
|                      | 8121 | General cleaning of buildings                                                       | 23.802    | 18,89                |
|                      | 5610 | Restaurants and mobile food service activities                                      | 23.377    | 28,5                 |
|                      | 5630 | Beverage serving activities                                                         | 20.659    | 10,74                |
|                      | 4100 | Construction of buildings                                                           | 16.608    | 10,22                |
|                      | 4711 | Retail sale in non-specialized stores with food, beverages or tobacco predominating | 16.253    | 9                    |
|                      | 5510 | Hotels and similar accommodation                                                    | 16.061    | 20,05                |
|                      | 4630 | Wholesale of food, beverage and tobacco                                             | 15.010    | 9,72                 |
|                      | 8220 | Activities of call centres                                                          | 14.652    | 69,07                |
| <b>Aragon</b>        | 8411 | General public administration activities                                            | 9.685     | 23,30                |

|                                 |      |                                                                                     |        |       |
|---------------------------------|------|-------------------------------------------------------------------------------------|--------|-------|
|                                 | 8610 | Hospital activities                                                                 | 8.022  | 16,61 |
|                                 | 7820 | Temporary employment agency activities                                              | 7.550  | 73,50 |
|                                 | 2930 | Manufacture of parts and accessories of motor vehicles                              | 5.874  | 11,70 |
|                                 | 8121 | General cleaning of buildings                                                       | 5.464  | 21,78 |
|                                 | 4711 | Retail sale in non-specialized stores with food, beverages or tobacco predominating | 3.773  | 5,3   |
|                                 | 5610 | Restaurants and mobile food service activities                                      | 3.669  | 28,5  |
|                                 | 8220 | Activities of call centres                                                          | 3.459  | 43    |
|                                 | 4923 | Freight transport by road                                                           | 3.214  | 15,57 |
|                                 | 5630 | Beverage serving activities                                                         | 3.073  | 10,95 |
| <b>Principality of Asturias</b> | 8610 | Hospital activities                                                                 | 6.422  | 20,65 |
|                                 | 4711 | Retail sale in non-specialized stores with food, beverages or tobacco predominating | 5.217  | 9,56  |
|                                 | 8411 | General public administration activities                                            | 4.000  | 19,21 |
|                                 | 5630 | Beverage serving activities                                                         | 2.560  | 10,46 |
|                                 | 2410 | Manufacture of basic iron and steel                                                 | 2.330  | 12,08 |
|                                 | 8121 | General cleaning of buildings                                                       | 2.285  | 13,6  |
|                                 | 5610 | Restaurants and mobile food service activities                                      | 2.047  | 22,45 |
|                                 | 8730 | Residential care activities for the elderly and disabled                            | 1.950  | 20,82 |
|                                 | 8122 | Other building and industrial cleaning activities                                   | 1.651  | 18    |
|                                 | 9700 | Activities of households as employers of domestic personnel                         | 1.365  | 8,51  |
| <b>Balearic Islands</b>         | 5510 | Hotels and similar accommodation                                                    | 19.736 | 30,31 |
|                                 | 5610 | Restaurants and mobile food service activities                                      | 9.399  | 13,6  |
|                                 | 8610 | Hospital activities                                                                 | 8.059  | 26,49 |
|                                 | 8411 | General public administration activities                                            | 6.141  | 27,19 |
|                                 | 4100 | Construction of buildings                                                           | 6.129  | 13    |
|                                 | 4711 | Retail sale in non-specialized stores with                                          | 5.078  | 8,44  |

|                         |      |                                                                                     |        |       |
|-------------------------|------|-------------------------------------------------------------------------------------|--------|-------|
|                         |      | food, beverages or tobacco predominating                                            |        |       |
|                         | 5630 | Beverage serving activities                                                         | 4.740  | 8,32  |
|                         | 8121 | General cleaning of buildings                                                       | 4.125  | 16,70 |
|                         | 5520 | Short term accommodation activities                                                 | 3.034  | 12,56 |
|                         | 4751 | Retail sale of textiles in specialized stores                                       | 2.408  | 21,6  |
| <b>Canary Islands</b>   | 5510 | Hotels and similar accommodation                                                    | 26.147 | 43,13 |
|                         | 8610 | Hospital activities                                                                 | 16.865 | 30,7  |
|                         | 8411 | General public administration activities                                            | 15.899 | 31,59 |
|                         | 5610 | Restaurants and mobile food service activities                                      | 11.628 | 18,32 |
|                         | 4711 | Retail sale in non-specialized stores with food, beverages or tobacco predominating | 10.495 | 7,9   |
|                         | 5520 | Short term accommodation activities                                                 | 7.221  | 32,30 |
|                         | 8121 | General cleaning of buildings                                                       | 7.000  | 18,7  |
|                         | 5630 | Beverage serving activities                                                         | 5.507  | 8,36  |
|                         | 4100 | Construction of buildings                                                           | 5.414  | 11,70 |
|                         | 8521 | General secondary education                                                         | 5.340  | 12,13 |
| <b>Cantabria</b>        | 8411 | General public administration activities                                            | 3.851  | 28,5  |
|                         | 7820 | Temporary employment agency activities                                              | 3.612  | 76,53 |
|                         | 8610 | Hospital activities                                                                 | 3.492  | 20,09 |
|                         | 8121 | General cleaning of buildings                                                       | 1.828  | 17,11 |
|                         | 5610 | Restaurants and mobile food service activities                                      | 1.616  | 22,5  |
|                         | 5630 | Beverage serving activities                                                         | 1.383  | 10,97 |
|                         | 8220 | Activities of call centres                                                          | 1.170  | 60    |
|                         | 8521 | General secondary education                                                         | 1.170  | 8,38  |
|                         | 4791 | Retail sale via mail order houses or via Internet                                   | 1.023  | 16,8  |
|                         | 8620 | Medical and dental practice activities                                              | 998    | 32    |
| <b>Castile and Leon</b> | 8411 | General public administration activities                                            | 9.940  | 16,89 |
|                         | 8610 | Hospital activities                                                                 | 9.741  | 12,04 |
|                         | 8220 | Activities of call centres                                                          | 8.920  | 85,14 |
|                         | 8121 | General cleaning of buildings                                                       | 7.489  | 17,87 |

|                          |      |                                                                                     |        |       |
|--------------------------|------|-------------------------------------------------------------------------------------|--------|-------|
|                          | 4711 | Retail sale in non-specialized stores with food, beverages or tobacco predominating | 5.953  | 7,94  |
|                          | 8790 | Other residential care activities                                                   | 5.089  | 21,95 |
|                          | 5630 | Beverage serving activities                                                         | 5.023  | 14,59 |
|                          | 7820 | Temporary employment agency activities                                              | 4.676  | 45,75 |
|                          | 5610 | Restaurants and mobile food service activities                                      | 4.493  | 24,90 |
|                          | 2910 | Manufacture of motor vehicles                                                       | 4.409  | 10,35 |
| <b>Castile La Mancha</b> | 8411 | General public administration activities                                            | 15.003 | 22,17 |
|                          | 8610 | Hospital activities                                                                 | 7.820  | 14,89 |
|                          | 8121 | General cleaning of buildings                                                       | 5.363  | 19,98 |
|                          | 7820 | Temporary employment agency activities                                              | 5.272  | 56,70 |
|                          | 5210 | Warehousing and storage                                                             | 5.251  | 60    |
|                          | 4100 | Construction of buildings                                                           | 4.479  | 8,94  |
|                          | 4711 | Retail sale in non-specialized stores with food, beverages or tobacco predominating | 4.267  | 5,06  |
|                          | 5610 | Restaurants and mobile food service activities                                      | 4.092  | 32,54 |
|                          | 4923 | Freight transport by road                                                           | 3.846  | 14,08 |
|                          | 5630 | Beverage serving activities                                                         | 3.526  | 10,62 |
| <b>Catalonia</b>         | 8610 | Hospital activities                                                                 | 75.958 | 32,68 |
|                          | 8411 | General public administration activities                                            | 70.569 | 32,11 |
|                          | 5610 | Restaurants and mobile food service activities                                      | 45.084 | 47    |
|                          | 8121 | General cleaning of buildings                                                       | 44.117 | 22,8  |
|                          | 7820 | Temporary employment agency activities                                              | 43.109 | 73,56 |
|                          | 8220 | Activities of call centres                                                          | 37.877 | 74,91 |
|                          | 4711 | Retail sale in non-specialized stores with food, beverages or tobacco predominating | 30.528 | 12,95 |
|                          | 4751 | Retail sale of textiles in specialized stores                                       | 24.417 | 10,36 |
|                          | 8812 | Social work activities without accommodation for the elderly and disabled           | 20.007 | 43,56 |
|                          | 8423 | Public order and safety                                                             | 19.807 | 65    |

|                            |      |                                                                                     |        |       |
|----------------------------|------|-------------------------------------------------------------------------------------|--------|-------|
|                            |      | activities                                                                          |        |       |
| <b>Extremadura</b>         | 8411 | General public administration activities                                            | 10.813 | 23,68 |
|                            | 8610 | Hospital activities                                                                 | 5.921  | 17,95 |
|                            | 8121 | General cleaning of buildings                                                       | 2.007  | 19,56 |
|                            | 8812 | Social work activities without accommodation for the elderly and disabled           | 1.643  | 18    |
|                            | 4100 | Construction of buildings                                                           | 1.610  | 7,48  |
|                            | 5630 | Beverage serving activities                                                         | 1.599  | 10,55 |
|                            | 4711 | Retail sale in non-specialized stores with food, beverages or tobacco predominating | 1.136  | 3,98  |
|                            | 5610 | Restaurants and mobile food service activities                                      | 1.044  | 13,64 |
|                            | 4923 | Freight transport by road                                                           | 914    | 12,89 |
|                            | 0150 | Mixed farming                                                                       | 902    | 8,79  |
| <b>Galicia</b>             | 8610 | Hospital activities                                                                 | 12.552 | 16,6  |
|                            | 8411 | General public administration activities                                            | 12.137 | 19,12 |
|                            | 4711 | Retail sale in non-specialized stores with food, beverages or tobacco predominating | 7.498  | 6,4   |
|                            | 5630 | Beverage serving activities                                                         | 6.532  | 12    |
|                            | 8121 | General cleaning of buildings                                                       | 5.775  |       |
|                            | 7820 | Temporary employment agency activities                                              | 5.270  | 40,61 |
|                            | 9700 | Activities of households as employers of domestic personnel                         | 4.830  | 11,45 |
|                            | 5610 | Restaurants and mobile food service activities                                      | 4.664  | 17,6  |
|                            | 8220 | Activities of call centres                                                          | 4.558  | 47,19 |
|                            | 4100 | Construction of buildings                                                           | 3.622  | 5,27  |
| <b>Community of Madrid</b> | 8610 | Hospital activities                                                                 | 44.482 | 17,65 |
|                            | 8121 | General cleaning of buildings                                                       | 42.703 | 20,63 |
|                            | 5610 | Restaurants and mobile food service activities                                      | 36.939 | 28,54 |
|                            | 4711 | General public administration activities                                            | 35.475 | 21,94 |
|                            | 8220 | Activities of call centres                                                          | 29.212 | 67,3  |
|                            | 4711 | Retail sale in non-specialized stores with food, beverages or                       | 28.014 | 7,57  |

|                                       |      |                                                                                     |        |       |
|---------------------------------------|------|-------------------------------------------------------------------------------------|--------|-------|
|                                       |      | tobacco predominating                                                               |        |       |
|                                       | 9700 | Activities of households as employers of domestic personnel                         | 21.385 | 20,93 |
|                                       | 8299 | Other business support service activities n.e.c                                     | 20.351 | 13    |
|                                       | 5630 | Beverage serving activities                                                         | 17.608 | 12,05 |
|                                       | 4751 | Retail sale of textiles in specialized stores                                       | 15.735 | 15,31 |
| <b>Region of Murcia</b>               | 8620 | Medical and dental practice activities                                              | 11.008 | 34,8  |
|                                       | 0113 | Growing of vegetables and melons, roots and tubers                                  | 7.233  | 28,29 |
|                                       | 7820 | Temporary employment agency activities                                              | 6.037  | 23,35 |
|                                       | 4711 | General public administration activities                                            | 6.003  | 24,41 |
|                                       | 8121 | General cleaning of buildings                                                       | 4.915  | 25,01 |
|                                       | 5610 | Restaurants and mobile food service activities                                      | 3.672  | 34,02 |
|                                       | 5630 | Beverage serving activities                                                         | 3.635  | 21,63 |
|                                       | 4630 | Wholesale of food, beverage and tobacco                                             | 3.514  | 13,62 |
|                                       | 4711 | Retail sale in non-specialized stores with food, beverages or tobacco predominating | 3.228  | 8,96  |
|                                       | 4923 | Freight transport by road                                                           | 2,914  | 14,28 |
| <b>Chartered Community of Navarre</b> | 8610 | Hospital activities                                                                 | 14.408 | 46,16 |
|                                       | 8411 | General public administration activities                                            | 7.408  | 57,01 |
|                                       | 2930 | Manufacture of parts and accessories of motor vehicles                              | 5.782  | 18,2  |
|                                       | 7820 | Temporary employment agency activities                                              | 5.558  | 94,19 |
|                                       | 8521 | General secondary education                                                         | 3.909  | 19,86 |
|                                       | 8121 | General cleaning of buildings                                                       | 3.520  | 31,17 |
|                                       | 1030 | Processing and preserving of fruit and vegetables                                   | 3.256  | 38,37 |
|                                       | 2910 | Manufacture of motor vehicles                                                       | 3.195  | 17,07 |
|                                       | 8812 | Social work activities without accommodation for the elderly and                    | 3.151  | 76,35 |

|                       |      |                                                                                     |        |       |
|-----------------------|------|-------------------------------------------------------------------------------------|--------|-------|
|                       |      | disabled                                                                            |        |       |
|                       | 9700 | Activities of households as employers of domestic personnel                         | 2.382  | 23,71 |
| <b>La Rioja</b>       | 8610 | Hospital activities                                                                 | 1.698  | 18,25 |
|                       | 8611 | General public administration activities                                            | 1.612  | 22,76 |
|                       | 1520 | Manufacture of footwear                                                             | 1.463  | 38,2  |
|                       | 8121 | General cleaning of buildings                                                       | 1.290  | 29,05 |
|                       | 1030 | Processing and preserving of fruit and vegetables                                   | 1.217  | 27,4  |
|                       | 7820 | Temporary employment agency activities                                              | 1.060  | 71,12 |
|                       | 2930 | Manufacture of parts and accessories of motor vehicles                              | 1.006  | 12,1  |
|                       | 5630 | Beverage serving activities                                                         | 973    | 14,3  |
|                       | 1102 | Manufacture of wines                                                                | 962    | 13,09 |
|                       | 0113 | Growing of vegetables and melons, roots and tubers                                  | 907    | 21,5  |
| <b>Valencia</b>       | 8610 | Hospital activities                                                                 | 24.063 | 21,57 |
|                       | 8611 | General public administration activities                                            | 23.311 | 24,51 |
|                       | 5610 | Restaurants and mobile food service activities                                      | 16.234 | 20,93 |
|                       | 8121 | General cleaning of buildings                                                       | 12.758 | 16,04 |
|                       | 4711 | Retail sale in non-specialized stores with food, beverages or tobacco predominating | 11.239 | 6,14  |
|                       | 4630 | Wholesale of food, beverage and tobacco                                             | 7.300  | 8,81  |
|                       | 5630 | Beverage serving activities                                                         | 8.732  | 6,49  |
|                       | 4923 | Freight transport by road                                                           | 7.300  | 11,49 |
|                       | 7820 | Temporary employment agency activities                                              | 7.126  | 29,24 |
|                       | 4100 | Construction of buildings                                                           | 6.663  | 6,21  |
| <b>Basque Country</b> | 8610 | Hospital activities                                                                 | 22.704 | 30,48 |
|                       | 8611 | General public administration activities                                            | 15.565 | 27,16 |
|                       | 8121 | General cleaning of buildings                                                       | 13.043 | 29,20 |
|                       | 8521 | General secondary education                                                         | 12.519 | 14,51 |
|                       | 8812 | Social work activities without accommodation for the elderly and                    | 8.760  | 14,75 |



|  |      |                                                                                     |       |       |
|--|------|-------------------------------------------------------------------------------------|-------|-------|
|  |      | disabled                                                                            |       |       |
|  | 5610 | Restaurants and mobile food service activities                                      | 8.419 | 29,01 |
|  | 4711 | Retail sale in non-specialized stores with food, beverages or tobacco predominating | 6.625 | 6,6   |
|  | 9700 | Activities of households as employers of domestic personnel                         | 6.284 | 18,55 |
|  | 2591 | Forging, pressing, stamping and roll-forming of metal; powder metallurgy            | 6.086 | 10,29 |
|  | 5630 | Beverage serving activities                                                         | 5.842 | 18,02 |

STROBE Statement—Checklist of items that should be included in reports of *cohort studies*

|                              | Item No | Recommendation                                                                                                                                                                                    | Page No |
|------------------------------|---------|---------------------------------------------------------------------------------------------------------------------------------------------------------------------------------------------------|---------|
| <b>Title and abstract</b>    | 1       | (a) Indicate the study's design with a commonly used term in the title or the abstract                                                                                                            | 1       |
|                              |         | (b) Provide in the abstract an informative and balanced summary of what was done and what was found                                                                                               | 1       |
| <b>Introduction</b>          |         |                                                                                                                                                                                                   |         |
| Background/rationale         | 2       | Explain the scientific background and rationale for the investigation being reported                                                                                                              | 3       |
| Objectives                   | 3       | State specific objectives, including any prespecified hypotheses                                                                                                                                  | 4       |
| <b>Methods</b>               |         |                                                                                                                                                                                                   |         |
| Study design                 | 4       | Present key elements of study design early in the paper                                                                                                                                           | 4       |
| Setting                      | 5       | Describe the setting, locations, and relevant dates, including periods of recruitment, exposure, follow-up, and data collection                                                                   | 4-5     |
| Participants                 | 6       | (a) Give the eligibility criteria, and the sources and methods of selection of participants. Describe methods of follow-up                                                                        | 4-5     |
|                              |         | (b) For matched studies, give matching criteria and number of exposed and unexposed                                                                                                               | 5       |
| Variables                    | 7       | Clearly define all outcomes, exposures, predictors, potential confounders, and effect modifiers. Give diagnostic criteria, if applicable                                                          | 5       |
| Data sources/<br>measurement | 8*      | For each variable of interest, give sources of data and details of methods of assessment (measurement). Describe comparability of assessment methods if there is more than one group              | 5       |
| Bias                         | 9       | Describe any efforts to address potential sources of bias                                                                                                                                         | 5       |
| Study size                   | 10      | Explain how the study size was arrived at                                                                                                                                                         | 5       |
| Quantitative variables       | 11      | Explain how quantitative variables were handled in the analyses. If applicable, describe which groupings were chosen and why                                                                      | 5       |
| Statistical methods          | 12      | (a) Describe all statistical methods, including those used to control for confounding                                                                                                             | 5       |
|                              |         | (b) Describe any methods used to examine subgroups and interactions                                                                                                                               | 5       |
|                              |         | (c) Explain how missing data were addressed                                                                                                                                                       | 5       |
|                              |         | (d) If applicable, explain how loss to follow-up was addressed                                                                                                                                    | 5       |
|                              |         | (e) Describe any sensitivity analyses                                                                                                                                                             | 5       |
| <b>Results</b>               |         |                                                                                                                                                                                                   |         |
| Participants                 | 13*     | (a) Report numbers of individuals at each stage of study—eg numbers potentially eligible, examined for eligibility, confirmed eligible, included in the study, completing follow-up, and analysed | 5       |
|                              |         | (b) Give reasons for non-participation at each stage                                                                                                                                              | 5       |
|                              |         | (c) Consider use of a flow diagram                                                                                                                                                                | -       |
| Descriptive data             | 14*     | (a) Give characteristics of study participants (eg demographic, clinical, social) and information on exposures and potential confounders                                                          | 5       |
|                              |         | (b) Indicate number of participants with missing data for each variable of interest                                                                                                               | 5       |
|                              |         | (c) Summarise follow-up time (eg, average and total amount)                                                                                                                                       | 5       |
| Outcome data                 | 15*     | Report numbers of outcome events or summary measures over time                                                                                                                                    | 6       |

|    |                          |    |                                                                                                                                                                                                              |     |
|----|--------------------------|----|--------------------------------------------------------------------------------------------------------------------------------------------------------------------------------------------------------------|-----|
| 1  | Main results             | 16 | (a) Give unadjusted estimates and, if applicable, confounder-adjusted estimates and their precision (eg, 95% confidence interval). Make clear which confounders were adjusted for and why they were included | 6-7 |
| 2  |                          |    | (b) Report category boundaries when continuous variables were categorized                                                                                                                                    |     |
| 3  |                          |    | (c) If relevant, consider translating estimates of relative risk into absolute risk for a meaningful time period                                                                                             |     |
| 4  | Other analyses           | 17 | Report other analyses done—eg analyses of subgroups and interactions, and sensitivity analyses                                                                                                               | 6-7 |
| 5  | <b>Discussion</b>        |    |                                                                                                                                                                                                              |     |
| 6  | Key results              | 18 | Summarise key results with reference to study objectives                                                                                                                                                     | 7   |
| 7  | Limitations              | 19 | Discuss limitations of the study, taking into account sources of potential bias or imprecision. Discuss both direction and magnitude of any potential bias                                                   | 2   |
| 8  | Interpretation           | 20 | Give a cautious overall interpretation of results considering objectives, limitations, multiplicity of analyses, results from similar studies, and other relevant evidence                                   | 7-9 |
| 9  | Generalisability         | 21 | Discuss the generalisability (external validity) of the study results                                                                                                                                        | 7-9 |
| 10 | <b>Other information</b> |    |                                                                                                                                                                                                              |     |
| 11 | Funding                  | 22 | Give the source of funding and the role of the funders for the present study and, if applicable, for the original study on which the present article is based                                                | 10  |

\*Give information separately for exposed and unexposed groups.

**Note:** An Explanation and Elaboration article discusses each checklist item and gives methodological background and published examples of transparent reporting. The STROBE checklist is best used in conjunction with this article (freely available on the Web sites of PLoS Medicine at <http://www.plosmedicine.org/>, Annals of Internal Medicine at <http://www.annals.org/>, and Epidemiology at <http://www.epidem.com/>). Information on the STROBE Initiative is available at <http://www.strobe-statement.org>.

# BMJ Open

## DESCRIPTIVE STUDY OF SICKNESS ABSENCE IN SPAIN REGIONS IN 2018

|                                 |                                                                                                                                                                                                                                                                                                                                                                                                                                                                                                             |
|---------------------------------|-------------------------------------------------------------------------------------------------------------------------------------------------------------------------------------------------------------------------------------------------------------------------------------------------------------------------------------------------------------------------------------------------------------------------------------------------------------------------------------------------------------|
| Journal:                        | <i>BMJ Open</i>                                                                                                                                                                                                                                                                                                                                                                                                                                                                                             |
| Manuscript ID                   | bmjopen-2020-038239.R3                                                                                                                                                                                                                                                                                                                                                                                                                                                                                      |
| Article Type:                   | Original research                                                                                                                                                                                                                                                                                                                                                                                                                                                                                           |
| Date Submitted by the Author:   | 23-Sep-2020                                                                                                                                                                                                                                                                                                                                                                                                                                                                                                 |
| Complete List of Authors:       | Alba- Jurado, Matilde-Leonor; National Institute of Social Security, Medical Unit<br>Aguado, María-José; Chief Medical Inspector. , Director of Coordination of Medical Units. National Institute of Social Security.<br>Moreno-Morales, Noelia; University of Malaga Faculty of Health Sciences, Physiotherapy<br>Labajos-Manzanares, Maria Teresa; University of Malaga Faculty of Health Sciences, Physiotherapy<br>Martín-Valero, Rocío; University of Malaga Faculty of Health Sciences, Physiotherapy |
| <b>Primary Subject Heading</b>: | Occupational and environmental medicine                                                                                                                                                                                                                                                                                                                                                                                                                                                                     |
| Secondary Subject Heading:      | Public health                                                                                                                                                                                                                                                                                                                                                                                                                                                                                               |
| Keywords:                       | PREVENTIVE MEDICINE, PUBLIC HEALTH, OCCUPATIONAL & INDUSTRIAL MEDICINE                                                                                                                                                                                                                                                                                                                                                                                                                                      |
|                                 |                                                                                                                                                                                                                                                                                                                                                                                                                                                                                                             |

SCHOLARONE™  
Manuscripts



I, the Submitting Author has the right to grant and does grant on behalf of all authors of the Work (as defined in the below author licence), an exclusive licence and/or a non-exclusive licence for contributions from authors who are: i) UK Crown employees; ii) where BMJ has agreed a CC-BY licence shall apply, and/or iii) in accordance with the terms applicable for US Federal Government officers or employees acting as part of their official duties; on a worldwide, perpetual, irrevocable, royalty-free basis to BMJ Publishing Group Ltd ("BMJ") its licensees and where the relevant Journal is co-owned by BMJ to the co-owners of the Journal, to publish the Work in this journal and any other BMJ products and to exploit all rights, as set out in our [licence](#).

The Submitting Author accepts and understands that any supply made under these terms is made by BMJ to the Submitting Author unless you are acting as an employee on behalf of your employer or a postgraduate student of an affiliated institution which is paying any applicable article publishing charge ("APC") for Open Access articles. Where the Submitting Author wishes to make the Work available on an Open Access basis (and intends to pay the relevant APC), the terms of reuse of such Open Access shall be governed by a Creative Commons licence – details of these licences and which [Creative Commons](#) licence will apply to this Work are set out in our licence referred to above.

Other than as permitted in any relevant BMJ Author's Self Archiving Policies, I confirm this Work has not been accepted for publication elsewhere, is not being considered for publication elsewhere and does not duplicate material already published. I confirm all authors consent to publication of this Work and authorise the granting of this licence.

1  
2  
3 **TITLE PAGE**

4  
5 **TITLE:** DESCRIPTIVE STUDY OF SICKNESS ABSENCE IN SPAIN REGIONS IN  
6 2018

7  
8 **AUTHORS:** Matilde-Leonor Alba-Jurado<sup>1</sup>, María-José Aguado-Benedí<sup>2</sup>, Noelia  
9  
10 Moreno-Morales<sup>3</sup>, María-Teresa Labajos-Manzanares<sup>3</sup>, Rocío Martín-Valero<sup>3\*</sup>

11  
12  
13 \*CORRESPONDENCE AUTHOR: [rovalemas@gmail.com](mailto:rovalemas@gmail.com)

14  
15 <sup>1</sup>Medical Inspector. Medical Unit. National Institute of Social Security. Kandinsky 12  
16  
17 Bajo, 2010 Málaga, Spain. Email: [matilde-leonor.alba@seg-social.es](mailto:matilde-leonor.alba@seg-social.es)

18  
19  
20 <sup>2</sup>Chief Medical Inspector. General Deputy Director of Coordination of Medical Units.  
21  
22 National Institute of Social Security. Padre Damian 4-6, 6º, 28036, Madrid, Spain.

23  
24  
25 Associate professor of Department of Legal Medicine, Pathology, and Psychiatry.  
26  
27 Complutense University of Madrid. Spain.

28  
29  
30 <sup>3</sup>University Professor of Department of Physiotherapy, Faculty of Health Sciences,  
31  
32 University of Malaga, Arquitecto Francisco Peñalosa 3, Ampliación de Campus de  
33  
34 Teatinos, 29071 Malaga, Spain

35  
36  
37 WORD COUNT: 3598 words

38  
39  
40 40 References

41  
42  
43 5 Tables

44  
45  
46  
47 **KEYWORDS:**SICKNESS ABSENCE, SICK LEAVE, OCCUPATIONAL HEALTH,  
48  
49 PROFESSIONAL ILLNESS, OCCUPATIONAL ACCIDENT

50  
51  
52 **Orcid ids:** Matilde-Leonor Alba-Jurado <https://orcid.org/0000-0002-3640-1047>

53  
54  
55 Noelia Moreno Morales <https://orcid.org/0000-0001-5907-9735>

56  
57  
58 María Teresa Labajos Manzanaraes <https://orcid.org/0000-0002-3911-4406>

59  
60 Rocío Martín Valero <http://orcid.org/0000-0002-1664-3647>

61  
62  
63 María José Aguado Benedí <https://orcid.org/0000-0002-3049-166X>

1  
2  
3 1 **TITLE: DESCRIPTIVE STUDY OF SICKNESS ABSENCE IN SPAIN REGIONS IN**  
4 2 **2018**

5  
6 3 **ABSTRACT**

7  
8 4 **Objectives:** To provide a wide and thorough description of sickness absence (SA) in  
9 5 Spain, focusing on the different regions of the country and the main characteristics of  
10 6 SA.

11  
12 7 **Methods:** A study of the SA spells in Spain, managed by the medical units of the  
13 8 National Institute of Social Security in 2018. The geographical scope of this  
14 9 observational study is the Autonomous Community. Incidence, prevalence, and average  
15 10 duration SA in employees and self-employed are described. The study also describes the  
16 11 differences between non-work-related SA and work-related SA. In age and sex  
17 12 variables, the incidence and the average duration are described. The average duration by  
18 13 Diagnostic Chapters (ICD-10) and the highest number of SA spells by occupational  
19 14 activity and diagnosis are analysed.

20  
21  
22 15 **Results:** A total of 540,045 SA spells are analysed by non-work-related SA and 63,441  
23 16 by work-related SA. The national average prevalence in non-work-related SA spells is  
24 17 32.98/1000 among employed and 30.48/1000 among self-employed; in work-related SA  
25 18 spells, the prevalence is 3.99/1000. The national incidence in non-work-related SA  
26 19 spells is 24.8/1000 for employees and 9.51/1000 for self-employed workers; in work-  
27 20 related SA spells the incidence is 3.55/1000. The average duration is 58.67 days, with  
28 21 the longest duration being neoplasms and the shortest corresponding to infectious  
29 22 disease. The Community of Madrid shows the lowest prevalence, incidence, and  
30 23 average duration in work-related SA. Influenza is the diagnosis that generates the  
31 24 largest number of SA spells. Activities of call centres and Temporary employment  
32 25 agency activities are the occupations that have the highest number of SA spells.

33  
34  
35 26 **Conclusions:** The biggest differences are found in the incidence and average duration,  
36 27 between the non-work-related SA spells and work-related SA. If those characteristics of  
37 28 the SA in which a region is more in deficit are known, it will be possible to do better  
38 29 management of the SA.

1  
2  
3  
4  
5  
6  
7  
8  
9  
10  
11  
12  
13  
14  
15  
16  
17  
18  
19  
20  
21  
22  
23  
24  
25  
26  
27  
28  
29  
30  
31  
32  
33  
34  
35  
36  
37  
38  
39  
40  
41  
42  
43  
44  
45  
46  
47  
48  
49  
50  
51  
52  
53  
54  
55  
56  
57  
58  
59  
601  
2  
3  
4  
5  
6  
7  
8  
9  
10  
11  
12  
13  
14  
15  
16  
17  
18  
19  
20  
21  
22  
23  
24  
25  
26  
27  
28  
29  
30  
31  
32  
33

## STRENGTHS AND LIMITATIONS OF THIS STUDY

- The greatest strength of this study is the broad representativeness of its data.
- The data used are at a national level, which allows a great perspective of SA in Spain.
- In this study, it has not always been possible to compare the data between employed and self-employed workers.
- It has not always been possible to distinguish in this study between non-work-related and work-related in all SA spells
- SA spells lasting less than 4 days has not been included in this study.

For peer review only



## 1 INTRODUCTION

2 Sickness absence (SA) is one of the benefits of Social Security, included in article 169  
3 of the Consolidated Text of the General Law of Social Security, RDL 8/2015 of October  
4 30<sup>th</sup>. It comprises benefits in kind (medical assistance) and monetary compensations  
5 (benefits for SA). In Spain, there is a distinction between non-work-related sickness  
6 absence (common disease and non-occupational accident) and work-related sickness  
7 absence (professional illness and occupational accident). The differences between one  
8 group and the other can be seen both in the economic amount of the benefits due to sick  
9 leave and in the social security contributions. To be entitled to this subsidy, there must  
10 be the medical examination and SA is certified by the family practitioner from the State  
11 Health Services, in case of common disease and non-occupational accident. If it is  
12 caused by occupational accidents or professional illness, this sick leave is certified by  
13 physicians ascribed to Insurance Companies linked to the Social Security system.  
14 Maximum duration of sick leave is 365 days, which can be extended for another 180  
15 days if recovery and return of the worker to workplace are expected at that time. If the  
16 duration of sickness benefits has expired and the person's state of health has not  
17 improved enough to return to work, the worker may receive a disability pension. The  
18 maximum duration of SA benefits is similar to other countries nearby such as Germany,  
19 Belgium, or Austria. However, there are considerable differences in all EU countries in  
20 terms of the amount of the payment and the requirements for receiving these benefits<sup>1</sup>.

21 Concerning the rest of the countries of the Organisation for Economic Co-operation and  
22 Development (OECD), Spain is in an intermediate position regarding the SA days per  
23 worker/year. Mexico is in the highest position with 27.7 days, whereas Chile, in the  
24 lowest position, has 7.3 days. Spain has an average of 10.3 days, which is similar to the  
25 level of Austria and the Netherlands (10 days)  
26 (<https://stats.oecd.org/index.aspx?queryid=30123>)

27 Like most European countries, Spain's public sickness insurance spending is a major  
28 component of its social security system<sup>1</sup>. The total financial cost of SA in consolidated  
29 Social Security budgets for 2019 in Spain reached 11,554,711.16 euros, which is 8.89%  
30 of the general Social Security budget<sup>2</sup>. Besides, the importance of SA caused by disease  
31 or accident is not only determined by the social and financial costs that each State  
32 dedicates to it<sup>3</sup>, but also by the resources that employers assign to it<sup>4</sup>, as well as the  
33 productivity losses<sup>5</sup> and the deterioration of these workers' health<sup>6</sup>. It has been reported  
34 that work absenteeism due to illness is, in itself, a risk factor to fall sick, new periods of  
35 SA, unemployment, permanent disability pension<sup>6-8</sup>, social exclusion<sup>9</sup> and death<sup>10,11,12</sup>.  
36 Long SA periods generate both an early retirement from the job market, a slower salary  
37 increase, and an impoverishment of household wealth<sup>6,7-9</sup>.

38 Spain is divided into 17 regions. In each region there are significant differences in  
39 education, economic situation, unemployment rate, and public health system. By sex,  
40 the percentage of men and women is balanced. The number of women is slightly higher,  
41 although the number of working men is still higher. By age, the regions with the  
42 youngest population are mainly those on the Mediterranean coast and also Castile la  
43 Mancha, Extremadura, and the Community of Madrid. The northwestern regions are  
44 more aged.

1  
2  
3 1 In 2017 the working population rate in Spain was 59.41%. The regions with the highest  
4 2 rates of active population were the Canary Islands, the Balearic Islands, the Community  
5 3 of Madrid and Catalonia, and those with the lowest rates were the Cantabrian, Western  
6 4 and Central regions. Service sector was the majority of the workforce (76%) in the  
7 5 islands, the Community of Madrid and Andalusia. Industry was the predominant sector  
8 6 in Navarre, the Basque Country and La Rioja; construction in Castile La Mancha; and  
9 7 agriculture and farming in Murcia (<http://uvadoc.uva.es/handle/10324/26416>)

12 8 These factors affect the behaviour of SA and their management in very different ways.  
13 9 It is important to know the differences to act accordingly.

15 10 Despite its relevance to public policies, there are few studies at the national level that  
16 11 describe the current situation of such benefits in our country; to date, the studies found  
17 12 in the literature related to this topic describe it partially<sup>13</sup>, in some provinces or specific  
18 13 areas<sup>14</sup>, about some specific diseases<sup>15</sup> or specific groups of workers<sup>16</sup>. The used data  
19 14 are national, representing the whole of the workers in Spain. It is a comprehensive and  
20 15 representative study of the total of SA spells in our country in 2018.

23 16 The general objective of this study is to provide a wide description of SA in Spain,  
24 17 focusing on the different regions of the country and according to the main  
25 18 characteristics of SA and differences between regions.

27 19 The specific objectives would be the description of the incidence, prevalence, and  
28 20 average duration of SA; the description of the average duration and incidence rate about  
29 21 age and sex, as well as the average duration of SA by Diagnostic Chapters following the  
30 22 ICD-10. The main occupational activities in which there are more workers with SA  
31 23 spells and the main diseases that cause more SA spells.

## 34 24 **MATERIAL AND METHODS**

35 25 This study is carried out using the statistical databases provided by the Spanish Institute of  
36 26 Social Security (INSS), which are published on the website of this organisation ([www.seg-social.es/wps/portal/wss/internet/EstadisticasPresupuestosEstudios/](http://www.seg-social.es/wps/portal/wss/internet/EstadisticasPresupuestosEstudios/)), and databases obtained  
37 27 from specific programs used by the Medical Units.  
38 28

39 29 The reference population is formed by all the workers in Spain covered by the Social Security  
40 30 system in the year 2018. The study excludes the SA cases of civil workers, Armed Forces  
41 31 personnel, and workers of the General Judicial Benefit Society, whose control and management  
42 32 are not an object of study. SA spells with a duration of fewer than 4 days are not included,  
43 33 because they do not obtain economic benefits from the Social Security system in Spain. Our  
44 34 study does not include unemployed workers, because they do not receive SA benefits

45 35 In Spain, our system of social security is contributory. To this end, both the worker and  
46 36 the company contribute to the system every month a sum of money (contribution) so  
47 37 that the worker can obtain benefits in case of illness or accident. If the worker is self-  
48 38 employed, it is himself who makes these economic contributions exclusively for non-  
49 39 work-related SA. This self-employed person also can pay voluntarily an extra amount  
50 40 for work-related SA to obtain benefits if he or she has a professional illness or an  
51 41 occupational accident.

1  
2  
3 1 Our database does not distinguish between employed and self-employed workers in the  
4 2 case of work-related SA. However, in non-work-related SA such division is made  
5 3 (Table 1)

6  
7 4 Sample: the 2018 total SA records of the Spanish National Institute of Social Security (INSS) is  
8 5 used, which coincide with the total population studied.

9  
10 6 The variables used were: age (in ranges), sex, average SA duration, diagnosis and diagnostic  
11 7 group (International Classification of Diseases, ICD-10), employee or self-employed, non-  
12 8 work-related SA (common disease non-occupational accident) or work-related SA (occupational  
13 9 accident and professional illness), and occupations with higher SA ranking according to the  
14 10 International Standard Industrial Classification of all Economic Activities (ISIC Rev-4).

15  
16  
17 11 The geographical scope of the study is the regions of Spain.

18  
19 12 This is an observational study. The statistical calculations used to refer to all the people  
20 13 affiliated with the system who are entitled to receive the SA benefit (AFI), calculated according  
21 14 to the data provided by the Public Employment Service, the General Treasury of Social  
22 15 Security, INSS and the Social Institute of the Navy.

23  
24 16 Incidence: the ratio that calculates the number of SA (MP2R) per 1000 affiliates. To compute  
25 17 the SA, the number of real registrations for the benefit (MP2R) is used. Monthly datum:  
26 18  $MP2R * 1000 / AFI$ . Accumulated datum: average  $(MP2R) * 1000 / AFI$

27  
28 19 Prevalence: the ratio that calculates the number of SA processes in force per 1000 affiliates. To  
29 20 compute the processes in force, the number of perceivers at the end of the period (MP4) is used.  
30 21 Monthly datum:  $MP4 * 1000 / AFI$ . Accumulated datum: average  $(MP4) * 1000 / AFI$

31  
32 22 The mean general duration is the average of all durations per year. The mean duration per age  
33 23 range and sex were calculated by dividing the number of days in SA by the number of workers  
34 24 in SA in that range. It is also described the number of workers in SA per 1000 affiliates. The  
35 25 median for the average duration per diagnostic chapter is calculated, using the statistics software  
36 26 Excel®.

## 37 27 **Patient and public involvement**

38  
39 28 Anonymised patient data are used in this study. Patients and members of the public are not  
40 29 involved in the conducting of the study.

## 41 30 **RESULTS**

42  
43  
44 31 A total of 540,045 non-work-related SA spells and 63,441 work-related SA spells is analysed,  
45 32 which are those controlled by the Medical Units of the Spanish National Institute of Social  
46 33 Security. There is a total of 16,373,239 workers affiliated to social security.

47  
48  
49 34 The age of the study participants is 16 to 70 years old, both men and women. All are included in  
50 35 all the variables studied (non-work-related, work-related, employed, self-employed, sex, age,  
51 36 diagnosis, and occupational activities). Follow-up time is one year (2018).

52  
53 37 Our results are:

### 54 38 ***SA Prevalence***

55  
56  
57 39 The prevalence of non-work-related SA is 32,68/1000, among employed and 30,48/1000  
58 40 among self-employed. Prevalence of work-related is 3,99/1000. In the non-work-related, it  
59 41 ranges between 27,3 in La Rioja and 40,45 in the Canary Islands in employed persons. In self-

employed, it ranges between 21,5 in the Balearic Islands and 40,63 in the Region of Murcia. In work-related SA, it ranges from 2.73 in the Community of Madrid to 5.51 in Galicia (Table 1).

### ***SA incidence***

Incidence of non-work-related was 24.87/1000 among employed and 9.51/1000 among self-employed. The incidence of work-related was 3.55/1000. Its values ranged between 12.76 in Extremadura and 36.7 in Catalonia (non-work-related, employed person); for self-employed it ranged between 7.71 in Community of Madrid and 16.46 in Chartered Community of Navarre (non-work-related SA). In work-related SA, it ranged from 2.89 in Madrid to 5.15 in the Balearic Islands (Table 1).

### ***Average SA duration***

The average duration of SA was 58.67 days (in non-work-related SA from 38.81 days among employed to 91.38 days among self-employed) with a median of 48.53 days. In non-work-related SA for employees, it ranged between 24.64 days in Chartered Community of Navarre to 67.53 in Extremadura. For self-employed, it varied between 55.15 days in Navarra to 112.86 days in Extremadura. In work-related SA, it ranged from 30.94 days in the Balearic Islands to 50.14 in Cantabria (Table 1).

### ***SA spells and average duration (age ranges and sex).***

In table 2 the total number of workers on sick leave by age and sex is analyzed. There is a distinction between the absolute number of workers on SA and the number of workers on SA per 1000 affiliated per age group and gender because in Spain, in almost all age groups there are more men than women affiliated to social security. This may result in more absolute numbers of sickness absence for men, although the number of SA is higher for women according to the number of affiliates.

Therefore, the total number of workers in SA by age and sex is higher in men than in women (Table 2). According to age range and sex, the number of affiliates in SA is higher in women, except in Castilla-León, Chartered Community of Navarre and the Basque Country between 16 and 25 years of age, Principality of Asturias and La Rioja between 26 and 35 years and La Rioja in 36-45 and 46-55 years.

The average duration of SA is also higher in women than in men in all the age ranges, except in the Community of Madrid and La Rioja for 16-25 years, and Principality of Asturias, Balearic Islands, Canary Islands, Catalonia and Chartered Community of Navarre in workers over 65 years of age.

In women, the average duration of SA is 58.5 days (minimum 12, maximum 137), with a median of 52 days. In men, the average is 53.08 days (minimum 13, maximum 118), with a median of 44.

### ***Average SA duration (diagnostic chapter)***

The average SA duration, in general, is 56.82 days, with a median of 52.80 days. In all the Autonomous Communities, the longest duration corresponds to neoplasms, followed by heart diseases and mental disorders. The shortest duration corresponds to infectious diseases (Table 3).

### ***SA spells by International Classification Diseases 10 (ICD-10) diagnosis***

1  
2  
3 1 Table 4 describes the main diagnoses that generate the highest numbers of SA spells/1000  
4 2 affiliates/per month. The diagnoses with the highest number of SA were: Influenza, virus not  
5 3 identified, Lower back pain and Non-infective gastroenteritis and colitis, unspecified.

7 4 They highlighted the multiple SA spells per Non-infective gastroenteritis and colitis diagnosis,  
8 5 unspecific on Catalonia, Balearic Islands and Community of Navarre.

#### 6 **SA spells by International Standard Industrial Classification of all Economic Activities** 7 **(ISIC Rev-4)**

13 8 There is an outstanding number of SA spell in General public administration activities, Hospital  
14 9 activities, Retail sale in non-specialized stores with food, beverages or tobacco predominating  
15 10 and General cleaning of buildings (Table 5).

17 11 However, when these cases are analysed by the number of affiliates in each occupational  
18 12 activities, those occupations in which the most SA spells is found are Activities of call centres,  
19 13 Temporary employment agency activities and General public administration activities

#### 21 **DISCUSSION**

23 15 The obtained results confirm many of the findings described by other authors at both the  
24 16 national<sup>17</sup> and international levels<sup>18</sup>.

26 17 The prevalence and incidence are much higher in non-work-related SA than in work-  
27 18 related SA, which is logical, since work-related SA only included the accidents occurred  
28 19 in the workplace, as well as the professional diseases described in the Royal Decree  
29 20 1299/2006 of November 10th, and not all diseases, accidents, and injuries that any  
30 21 worker can suffer from. Conversely, in the case of non-work-related SA all illness and  
31 22 accidents are included.

34 23 When the SA prevalence in each region is analysed, it is observed that there are few  
35 24 regions, such as Aragon and the Community of Madrid, below the national average. By  
36 25 breaking it down into non-work-related SA, the regions that are below the average were  
37 26 Andalusia, Aragon, the Balearic Island, Community of Madrid, La Rioja and Valencian  
38 27 Community, while in work-related SA, Aragon, Catalonia, the Basque Country, the  
39 28 Canary Islands and Community of Madrid stand out below the average. It is difficult to  
40 29 know the reasons for these differences in the prevalence SA. To analyse the possible  
41 30 causes of these differences, it would be necessary to carry out other sorts of studies.

45 31 There are also important differences concerning incidence, with these differences being  
46 32 very marked in some regions. Only Castile and Leon does not reach the national  
47 33 average. In the case of non-work-related SA, Andalusia, Castile, and Leon, Extremadura  
48 34 and Valencian Community are below the national average. In work-related SA, values  
49 35 are very approximate in all regions. The highest value is in the Balearic Islands.

52 36 There is a significant difference in the incidence of SA between the employed and self-  
53 37 employed which was much higher in the former. This is in line with the results obtained  
54 38 in other studies conducted in Spain<sup>4</sup> and at an international level<sup>7,19,20</sup>. The self-  
55 39 employed are only charging for the work they have done. On the other hand, if they are  
56 40 in SA's position, the amount they receive is lower, because it depends on their  
57 41 contributions to the social security system.

1  
2  
3 1 The average duration is shorter in all regions in the case of work-related SA because  
4 2 these SA are managed directly by associated Insurance Companies, whose network of  
5 3 doctors and hospital beds are exclusively for workers who had suffered occupational  
6 4 accidents or professional illness. In the case of non-work-related SA, health care is  
7 5 provided by the Public Health System, where other patients are also treated (children,  
8 6 elderly, non-working patients, etc.) and, therefore, waiting lists were longer and  
9 7 treatments for these patients could be delayed further. Besides, the longest duration is  
10 8 for oncological diseases and mental disorders, the origin of which is usually unrelated to  
11 9 work. This finding is in line with that of other studies at the national<sup>4</sup> and European<sup>19</sup>  
12 10 level. Non-work-related SA showed a longer duration to work-related SA which has  
13 11 remained like this for years<sup>14</sup>. The region that showed the shortest duration as a whole is  
14 12 Navarre, where the health expenditure per inhabitant is also the highest in Spain.  
15 13 Healthcare expenditure is also higher in the Basque Country, however, the duration of  
16 14 the IT is one of the longest in many diagnostic chapters.

17 15 The most noteworthy fact is that the number of days on SA for self-employed workers  
18 16 is twice as much as for employees in all of Spain's regions. In our experience, this can  
19 17 be caused by the fact that self-employed workers do not usually start a process of short-  
20 18 term SA, because cash benefits for SA are paid 30 days after the start of SA and they do  
21 19 not receive cash benefits in short-term SA

22 20 The incidence, prevalence, and average duration increase with age. This occurs in all  
23 21 age ranges except for very young workers (men and women) and those over 65 years  
24 22 old. In young people it can be explained by the fact that they often have low-skilled jobs  
25 23 (they have not yet finished their education). They are often temporary and unstable jobs,  
26 24 and many young people work and study at the same time. This causes a double  
27 25 workload that could contribute to worsening their health. As it can be seen, they are  
28 26 short-term SA, which could indicate a low severity of the pathologies that produce  
29 27 them. In the over-65s the prevalence is very low in all regions. One possible explanation  
30 28 is that the retirement age in Spain is around 65 and the worker who decides to continue  
31 29 working instead of retiring is in good health. However, the duration of these SA is very  
32 30 long, because at this age there is a greater prevalence of serious pathologies (neoplasms,  
33 31 ictus, etc.).

34 32 The differences observed in the number of employees regarding sex are in line with the  
35 33 patterns obtained in other studies, with higher incidence<sup>19</sup> and longer duration<sup>21</sup> in  
36 34 women. There is a sex breach in some European countries (Spain, Ireland, France,  
37 35 Belgium, and United Kingdom) compared to others (Netherlands, Portugal, and  
38 36 Italy)<sup>21,22</sup>. The incidence increases with age, which is in agreement with most studies at  
39 37 the national<sup>4,23</sup> and international<sup>7,18,21,22-24</sup> level, with higher intensity according to the  
40 38 number of affiliates per sex and age range (Table 2). Among the multiple explanations  
41 39 for this fact, it is worth highlighting the following: the double work women usually  
42 40 carry out, i.e., paid work and domestic work, with greater responsibilities for the family  
43 41 (traditional gender role)<sup>22,24</sup>, the different behavior of women toward disease<sup>22</sup>, their  
44 42 greater morbidity related to maternity<sup>25</sup> and more fragile health<sup>26</sup>, as well as their lower  
45 43 commitment to work<sup>22</sup>. Other authors highlight the occupational differences, which  
46 44 could explain more than half of the gender differences<sup>24</sup>, as well as the stress level<sup>24</sup>.  
47 45 However, this gender breach is not constant in the long term in all the European

1 countries<sup>22,21</sup>; in fact, some studies question its existence based on the occupational  
2 level<sup>27</sup> and the stress level<sup>28</sup>.

3 The longest duration by diagnostic chapter is oncological diseases, cardiovascular  
4 diseases, and mental disorders, which is in line with other studies<sup>29-31</sup>. Moreover, this  
5 fact poses a serious problem of public health, given the accelerated increase of chronic  
6 diseases in all the countries around Spain<sup>32</sup>, with the consequent increase in the  
7 incidence and duration of SA and the cost that it implies<sup>4,29</sup>.

8 The diagnosis that generated the largest number of SA cases, after the flu, is lower back  
9 pain. This finding is in line with numerous studies, being, nationally, the main diagnosis  
10 of sick leave due to its high incidence and recurrence rate<sup>33</sup>, as well as the  
11 duration<sup>23,34,35</sup> and economic costs of such SA<sup>35</sup>. This is due to the great prevalence of  
12 such pathology, regardless of whether or not it generates SA cases<sup>33,36</sup>, among other  
13 factors.

14 The Public Administration is in the 1<sup>st</sup>, 2<sup>nd</sup> and 3<sup>rd</sup> positions in the described ranking in  
15 almost all the regions. This can be explained by the difference between workers of the  
16 public sector, who represent a greater number of SA cases than employees in the private  
17 sector, as in other countries<sup>19,37,38</sup>. However, in previous studies carried out in Spain,  
18 the Public Administration did not represent or occupied such an important place in SA  
19 spells, being greatly surpassed by the industrial and construction sectors<sup>16,39</sup>.

20 When the SA spells are analysed by the number of affiliated workers in each  
21 occupational activities, a higher number of them is found in workers in call centres and  
22 temporary employment agencies. These activities have a high level of job instability,  
23 with a high worker turnover and very short-term contracts<sup>40</sup>. This could explain the high  
24 rate of absence in them.

25 One of the occupational activities with the highest number of SA spells is Retail sale in  
26 non-specialized stores with food, beverages or tobacco predominating, but when it is  
27 analyzed by the number of affiliates, this number of SA spells is one of the lowest of all  
28 occupational activities. One possible explanation is that many of these workers are  
29 self-employed and, as mentioned before, in these workers the SA incidence is very low.

### 30 **Conclusion**

31 This study shows the important characteristics of SA in Spain. The most important  
32 differences are found in SA incidence and average duration between the different  
33 regions and non-work-related and work-related SA spells. There are also important  
34 differences in the number of SA spells between different occupational activities.

35 The regions that show the most difference SA are the Chartered Community of Navarre  
36 and the Community of Madrid. It would be interesting to carry out further studies that  
37 analyse the main factors that influence SA in Spain.

38 **Acknowledgments:** We would like to thank the National Institute of Social Security for  
39 helping with the databases.

40 **Contributorship statement:** MLAJ, MJAB, NMM, MTLM, and RMV conceived the  
41 original proposal and drafted the original manuscript. MLAJ, MJAB, NMM, and RMV  
42 contributed to the development and refinement and statistical analysis of the protocol.

1  
2  
3  
4  
5  
6  
7  
8  
9  
10  
11  
12  
13  
14  
15  
16  
17  
18  
19  
20  
21  
22  
23  
24  
25  
26  
27  
28  
29  
30  
31  
32  
33  
34  
35  
36  
37  
38  
39  
40  
41  
42  
43  
44  
45  
46  
47  
48  
49  
50  
51  
52  
53  
54  
55  
56  
57  
58  
59  
60

1 All authors critically appraised the drafted manuscript and made important intellectual  
2 contributions to the writing. All authors have read and approved the final submitted  
3 manuscript.

4 **Funding:** The University of Malaga through a predoctoral grant supports MLAJ, 900004852  
5 a Ph.D. student at the University.

6 **Conflicts of Interest:** All the authors declare that they have no conflict of interest.

7 **Patient consent for publication** Not required

8 **Data sharing statement:** All data relevant to the study are included in the article. Data  
9 are available in a public, open-access repository:

10 [www.seg-social.es/wps/portal/wss/internet/EstadisticasPresupuestosEstudios/](http://www.seg-social.es/wps/portal/wss/internet/EstadisticasPresupuestosEstudios/)

## 11 **KEY MESSAGES**

### 12 **What is already known about this subject?**

- 13 ➤ Sickness absence (SA) is one of the main causes of work absenteeism, loss of  
14 productivity and workers' health, permanent disability, and increased the risk of disease,  
15 unemployment, and death in Spain and nearby countries.
- 16 ➤ Increasing efforts are being made to control SA and early reincorporation of workers  
17 who have suffered a period of SA due to disease or accident.

### 18 **What are the new findings?**

- 19 ➤ To our knowledge, it is the first research about SA spells a national analysis in Spain.
- 20 ➤ There is a much higher incidence of SA in Spain among employees than among self-  
21 employed workers, whereas the average duration is much higher in the latter.
- 22 ➤ There are high numbers of SA spells among workers of the Public Administration in  
23 Spain, workers of call centers and workers of temporary employment agencies.
- 24 ➤ The Chartered Community of Navarre has the highest incidence and the shortest  
25 duration of SA spells.
- 26 ➤ The Community of Madrid has the lowest prevalence, incidence and average duration in  
27 work-related SA spells.

### 28 **How could this affect clinical policies or practices in a predictable future?**

- 29 ➤ This implies the need to increase the effort to know the main factors that influence SA  
30 in Spain, the characteristics of the workers, and the activity they carry out.
- 31 ➤ It is essential to implement a strict control of the diseases with greater incidence and  
32 prevalence, studying the age ranges, sex and the characteristics of the job in which they  
33 are produced, in order to reduce the negative effects on healthcare, social and economic  
34 costs.



## 1 REFERENCES

- 1 2
- 3 1
- 4
- 5 2 1. Spasova, S., Bouget, D., & Vanhercke, B. *Sick pay and sickness benefit schemes in the*
- 6 3 *European Union. Background report for the Social Protection Committee's In-Depth*
- 7 4 *Review on sickness benefits.* (2016). doi:10.2767/531076
- 8
- 9 5 2. Ministerio de Trabajo, M. y S. S. *Presupuestos de la Seguridad Social.* (2019).
- 10
- 11 6 3. Lusinyan, L. & Bonato, L. Work absence in Europe. *IMF Staff Pap.* **54**, 475–538 (2007).
- 12 7 4. Alba-Ramírez, A. La incapacidad temporal para el trabajo: análisis económico de su
- 13 8 incidencia y su duración. *Univ. Carlos III. Madrid* **150**, (2009).
- 14
- 15 9 5. Peña Longobardo, L. M., Aranda Reneo, I., Oliva-Moreno, J. & Vall Castello, J.
- 16 10 Evaluación de las pérdidas laborales provocadas enfermedades y lesiones en España en
- 17 11 el año 2009. *Rev. Evaluación Programas y Políticas Públicas* **1**, 66 (2016).
- 18
- 19 12 6. Helgesson, M., Johansson, B., Nordqvist, T., Lundberg, I. & Vingard, E. Sickness
- 20 13 absence at a young age and later sickness absence, disability pension, death,
- 21 14 unemployment and income in native Swedes and immigrants. *Eur. J. Public Health* **25**,
- 22 15 688–692 (2015).
- 23
- 24 16 7. Virtanen, M. *et al.* Sickness absence as a risk factor for job termination, unemployment,
- 25 17 and disability pension among temporary and permanent employees. *Occup. Environ.*
- 26 18 *Med.* **63**, 212–217 (2006).
- 27
- 28 19 8. Salonen, L., Blomgren, J., Laaksonen, M. & Niemelä, M. Sickness absence as a
- 29 20 predictor of disability retirement in different occupational classes: A register-based study
- 30 21 of a working-age cohort in Finland in 2007-2014. *BMJ Open* **8**, 1–8 (2018).
- 31
- 32 22 9. Bryngelson, A. Long-term sickness absence and social exclusion. *Scand. J. Public*
- 33 23 *Health* **37**, 839–845 (2009).
- 34
- 35 24 10. Ferrie, J. E. *et al.* Diagnosis-specific sickness absence and all-cause mortality in the
- 36 25 GAZEL study. *J. Epidemiol. Community Health* **63**, 50–55 (2009).
- 37
- 38 26 11. Kivimäki, M. *et al.* Sickness absence as a global measure of health: Evidence from
- 39 27 mortality in the Whitehall II prospective cohort study. *Br. Med. J.* **327**, 364–368 (2003).
- 40
- 41 28 12. Gjesdal, S. *et al.* Mortality after long-term sickness absence: Prospective cohort study.
- 42 29 *Eur. J. Public Health* **18**, 517–521 (2008).
- 43
- 44 30 13. Gimeno, D., Benavides, F. G., Benach, J. & Amick, B. C. Distribution of sickness
- 45 31 absence in the European Union countries. *Occup. Environ. Med.* **61**, 867–869 (2004).
- 46
- 47 32 14. Benavides, F. G. *et al.* Evaluación de la gestión de los casos de incapacidad temporal por
- 48 33 contingencia común de más de 15 días en Cataluña. *Gac. Sanit.* **24**, 215–219 (2010).
- 49
- 50 34 15. Vicente-Herrero, M. T., Terradillos García, M. J., Capdevila Garcia, L. M., Ramírez
- 51 35 Iñiguez De La Torre, M. V. & López-González, Á. A. [Sick leaves caused by psychiatric
- 52 36 diseases in Spain during 2011]. *Rev. Med. Chil.* **141**, 248–54 (2013).
- 53
- 54 37 16. Benavides, F.G., Plana, M., Serra, C., Dominguez, R., Despuig, M., Aguirre, S., Soria,
- 55 38 M., Sampere, M., Gimeno, D. Return to Work After a Non-Work Related Sick Spell:
- 56 39 The Role of Age, Sex, Economic Activity and Autonomous Community. *Original* **81**,
- 57 40 183–190 (2007).
- 58
- 59 41 17. Cuesta, M. Tasas de absentismo por enfermedad en Epaña: datos para el periodo 1996-
- 60 42 2004. *Cuad. Econ.* **35**, 1–8 (2012).
- 43 18. Livanos, L. & Zangelidis, A. Sickness Absence: A Pan-European Study. *Munich Pers.*

1  
2  
3  
4  
5  
6  
7  
8  
9  
10  
11  
12  
13  
14  
15  
16  
17  
18  
19  
20  
21  
22  
23  
24  
25  
26  
27  
28  
29  
30  
31  
32  
33  
34  
35  
36  
37  
38  
39  
40  
41  
42  
43  
44  
45  
46  
47  
48  
49  
50  
51  
52  
53  
54  
55  
56  
57  
58  
59  
60

- 1 *RePEc Arch.* (2010).
- 2 19. Rosta, J., Tellnes, G. & Aasland, O. G. Differences in sickness absence between self-  
3 employed and employed doctors: A cross-sectional study on national sample of  
4 Norwegian doctors in 2010. *BMC Health Serv. Res.* **14**, 1–8 (2014).
- 5 20. Alba-Ramírez, A; López-Mourelo, E. Sickness absence from work in Spain: Are there  
6 gender differences? *UC3M Work. Pap.* **15–17**, (2017).
- 7 21. Pekkala, J., Blomgren, J., Pietiläinen, O., Lahelma, E. & Rahkonen, O. Occupational  
8 class differences in long sickness absence: A register-based study of 2.1 million Finnish  
9 women and men in 1996-2013. *BMJ Open* **7**, 1–8 (2017).
- 10 22. Mastekaasa, A. The gender gap in sickness absence: Long-term trends in eight European  
11 countries. *Eur. J. Public Health* **24**, 656–662 (2014).
- 12 23. Álvarez Theurer, E., Llergo Muñoz, A. & Vaquero Abellán, M. Análisis de la duración  
13 de los períodos de incapacidad temporal por procesos en Andalucía. Factores asociados.  
14 *Aten. Primaria* **41**, 387–393 (2009).
- 15 24. Laaksonen, M. *et al.* Gender differences in sickness absence - The contribution of  
16 occupation and workplace. *Scand. J. Work. Environ. Heal.* **36**, 394–403 (2010).
- 17 25. Ariansen, A. M. S. Age, occupational class and sickness absence during pregnancy: A  
18 retrospective analysis study of the norwegian population registry. *BMJ Open* **4**, 1–9  
19 (2014).
- 20 26. Llobet, C. V., Banqué, M., Fuentes, M. & Ojuel, J. Morbilidad diferencial entre mujeres  
21 y hombres. *Anu. Psicol.* **39**, 9–22 (2008).
- 22 27. Løset, G. K. *et al.* Gender equality in sickness absence tolerance: Attitudes and norms of  
23 sickness absence are not different for men and women. *PLoS One* **13**, 1–18 (2018).
- 24 28. Mastekaasa, A. & Melsom, A. M. Occupational segregation and gender differences in  
25 sickness absence : Evidence from 17 European countries Acknowledgement : We are  
26 grateful to the European Commission , Eurostat and to the original collecting agencies  
27 for access to the EU LFS ( 2008 relea.
- 28 29. Ármannsdóttir, B., Mårdby, A. C., Haukenes, I. & Hensing, G. Cumulative incidence of  
29 sickness absence and disease burden among the newly sick-listed, a cross-sectional  
30 population-based study. *BMC Public Health* **13**, (2013).
- 31 30. Zhang, W., McLeod, C. & Koehoorn, M. The relationship between chronic conditions  
32 and absenteeism and associated costs in Canada. *Scand. J. Work. Environ. Heal.* **42**,  
33 413–422 (2016).
- 34 31. Jakovljevic, M., Malmose-Stapelfeldt, C., Milovanovic, O., Rancic, N. & Bokonjic, D.  
35 Disability, Work Absenteeism, Sickness Benefits, and Cancer in Selected European  
36 OECD Countries—Forecasts to 2020. *Front. Public Heal.* **5**, 1–8 (2017).
- 37 32. Nexø, M. A. *et al.* Long-term sickness absence of 32 chronic conditions: A Danish  
38 register-based longitudinal study with up to 17 years of follow-up. *BMJ Open* **8**, 1–10  
39 (2018).
- 40 33. Hestbaek, L., Leboeuf-Yde, C. & Manniche, C. Low back pain: what is the long-term  
41 course? A review of studies of general patient populations. *Eur. Spine J.* **12**, 149–165  
42 (2003).
- 43 34. Steenstra, I. A., Verbeek, J. H., Heymans, M. W. & Bongers, P. M. Prognostic factors  
44 for duration of sick leave in patients sick listed with acute low back pain: A systematic  
45 review of the literature. *Occup. Environ. Med.* **62**, 851–860 (2005).

1  
2  
3  
4  
5  
6  
7  
8  
9  
10  
11  
12  
13  
14  
15  
16  
17  
18  
19  
20  
21  
22  
23  
24  
25  
26  
27  
28  
29  
30  
31  
32  
33  
34  
35  
36  
37  
38  
39  
40  
41  
42  
43  
44  
45  
46  
47  
48  
49  
50  
51  
52  
53  
54  
55  
56  
57  
58  
59  
60

- 1 35. Diaz-Ledezma, C. *et al.* Factors associated with variability in length of sick leave  
2 because of acute low back pain in Chile. *Spine J.* **9**, 1010–1015 (2009).
- 3 36. Crook, J., Milner, R., Schultz, I. Z. & Stringer, B. Determinants of occupational  
4 disability following a low back injury: A critical review of the literature. *Handb.*  
5 *Complex Occup. Disabil. Claims Early Risk Identification, Interv. Prev.* **12**, 169–189  
6 (2005).
- 7 37. Oke, A., Braithwaite, P. & Antai, D. Sickness absence and precarious employment: A  
8 comparative cross-national study of Denmark, Finland, Sweden, and Norway. *Int. J.*  
9 *Occup. Environ. Med.* **7**, 125–147 (2016).
- 10 38. Alexopoulos, E. C. *et al.* Sickness absence in the private sector of Greece: Comparing  
11 shipyard industry and national insurance data. *Int. J. Environ. Res. Public Health* **9**,  
12 1171–1181 (2012).
- 13 39. G. Benavides, F., Zaballa, E., Sanchez-Niubo, A., Gimeno Ruiz de Porras, D. & Duran,  
14 X. Incidence of non-work-related sickness absence in Spain by economic activity of the  
15 company. *Arch. Prev. Riesgos Labor.* **20**, 14–25 (2017).
- 16 40. Micheli Thiri6n, J. Los call centers y los nuevos trabajos del siglo XXI. *Confin. Relac.*  
17 *Int. y Cienc. pol6tica* **3** (2007).

## 21 Table legends

- 22
- 23 Table 1: Prevalence, incidence and average duration of sickness absence in Spain (2018)
- 24 Table 2. Sickness absence and average duration (days), by age and sex
- 25 Table 3. Average duration (days) by diagnostic chapter (ICD-10)
- 26 Table 4. Sickness absence spells by diagnosis (ICD-10)
- 27 Table 5. Sickness absence situations by occupational activities (International Standard Industrial  
28 Classification of all Economic Activities, ISIC Rev-4)

Table 1: Prevalence, incidence and average duration of sickness absence in Spain (2018)

|                                | PREVALENCE          |               |                 | INCIDENCE           |               |                 | AVERAGE DURATION (days) |               |                 |
|--------------------------------|---------------------|---------------|-----------------|---------------------|---------------|-----------------|-------------------------|---------------|-----------------|
|                                | NON-WORK-RELATED SA |               | WORK-RELATED SA | NON-WORK-RELATED SA |               | WORK-RELATED SA | NON-WORK-RELATED SA     |               | WORK-RELATED SA |
|                                | EMPLOYED            | SELF-EMPLOYED |                 | EMPLOYED            | SELF-EMPLOYED |                 | EMPLOYED                | SELF-EMPLOYED |                 |
| ANDALUSIA                      | 29,41               | 31,43         | 4,26            | 19,72               | 9,28          | 3,98            | 44,79                   | 98,35         | 37,24           |
| ARAGON                         | 32,52               | 30,48         | 3,94            | 25,95               | 11,15         | 3,39            | 36,47                   | 75,45         | 41,45           |
| PRINCIPALITY of ASTURIAS       | 36                  | 38,96         | 5,01            | 18,73               | 10,85         | 3,53            | 58,55                   | 105,03        | 47,08           |
| BALEARIC ISLANDS               | 31,29               | 21,7          | 4,72            | 27,02               | 6,46          | 5,15            | 33,02                   | 84,01         | 30,94           |
| CANARY ISLANDS                 | 40,45               | 26,45         | 3,85            | 25,23               | 7,96          | 3,51            | 48,53                   | 100,87        | 38,17           |
| CANTABRIA                      | 39,77               | 38,68         | 4,84            | 23,38               | 10,92         | 3,18            | 51,39                   | 108,36        | 50,14           |
| CASTILE and LEON               | 32,68               | 31,71         | 4,35            | 19,46               | 9,15          | 3,44            | 47,95                   | 95,36         | 42,07           |
| CASTILE LA MANCHA              | 32,4                | 35,57         | 4,48            | 19,91               | 9,93          | 3,96            | 46,02                   | 98,54         | 38,08           |
| CATALONIA                      | 35,14               | 28,76         | 3,8             | 36,37               | 10,17         | 3,6             | 28,54                   | 83,48         | 36,06           |
| EXTREMADURA                    | 31,59               | 38,9          | 4,64            | 12,76               | 8,94          | 3,68            | 67,53                   | 112,86        | 41,42           |
| GALICIA                        | 39,79               | 44,29         | 5,51            | 18,52               | 10,54         | 3,57            | 61,39                   | 111,82        | 49,83           |
| COMMUNITY of MADRID            | 29,17               | 20,79         | 2,73            | 25,54               | 7,71          | 2,89            | 33,89                   | 77,75         | 33,11           |
| MURCIA                         | 35,55               | 40,63         | 4,12            | 20,21               | 11,33         | 3,39            | 48,39                   | 98,49         | 40,2            |
| CHARTERED COMMUNITY of NAVARRA | 35,73               | 30,72         | 4,28            | 43,87               | 16,46         | 3,88            | 24,64                   | 55,15         | 37,86           |
| LA RIOJA                       | 27,3                | 25,65         | 4,41            | 25,28               | 10,91         | 3,91            | 34,53                   | 69,95         | 38,87           |

|                       |       |       |      |       |       |      |       |       |       |
|-----------------------|-------|-------|------|-------|-------|------|-------|-------|-------|
| <b>VALENCIA</b>       | 30,68 | 29,28 | 4,4  | 18,06 | 8,79  | 3,34 | 49,29 | 96,3  | 42,34 |
| <b>BASQUE COUNTRY</b> | 39,58 | 28,3  | 3,84 | 31,15 | 10,52 | 3,96 | 38,16 | 79,6  | 36,55 |
| <b>NATIONAL TOTAL</b> | 32,98 | 30,48 | 3,99 | 24,98 | 9,51  | 3,55 | 38,81 | 91,38 | 38,23 |

For peer review only

Table 2. Sickness absence and average duration (days), by age and sex

|                  | ANDALUSIA                  |            | ARAGON     |           | P. OF ASTURIAS |           | BALEARIC ISLANDS |           | CANARY ISLANDS |            | CANTABRIA  |           | CASTILE AND LEON |            | CASTILE LA MANCHA |           | CATALONIA  |            | EXTREMADURA |           | GALICIA   |            | COMMUNITY OF MADRID |            | REGION OF MURCIA |           | C. C. OF NAVARRE |           | LA RIOJA  |           | VALENCIA  |            | BASQUE COUNTRY |            |            |
|------------------|----------------------------|------------|------------|-----------|----------------|-----------|------------------|-----------|----------------|------------|------------|-----------|------------------|------------|-------------------|-----------|------------|------------|-------------|-----------|-----------|------------|---------------------|------------|------------------|-----------|------------------|-----------|-----------|-----------|-----------|------------|----------------|------------|------------|
|                  | Woman                      | Man        | Woman      | Man       | Woman          | Man       | Woman            | Man       | Woman          | Man        | Woman      | Man       | Woman            | Man        | Woman             | Man       | Woman      | Man        | Woman       | Man       | Woman     | Man        | Woman               | Man        | Woman            | Man       | Woman            | Man       | Woman     | Man       | Woman     | Man        | Woman          | Man        |            |
| 16-25            | Total workforce            | 28.519     | 30.319     | 7.211     | 9.576          | 1.836     | 2.100            | 11.010    | 10.470         | 11.404     | 9.813      | 2.235     | 2.292            | 6.859      | 9.934             | 7.294     | 10.106     | 92.204     | 83.921      | 2.064     | 2.793     | 6.082      | 7.549               | 43.592     | 42.510           | 5.649     | 7.818            | 5.488     | 7.886     | 1.457     | 2.034     | 15.154     | 18.327         | 8.401      | 12.209     |
|                  | Average affiliated workers | 68552.40   | 89.788.42  | 12715.03  | 17.792.34      | 5368.35   | 6.294.17         | 16392.26  | 19.260.69      | 19549.26   | 23.478.52  | 3792.28   | 4.565.60         | 16025.01   | 22.400.00         | 13405.17  | 21.951.23  | 112945.61  | 122.308.48  | 7057.99   | 11.732.44 | 17279.67   | 21.582.01           | 61635.82   | 97.705.09        | 13971.74  | 19.847.78        | 6659.14   | 8.653.16  | 2699.60   | 2.696.28  | 46147.56   | 56.875.39      | 17735.00   | 22.613.08  |
|                  | SA/1000 affiliates         | 34.67      | 28.14      | 47.26     | 44.85          | 28.5      | 27.8             | 55.97     | 45.29          | 48.61      | 34.82      | 49.11     | 41.83            | 35.67      | 36.96             | 45.34     | 38.36      | 68.02      | 57.17       | 24.37     | 19.83     | 29.33      | 29.14               | 44.5       | 36.25            | 33.89     | 32.82            | 68.67     | 75.94     | 44.97     | 45.85     | 27.36      | 26.85          | 39.47      | 44.99      |
|                  | Total days of SA           | 834.572    | 846.610    | 131.509   | 167.205        | 50.471    | 56.482           | 185.291   | 178.221        | 309.354    | 231.868    | 48.036    | 48.391           | 167.468    | 222.267           | 309.354   | 242.410    | 1.358.613  | 1.249.511   | 94.375    | 105.025   | 231.248    | 264.978             | 659.008    | 707.760          | 189.971   | 225.126          | 70.415    | 105.159   | 26.249    | 38.326    | 434.028    | 500.328        | 170.994    | 232.766    |
| Average duration | 29                         | 27         | 18         | 17        | 27             | 26        | 16               | 17        | 27             | 23         | 21         | 21        | 24               | 22         | 42                | 23        | 14         | 14         | 45          | 37        | 38        | 35         | 15                  | 16         | 33               | 28        | 12               | 13        | 18        | 18        | 28        | 27         | 20             | 19         |            |
| 26-35            | Total workforce            | 100.686    | 86.518     | 20.411    | 20.921         | 7.876     | 8.438            | 22.333    | 19.262         | 32.182     | 25.520     | 7.126     | 6.214            | 23.829     | 23.851            | 22.958    | 23.179     | 195.844    | 166.163     | 8.168     | 6.905     | 25.440     | 23.811              | 126.980    | 102.745          | 19.347    | 18.506           | 5.488     | 7.886     | 1.457     | 2.034     | 15.154     | 18.327         | 8.401      | 12.209     |
|                  | Average affiliated workers | 300.358.69 | 330.969.33 | 48.943.45 | 55.044.50      | 29.131.98 | 30.748.08        | 51.679.23 | 54.743.11      | 80.321.79  | 82.314.91  | 18.686.80 | 19.468.05        | 73.916.47  | 83.188.54         | 59.795.11 | 75.578.35  | 310.001.82 | 347.500.15  | 36.076.74 | 41.472.33 | 88.778.42  | 92.930.24           | 334.003.39 | 351.427.98       | 53.485.35 | 64.162.37        | 23.761.08 | 27.464.21 | 11.184.28 | 11.558.26 | 169.672.13 | 189.654.50     | 72.276.88  | 83.896.41  |
|                  | SA/1000 affiliates         | 27.93      | 21.78      | 34.75     | 31.67          | 22.53     | 22.87            | 36.01     | 29.32          | 33.39      | 25.84      | 31.78     | 26.60            | 26.86      | 23.89             | 32.00     | 25.55      | 52.65      | 39.85       | 18.87     | 13.87     | 23.88      | 21.35               | 31.68      | 24.36            | 30.14     | 24.04            | 52.48     | 51.62     | 33.13     | 36.82     | 24.45      | 19.81          | 37.83      | 34.70      |
|                  | Total days of SA           | 4.002.601  | 2.741.036  | 613.970   | 475.288        | 326.129   | 321.994          | 596.265   | 434.597        | 1.290.175  | 833.828    | 282.294   | 203.621          | 918.856    | 733.947           | 927.034   | 686.484    | 4.915.171  | 3.405.555   | 475.765   | 307.251   | 1.289.570  | 1.018.756           | 3.636.681  | 2.344.947        | 882.767   | 621.458          | 325.739   | 275.255   | 127.536   | 108.671   | 2.207.518  | 1.512.322      | 1.228.249  | 647.290    |
| Average duration | 39                         | 31         | 30         | 22        | 41             | 38        | 26               | 22        | 40             | 32         | 39         | 32        | 38               | 30         | 40                | 29        | 25         | 20         | 58          | 44        | 50        | 42         | 28                  | 22         | 45               | 33        | 21               | 16        | 28        | 21        | 44        | 33         | 35             | 24         |            |
| 36-45            | Total workforce            | 118.614    | 117.512    | 25.565    | 26.492         | 13.494    | 14.020           | 23.709    | 22.637         | 40.199     | 35.601     | 10.016    | 9.757            | 31.594     | 32.035            | 26.742    | 29.050     | 221.680    | 205.633     | 9.621     | 9.250     | 38.674     | 35.964              | 151.187    | 125.041          | 23.103    | 24.813           | 20.685    | 22.630    | 5.864     | 6.555     | 63.233     | 65.615         | 51.452     | 55.641     |
|                  | Average affiliated workers | 416.547.17 | 493.349.53 | 73.820.89 | 88.587.25      | 53.033.04 | 57.508.87        | 72.634.45 | 79.189.07      | 113.319.60 | 124.332.39 | 31.436.56 | 34.354.87        | 116.512.04 | 134.105.28        | 85.921.38 | 117.415.38 | 467.172.39 | 536.140.86  | 51.846.68 | 57.864.40 | 154.779.30 | 159.073.44          | 448.746.41 | 492.003.79       | 74.900.72 | 103.493.33       | 37.428.06 | 44.884.12 | 18.530.51 | 19.654.64 | 256.013.07 | 308.714.88     | 131.005.73 | 147.561.07 |
|                  | SA/1000 affiliates         | 23.73      | 19.85      | 28.86     | 24.92          | 21.20     | 20.32            | 27.20     | 23.82          | 29.56      | 23.86      | 26.55     | 23.67            | 22.60      | 19.91             | 25.94     | 20.82      | 39.54      | 31.96       | 15.46     | 13.32     | 20.82      | 18.84               | 28.08      | 21.18            | 25.70     | 19.98            | 46.06     | 42.02     | 26.37     | 27.79     | 20.58      | 17.71          | 32.73      | 31.42      |
|                  | Total days of SA           | 5485098    | 4853604    | 1017787   | 884342         | 729537    | 710147           | 871595    | 690262         | 1984219    | 1537765    | 522327    | 427368           | 1601141    | 1341221           | 1320806   | 1180792    | 7299940    | 5952905     | 684002    | 523399    | 2405243    | 1925240             | 5625202    | 4022176          | 1271496   | 1132594          | 584891    | 515533    | 216891    | 196201    | 3345778    | 2905621        | 2137768    | 1898819    |
| Average duration | 46                         | 41         | 39         | 33        | 54             | 50        | 36               | 30        | 49             | 43         | 52         | 43        | 50               | 41         | 49                | 40        | 32         | 28         | 71          | 56        | 62        | 53         | 37                  | 32         | 55               | 45        | 28               | 22        | 36        | 29        | 52        | 44         | 41             | 34         |            |
| 46-55            | Total workforce            | 93419      | 97446      | 20531     | 21134          | 12107     | 11379            | 19560     | 18340          | 33484      | 32340      | 7739      | 7993             | 27137      | 28786             | 20740     | 24528      | 161373     | 145283      | 9133      | 9654      | 32304      | 30656               | 116428     | 97152            | 17870     | 19928            | 17679     | 17432     | 4652      | 5523      | 52477      | 56490          | 44669      | 47083      |
|                  | Average affiliated workers | 376667.85  | 452781.53  | 72642.41  | 86832.17       | 50430.1   | 54182.72         | 59519.62  | 70647.25       | 103329.08  | 124900.1   | 27966.17  | 32274.09         | 121691.32  | 144244.47         | 78676.23  | 113500.26  | 420095.39  | 483766.12   | 48995.11  | 61304.89  | 155675.61  | 146483              | 392653.45  | 435113.09        | 63760.45  | 88653.91         | 36669.67  | 43790.26  | 16865.87  | 19151.91  | 227708.97  | 286020.66      | 132334.79  | 149918.57  |
|                  | SA/1000 affiliates         | 20.67      | 17.93      | 23.55     | 20.28          | 20.01     | 17.50            | 27.39     | 21.63          | 27.00      | 21.58      | 23.06     | 20.64            | 18.58      | 16.63             | 21.97     | 18.01      | 32.01      | 25.03       | 15.55     | 13.12     | 17.29      | 17.44               | 24.71      | 18.61            | 23.36     | 18.73            | 40.18     | 33.17     | 22.99     | 24.03     | 19.20      | 16.46          | 28.13      | 26.17      |
|                  | Total days of SA           | 5669205    | 5761219    | 1161473   | 1084204        | 892531    | 800712           | 986970    | 817858         | 2095638    | 1869968    | 514677    | 492931           | 1843156    | 1685686           | 1339820   | 1442138    | 7170290    | 6146120     | 756791    | 756088    | 2592300    | 2196003             | 5597323    | 4348939          | 1266827   | 1234944          | 690509    | 631566    | 226762    | 248332    | 3621543    | 3415316        | 2402084    | 2300411    |
| Average duration | 60                         | 59         | 56         | 50        | 73             | 70        | 50               | 44        | 62             | 57         | 66         | 61        | 67               | 58         | 64                | 58        | 44         | 42         | 82          | 78        | 80        | 71         | 48                  | 44         | 70               | 61        | 39               | 36        | 48        | 44        | 69        | 60         | 53             | 48         |            |
| 56-65            | Total workforce            | 54794      | 55337      | 13132     | 12022          | 9140      | 7504             | 11512     | 9850           | 16303      | 15530      | 5491      | 5206             | 18430      | 19782             | 11693     | 14709      | 85972      | 74294       | 6060      | 6574      | 22907      | 19711               | 67732      | 53708            | 11580     | 11798            | 9312      | 8423      | 2931      | 3133      | 33820      | 33628          | 28812      | 26181      |
|                  | Average affiliated workers | 225629.08  | 261355.04  | 45478.18  | 56875.03       | 34528.21  | 37293.19         | 34180.32  | 40291.24       | 48415.01   | 64110.82   | 18313.97  | 22216.8          | 81337.65   | 106472.69         | 44685.46  | 72066.5    | 237960.81  | 279504.05   | 30888.53  | 42159.4   | 87344.91   | 92663.59            | 217723.25  | 240497.55        | 35155.93  | 48115.93         | 21505.51  | 26507.11  | 10467.84  | 13056.28  | 128808.03  | 166094.89      | 82120.99   | 95280.63   |
|                  | SA/1000 affiliates         | 20.24      | 17.64      | 24.06     | 17.61          | 22.06     | 16.77            | 28.07     | 20.37          | 28.06      | 20.19      | 24.99     | 19.53            | 18.88      | 15.48             | 21.81     | 17.01      | 30.11      | 22.15       | 16.35     | 12.99     | 21.85      | 17.73               | 25.93      | 18.61            | 27.45     | 20.43            | 36.08     | 26.48     | 23.33     | 20.00     | 21.88      | 16.87          | 29.24      | 22.90      |
|                  | Total days of SA           | 4016323    | 4392212    | 954029    | 886164         | 799503    | 654003           | 722340    | 644055         | 1270661    | 1239034    | 458470    | 446106           | 1611454    | 1563351           | 971777    | 1205977    | 5269955    | 4690436     | 567570    | 631405    | 2297445    | 1810405             | 4144067    | 3305759          | 1026123   | 969808           | 478852    | 457600    | 200637    | 200286    | 2884959    | 2773183        | 2023474    | 1882291    |
| Average duration | 73                         | 79         | 72         | 73        | 87             | 87        | 62               | 65        | 77             | 79         | 83         | 85        | 87               | 79         | 83                | 81        | 61         | 63         | 95          | 96        | 100       | 91         | 61                  | 61         | 88               | 82        | 51               | 54        | 68        | 63        | 85        | 82         | 70             | 71         |            |

|                            |          |          |         |         |         |         |         |         |       |         |         |        |         |         |         |         |          |          |         |         |         |        |          |          |         |         |        |         |        |        |         |         |         |         |
|----------------------------|----------|----------|---------|---------|---------|---------|---------|---------|-------|---------|---------|--------|---------|---------|---------|---------|----------|----------|---------|---------|---------|--------|----------|----------|---------|---------|--------|---------|--------|--------|---------|---------|---------|---------|
| Total workforce            | 1009     | 912      | 218     | 229     | 143     | 135     | 248     | 248     | 405   | 507     | 93      | 90     | 309     | 369     | 222     | 243     | 1499     | 1783     | 109     | 118     | 496     | 416    | 1427     | 1472     | 209     | 205     | 97     | 99      | 48     | 53     | 565     | 586     | 395     | 395     |
| Average affiliated workers | 11950.42 | 13802.04 | 2562.05 | 3147.87 | 2035.13 | 1864.38 | 2749.35 | 3794.28 | 3761  | 6238.89 | 1063.87 | 1151.9 | 4800.68 | 6608.46 | 2729.33 | 3896.45 | 16654.52 | 21595.24 | 1635.76 | 2118.84 | 6019.34 | 6010.7 | 14815.19 | 17812.54 | 2137.48 | 2850.03 | 976.63 | 1251.16 | 558.86 | 884.86 | 7419.14 | 9562.67 | 3943.04 | 4299.16 |
| SA/1000 affiliates         | 7.04     | 5.51     | 7.09    | 6.06    | 5.86    | 6.03    | 7.52    | 5.45    | 8.97  | 6.77    | 7.28    | 6.51   | 5.36    | 4.65    | 6.78    | 5.20    | 7.50     | 6.88     | 5.55    | 4.64    | 6.87    | 5.77   | 8.03     | 6.89     | 8.15    | 5.99    | 8.28   | 6.59    | 7.16   | 4.99   | 6.35    | 5.11    | 8.35    | 7.66    |
| Total days of SA           | 102994   | 86720    | 22938   | 20767   | 14254   | 15093   | 19474   | 21387   | 42070 | 54105   | 9941    | 8986   | 33554   | 36135   | 30606   | 23582   | 137904   | 164426   | 14652   | 13172   | 60119   | 49220  | 115468   | 116354   | 28423   | 19951   | 7095   | 8826    | 5266   | 4674   | 63313   | 59850   | 38371   | 34999   |
| Average duration           | 102      | 95       | 105     | 90      | 99      | 111     | 78      | 86      | 103   | 106     | 106     | 99     | 108     | 97      | 137     | 97      | 91       | 92       | 134     | 111     | 121     | 118    | 80       | 79       | 135     | 97      | 73     | 89      | 109    | 88     | 112     | 102     | 97      | 88      |

Table 3. Average duration (days) by diagnostic chapter (ICD-10)

| DIAGNOSIS CHAPTER (I)                                                                                          | ANDALUSIA | ARAGON | P. OF ASTURIAS | BALEARIC ISLANDS | CANARY ISLANDS | CANTABRIA | CASTILE LEON | CASTILE LA MANCHA | CATALONIA | EXTREMADURA | GALICIA | COMMUNITY OF MADRID | REGION OF MURCIA | C. C. OF NAVARRRE | LA RIOJA | VALENCIA | BASQUE COUNTRY |
|----------------------------------------------------------------------------------------------------------------|-----------|--------|----------------|------------------|----------------|-----------|--------------|-------------------|-----------|-------------|---------|---------------------|------------------|-------------------|----------|----------|----------------|
| <i>I Certain infectious and parasitic diseases</i>                                                             | 14,91     | 7,87   | 9,33           | 5,50             | 9,13           | 6,40      | 14,69        | 14,89             | 5,09      | 16,92       | 17,39   | 6,58                | 8,03             | 3,87              | 4,69     | 9,50     | 9,19           |
| <i>II Neoplasms</i>                                                                                            | 109,78    | 120,16 | 131,05         | 123,93           | 102,69         | 113,30    | 124,41       | 131,66            | 99,47     | 136,05      | 134,20  | 87,92               | 109,89           | 105,09            | 104,53   | 121,97   | 142,86         |
| <i>III Diseases of the blood and blood-forming organs and certain disorders involving the immune mechanism</i> | 91,98     | 97,53  | 76,71          | 61,03            | 83,72          | 57,30     | 76,59        | 83,38             | 63,33     | 121,10      | 94,43   | 63,74               | 89,23            | 40,54             | 58,16    | 85,98    | 108,07         |
| <i>IV Endocrine, nutritional and metabolic diseases</i>                                                        | 72,54     | 67,72  | 66,06          | 50,60            | 64,70          | 81,62     | 57,53        | 72,88             | 59,03     | 78,47       | 88,73   | 56,96               | 81,66            | 43,03             | 48,54    | 71,53    | 81,06          |
| <i>V Mental and behavioural disorders</i>                                                                      | 95,17     | 90,37  | 99,28          | 56,11            | 83,26          | 111,34    | 95,30        | 94,54             | 72,03     | 114,42      | 110,52  | 78,88               | 111,86           | 65,66             | 70,64    | 98,46    | 116,66         |
| <i>VI Diseases of the nervous system</i>                                                                       | 79,81     | 61,81  | 85,12          | 49,46            | 70,50          | 65,51     | 78,55        | 74,37             | 44,98     | 80,11       | 95,84   | 54,49               | 78,03            | 26,40             | 44,64    | 79,21    | 70,51          |
| <i>VII Diseases of the eye and adnexa</i>                                                                      | 44,13     | 42,99  | 47,85          | 28,72            | 40,94          | 45,41     | 45,05        | 44,12             | 29,17     | 56,76       | 48,63   | 29,62               | 46,43            | 18,80             | 29,77    | 41,70    | 45,77          |
| <i>VIII Diseases of the ear and mastoid process</i>                                                            | 33,04     | 26,90  | 33,55          | 18,33            | 31,33          | 29,05     | 27,30        | 26,82             | 18,89     | 47,66       | 42,55   | 21,63               | 35,98            | 13,85             | 18,54    | 29,13    | 37,40          |
| <i>IX Diseases of the circulatory system</i>                                                                   | 103,40    | 107,05 | 102,25         | 85,73            | 90,19          | 108,21    | 99,35        | 104,24            | 79,86     | 106,57      | 111,53  | 76,86               | 112,64           | 80,66             | 90,12    | 101,52   | 119,39         |
| <i>X Diseases of the respiratory system</i>                                                                    | 11,98     | 10,67  | 14,22          | 9,05             | 12,46          | 11,07     | 13,02        | 13,47             | 8,27      | 19,76       | 16,42   | 9,70                | 12,34            | 6,40              | 7,68     | 11,87    | 17,11          |
| <i>XI Diseases of the digestive system</i>                                                                     | 30,65     | 35,44  | 44,16          | 28,59            | 39,97          | 43,95     | 21,86        | 35,59             | 27,19     | 50,51       | 47,53   | 32,56               | 41,01            | 14,97             | 30,98    | 40,84    | 37,32          |
| <i>XII Diseases of the skin and subcutaneous tissue</i>                                                        | 36,37     | 29,84  | 46,22          | 24,18            | 35,30          | 42,96     | 37,86        | 37,34             | 25,36     | 39,37       | 47,80   | 28,91               | 39,30            | 20,61             | 27,26    | 33,74    | 51,91          |
| <i>XIII Diseases of the musculoskeletal system</i>                                                             | 70,24     | 66,93  | 79,55          | 50,35            | 65,45          | 75,67     | 70,00        | 71,17             | 54,13     | 85,89       | 85,54   | 56,26               | 73,79            | 43,11             | 52,76    | 71,05    | 92,61          |

|                                                                                                      |       |       |       |       |       |        |       |        |       |       |       |       |       |       |       |       |       |
|------------------------------------------------------------------------------------------------------|-------|-------|-------|-------|-------|--------|-------|--------|-------|-------|-------|-------|-------|-------|-------|-------|-------|
| <i>and connective tissue</i>                                                                         |       |       |       |       |       |        |       |        |       |       |       |       |       |       |       |       |       |
| <i>XIV Diseases of the genitourinary system</i>                                                      | 40,71 | 31,78 | 44,27 | 25,30 | 35,36 | 34,11  | 35,01 | 33,76  | 27,97 | 46,14 | 45,16 | 31,83 | 43,51 | 15,56 | 32,25 | 37,08 | 52,86 |
| <i>XV Pregnancy, childbirth and the puerperium</i>                                                   | 76,91 | 53,45 | 51,51 | 53,46 | 81,32 | 61,09  | 59,29 | 72,56  | 63,73 | 70,08 | 68,09 | 51,74 | 73,30 | 60,24 | 57,10 | 73,43 | 67,00 |
| <i>XVII Congenital malformations, deformations and chromosomal abnormalities</i>                     | 86,30 | 69,19 | 56,00 | 73,00 | 86,22 | 121,65 | 80,30 | 107,03 | 61,09 | 94,00 | 99,25 | 41,00 | 75,00 | 50,00 | 37,76 | 71,33 | 90,33 |
| <i>XVIII Symptoms, signs and abnormal clinical and laboratory findings, not elsewhere classified</i> | 36,13 | 29,88 | 38,00 | 23,00 | 26,00 | 42,50  | 33,23 | 36,11  | 20,82 | 38,50 | 37,25 | 28,00 | 51,00 | 9,00  | 28,45 | 31,67 | 37,67 |
| <i>XIX Injury, poisoning and certain other consequences of external causes</i>                       | 59,88 | 59,12 | 72,00 | 45,00 | 59,00 | 69,17  | 66,63 | 52,48  | 53,12 | 70,00 | 71,75 | 55,00 | 65,00 | 45,00 | 53,45 | 58,67 | 81,00 |

(1) Chapters XX, XXI y XXII are not included because the number of cases is not significant



Table 4. Sickness absence spells by diagnosis (ICD-10)

| Autonomous Community of Spain   | Code                    | Diagnosis                                                                | SA / 1000 affiliates/per month                        |      |
|---------------------------------|-------------------------|--------------------------------------------------------------------------|-------------------------------------------------------|------|
| <b>Andalusia</b>                | M54.5                   | Low back pain                                                            | 1,36                                                  |      |
|                                 | K52                     | Other noninfective gastroenteritis and colitis                           | 1,00                                                  |      |
|                                 | J00                     | Acute nasopharyngitis (common cold)                                      | 0,83                                                  |      |
|                                 | J11                     | Influenza, virus not identified                                          | 0,82                                                  |      |
|                                 | M54.2                   | Cervicalgia                                                              | 0,57                                                  |      |
|                                 | M54.3                   | Sciatica                                                                 | 0,52                                                  |      |
|                                 | J02.9                   | Acute pharyngitis, unspecified                                           | 0,40                                                  |      |
|                                 | J03.9                   | Acute tonsillitis, unspecified                                           | 0,38                                                  |      |
|                                 | <b>Aragon</b>           | K52.9                                                                    | Noninfective gastroenteritis and colitis, unspecified | 1,94 |
|                                 |                         | J11                                                                      | Influenza, virus not identified                       | 1,28 |
| M54.5                           |                         | Low back pain                                                            | 1,16                                                  |      |
| J02.9                           |                         | Acute pharyngitis, unspecified                                           | 0,97                                                  |      |
| M25                             |                         | Other joint disorders, not elsewhere classified                          | 0,76                                                  |      |
| M54.3                           |                         | Sciatica                                                                 | 0,42                                                  |      |
| M54.2                           |                         | Cervicalgia                                                              | 0,41                                                  |      |
| F41                             |                         | Other anxiety disorders                                                  | 0,38                                                  |      |
| <b>Principality of Asturias</b> | K52.9                   | Noninfective gastroenteritis and colitis, unspecified                    | 1,03                                                  |      |
|                                 | M54.5                   | Low back pain                                                            | 0,83                                                  |      |
|                                 | F41                     | Other anxiety disorders                                                  | 0,80                                                  |      |
|                                 | J11                     | Influenza, virus not identified                                          | 0,55                                                  |      |
|                                 | M54.3                   | Sciatica                                                                 | 0,46                                                  |      |
|                                 | M54.2                   | Cervicalgia                                                              | 0,40                                                  |      |
|                                 | J02.9                   | Acute pharyngitis, unspecified                                           | 0,30                                                  |      |
|                                 | M23                     | Internal derangement of knee                                             | 0,29                                                  |      |
|                                 | <b>Balearic Islands</b> | K52.9                                                                    | Noninfective gastroenteritis and colitis, unspecified | 2,29 |
| M54.5                           |                         | Low back pain                                                            | 1,61                                                  |      |
| B97.8                           |                         | Other viral agents as the cause of diseases classified to other chapters | 1,26                                                  |      |
| J11                             |                         | Influenza, virus not identified                                          | 1,15                                                  |      |
| F41.9                           |                         | Anxiety disorder, unspecified                                            | 0,77                                                  |      |
| J03.9                           |                         | Acute tonsillitis, unspecified                                           | 0,72                                                  |      |
| J00                             |                         | Acute nasopharyngitis (common cold)                                      | 0,60                                                  |      |
| M54.3                           |                         | Sciatica                                                                 | 0,60                                                  |      |
| <b>Canary Islands</b>           |                         | M54.5                                                                    | Low back pain                                         | 1,40 |
|                                 | J11                     | Influenza, virus not identified                                          | 1,16                                                  |      |
|                                 | K52.9                   | Noninfective gastroenteritis and colitis, unspecified                    | 1,02                                                  |      |
|                                 | J00                     | Acute nasopharyngitis (common cold)                                      | 0,82                                                  |      |
|                                 | J20.9                   | Acute bronchitis, unspecified                                            | 0,59                                                  |      |
|                                 | F06.4                   | Organic anxiety disorder                                                 | 0,57                                                  |      |

|                          |       |                                                                                |      |
|--------------------------|-------|--------------------------------------------------------------------------------|------|
|                          | M54.3 | Sciatica                                                                       | 0,51 |
|                          | M54.2 | Cervicalgia                                                                    | 0,44 |
| <b>Cantabria</b>         | K52.9 | Noninfective gastroenteritis and colitis, unspecified                          | 1,64 |
|                          | J11   | Influenza, virus not identified                                                | 1,13 |
|                          | M54.5 | Low back pain                                                                  | 0,98 |
|                          | R45   | Symptoms and signs involving emotional state                                   | 0,69 |
|                          | J02.9 | Acute pharyngitis, unspecified                                                 | 0,67 |
|                          | J06   | Acute upper respiratory infections of multiple and unspecified sites           | 0,66 |
|                          | M54.3 | Sciatica                                                                       | 0,61 |
|                          | M54.2 | Cervicalgia                                                                    | 0,57 |
| <b>Castile and Leon</b>  | M54.5 | Low back pain                                                                  | 1,28 |
|                          | J11   | Influenza, virus not identified                                                | 0,86 |
|                          | F41.9 | Anxiety disorder, unspecified                                                  | 0,53 |
|                          | M54.3 | Sciatica                                                                       | 0,52 |
|                          | J98.8 | Other specified respiratory disorders                                          | 0,40 |
|                          | J06.9 | Acute upper respiratory infection, unspecified                                 | 0,37 |
|                          | J00   | Acute nasopharyngitis (common cold)                                            | 0,30 |
|                          | K52   | Other noninfective gastroenteritis and colitis                                 | 0,10 |
| <b>Castile La Mancha</b> | M54.5 | Low back pain                                                                  | 1,22 |
|                          | K52.9 | Noninfective gastroenteritis and colitis, unspecified                          | 0,79 |
|                          | J00   | Acute nasopharyngitis (common cold)                                            | 0,62 |
|                          | J11   | Influenza, virus not identified                                                | 0,53 |
|                          | K52   | Other noninfective gastroenteritis and colitis                                 | 0,50 |
|                          | J03.9 | Acute tonsillitis, unspecified                                                 | 0,43 |
|                          | M54.2 | Cervicalgia                                                                    | 0,39 |
|                          | M54.3 | Sciatica                                                                       | 0,37 |
| <b>Catalonia</b>         | K52.9 | Noninfective gastroenteritis and colitis, unspecified                          | 2,82 |
|                          | J00   | Acute nasopharyngitis (common cold)                                            | 2,09 |
|                          | M54.5 | Low back pain                                                                  | 1,96 |
|                          | J11   | Influenza, virus not identified                                                | 1,58 |
|                          | F41.9 | Anxiety disorder, unspecified                                                  | 1,40 |
|                          | B97.8 | Other viral agents as the cause of diseases classified to other chapters       | 1,05 |
|                          | J03.9 | Acute tonsillitis, unspecified                                                 | 0,85 |
|                          | M54.2 | Cervicalgia                                                                    | 0,68 |
| <b>Extremadura</b>       | M54.5 | Low back pain                                                                  | 0,76 |
|                          | J11   | Influenza, virus not identified                                                | 0,49 |
|                          | S93   | Dislocation, sprain and strain of joints and ligaments at ankle and foot level | 0,28 |
|                          | M54.2 | Cervicalgia                                                                    | 0,23 |
|                          | M54.3 | Sciatica                                                                       | 0,20 |
|                          | F41   | Other anxiety disorders                                                        | 0,18 |

|                                       |       |                                                                                |      |
|---------------------------------------|-------|--------------------------------------------------------------------------------|------|
|                                       | M54.9 | Dorsalgia, unspecified                                                         | 0,17 |
|                                       | M75   | Shoulder lesions                                                               | 0,14 |
| <b>Galicia</b>                        | M54.5 | Low back pain                                                                  | 1,19 |
|                                       | J11   | Influenza, virus not identified                                                | 0,94 |
|                                       | M54.2 | Cervicalgia                                                                    | 0,47 |
|                                       | F41   | Other anxiety disorders                                                        | 0,44 |
|                                       | J20.9 | Acute bronchitis, unspecified                                                  | 0,42 |
|                                       | M54.3 | Sciatica                                                                       | 0,30 |
|                                       | J03.9 | Acute tonsillitis, unspecified                                                 | 0,28 |
|                                       | S93   | Dislocation, sprain and strain of joints and ligaments at ankle and foot level | 0,24 |
| <b>Community of Madrid</b>            | K52.9 | Noninfective gastroenteritis and colitis, unspecified                          | 1,51 |
|                                       | M54.5 | Low back pain                                                                  | 0,90 |
|                                       | F41   | Other anxiety disorders                                                        | 0,76 |
|                                       | J02.9 | Acute pharyngitis, unspecified                                                 | 0,67 |
|                                       | J11   | Influenza, virus not identified                                                | 0,53 |
|                                       | M25   | Other joint disorders, not elsewhere classified                                | 0,48 |
|                                       | M54.3 | Sciatica                                                                       | 0,45 |
|                                       | J06.9 | Acute upper respiratory infection, unspecified                                 | 0,43 |
| <b>Region of Murcia</b>               | K52.9 | Noninfective gastroenteritis and colitis, unspecified                          | 1,21 |
|                                       | J11   | Influenza, virus not identified                                                | 1,16 |
|                                       | M54.5 | Low back pain                                                                  | 1,13 |
|                                       | J02.9 | Acute pharyngitis, unspecified                                                 | 0,82 |
|                                       | M54.3 | Sciatica                                                                       | 0,69 |
|                                       | R45   | Symptoms and signs involving emotional state                                   | 0,62 |
|                                       | M54.2 | Cervicalgia                                                                    | 0,55 |
|                                       | J06.9 | Acute upper respiratory infection, unspecified                                 | 0,41 |
| <b>Chartered Community of Navarre</b> | K52.9 | Noninfective gastroenteritis and colitis, unspecified                          | 3,08 |
|                                       | J11   | Influenza, virus not identified                                                | 2,52 |
|                                       | M54.5 | Low back pain                                                                  | 1,88 |
|                                       | J06.9 | Acute upper respiratory infection, unspecified                                 | 1,62 |
|                                       | J00   | Acute nasopharyngitis (common cold)                                            | 1,26 |
|                                       | A08.5 | Other specified intestinal infections                                          | 0,98 |
|                                       | J20.9 | Acute bronchitis, unspecified                                                  | 0,95 |
|                                       | F41.9 | Anxiety disorder, unspecified                                                  | 0,89 |
| <b>La Rioja</b>                       | K52.9 | Noninfective gastroenteritis and colitis, unspecified                          | 2,20 |
|                                       | J00   | Acute nasopharyngitis (common cold)                                            | 1,42 |
|                                       | J11   | Influenza, virus not identified                                                | 1,14 |
|                                       | M54.5 | Low back pain                                                                  | 1,10 |
|                                       | M54.3 | Sciatica                                                                       | 0,56 |

|                       |       |                                                       |      |
|-----------------------|-------|-------------------------------------------------------|------|
|                       | J06.9 | Acute upper respiratory infection, unspecified        | 0,39 |
|                       | M25.5 | Pain in joint                                         | 0,36 |
|                       | R45.0 | Nervousness                                           | 0,35 |
| <b>Valencia</b>       | M54.5 | Low back pain                                         | 1,04 |
|                       | J11   | Influenza, virus not identified                       | 0,85 |
|                       | F41.9 | Anxiety disorder, unspecified                         | 0,56 |
|                       | K52.9 | Noninfective gastroenteritis and colitis, unspecified | 0,55 |
|                       | J00   | Acute nasopharyngitis (common cold)                   | 0,45 |
|                       | M54.2 | Cervicalgia                                           | 0,39 |
|                       | M54.3 | Sciatica                                              | 0,33 |
|                       | J20.9 | Acute bronchitis, unspecified                         | 0,32 |
| <b>Basque Country</b> | M54.5 | Low back pain                                         | 1,83 |
|                       | M54.2 | Cervicalgia                                           | 1,68 |
|                       | J00   | Acute nasopharyngitis (common cold)                   | 0,91 |
|                       | K52.9 | Noninfective gastroenteritis and colitis, unspecified | 0,75 |
|                       | J11   | Influenza, virus not identified                       | 0,63 |
|                       | F43.2 | Adjustment disorders                                  | 0,56 |
|                       | F41.9 | Anxiety disorder, unspecified                         | 0,49 |
|                       | R10   | Abdominal and pelvic pain                             | 0,35 |

Table 5. Sickness absence situations by occupational activities (International Standard Industrial Classification of all Economic Activities, ISIC Rev-4)

| Autonomous Community | Code | Occupational Activities                                                             | SA spells | SA / 1000 affiliates |
|----------------------|------|-------------------------------------------------------------------------------------|-----------|----------------------|
| <b>Andalusia</b>     | 8411 | General public administration activities                                            | 61.457    | 30,84                |
|                      | 8610 | Hospital activities                                                                 | 40.544    | 20,30                |
|                      | 8121 | General cleaning of buildings                                                       | 23.802    | 18,89                |
|                      | 5610 | Restaurants and mobile food service activities                                      | 23.377    | 28,5                 |
|                      | 5630 | Beverage serving activities                                                         | 20.659    | 10,74                |
|                      | 4100 | Construction of buildings                                                           | 16.608    | 10,22                |
|                      | 4711 | Retail sale in non-specialized stores with food, beverages or tobacco predominating | 16.253    | 9                    |
|                      | 5510 | Hotels and similar accommodation                                                    | 16.061    | 20,05                |
|                      | 4630 | Wholesale of food, beverage and tobacco                                             | 15.010    | 9,72                 |
|                      | 8220 | Activities of call centres                                                          | 14.652    | 69,07                |
| <b>Aragon</b>        | 8411 | General public administration activities                                            | 9.685     | 23,30                |

|                                 |      |                                                                                     |        |       |
|---------------------------------|------|-------------------------------------------------------------------------------------|--------|-------|
|                                 | 8610 | Hospital activities                                                                 | 8.022  | 16,61 |
|                                 | 7820 | Temporary employment agency activities                                              | 7.550  | 73,50 |
|                                 | 2930 | Manufacture of parts and accessories of motor vehicles                              | 5.874  | 11,70 |
|                                 | 8121 | General cleaning of buildings                                                       | 5.464  | 21,78 |
|                                 | 4711 | Retail sale in non-specialized stores with food, beverages or tobacco predominating | 3.773  | 5,3   |
|                                 | 5610 | Restaurants and mobile food service activities                                      | 3.669  | 28,5  |
|                                 | 8220 | Activities of call centres                                                          | 3.459  | 43    |
|                                 | 4923 | Freight transport by road                                                           | 3.214  | 15,57 |
|                                 | 5630 | Beverage serving activities                                                         | 3.073  | 10,95 |
| <b>Principality of Asturias</b> | 8610 | Hospital activities                                                                 | 6.422  | 20,65 |
|                                 | 4711 | Retail sale in non-specialized stores with food, beverages or tobacco predominating | 5.217  | 9,56  |
|                                 | 8411 | General public administration activities                                            | 4.000  | 19,21 |
|                                 | 5630 | Beverage serving activities                                                         | 2.560  | 10,46 |
|                                 | 2410 | Manufacture of basic iron and steel                                                 | 2.330  | 12,08 |
|                                 | 8121 | General cleaning of buildings                                                       | 2.285  | 13,6  |
|                                 | 5610 | Restaurants and mobile food service activities                                      | 2.047  | 22,45 |
|                                 | 8730 | Residential care activities for the elderly and disabled                            | 1.950  | 20,82 |
|                                 | 8122 | Other building and industrial cleaning activities                                   | 1.651  | 18    |
|                                 | 9700 | Activities of households as employers of domestic personnel                         | 1.365  | 8,51  |
| <b>Balearic Islands</b>         | 5510 | Hotels and similar accommodation                                                    | 19.736 | 30,31 |
|                                 | 5610 | Restaurants and mobile food service activities                                      | 9.399  | 13,6  |
|                                 | 8610 | Hospital activities                                                                 | 8.059  | 26,49 |
|                                 | 8411 | General public administration activities                                            | 6.141  | 27,19 |
|                                 | 4100 | Construction of buildings                                                           | 6.129  | 13    |
|                                 | 4711 | Retail sale in non-specialized stores with                                          | 5.078  | 8,44  |

|                         |      |                                                                                     |        |       |
|-------------------------|------|-------------------------------------------------------------------------------------|--------|-------|
|                         |      | food, beverages or tobacco predominating                                            |        |       |
|                         | 5630 | Beverage serving activities                                                         | 4.740  | 8,32  |
|                         | 8121 | General cleaning of buildings                                                       | 4.125  | 16,70 |
|                         | 5520 | Short term accommodation activities                                                 | 3.034  | 12,56 |
|                         | 4751 | Retail sale of textiles in specialized stores                                       | 2.408  | 21,6  |
| <b>Canary Islands</b>   | 5510 | Hotels and similar accommodation                                                    | 26.147 | 43,13 |
|                         | 8610 | Hospital activities                                                                 | 16.865 | 30,7  |
|                         | 8411 | General public administration activities                                            | 15.899 | 31,59 |
|                         | 5610 | Restaurants and mobile food service activities                                      | 11.628 | 18,32 |
|                         | 4711 | Retail sale in non-specialized stores with food, beverages or tobacco predominating | 10.495 | 7,9   |
|                         | 5520 | Short term accommodation activities                                                 | 7.221  | 32,30 |
|                         | 8121 | General cleaning of buildings                                                       | 7.000  | 18,7  |
|                         | 5630 | Beverage serving activities                                                         | 5.507  | 8,36  |
|                         | 4100 | Construction of buildings                                                           | 5.414  | 11,70 |
|                         | 8521 | General secondary education                                                         | 5.340  | 12,13 |
| <b>Cantabria</b>        | 8411 | General public administration activities                                            | 3.851  | 28,5  |
|                         | 7820 | Temporary employment agency activities                                              | 3.612  | 76,53 |
|                         | 8610 | Hospital activities                                                                 | 3.492  | 20,09 |
|                         | 8121 | General cleaning of buildings                                                       | 1.828  | 17,11 |
|                         | 5610 | Restaurants and mobile food service activities                                      | 1.616  | 22,5  |
|                         | 5630 | Beverage serving activities                                                         | 1.383  | 10,97 |
|                         | 8220 | Activities of call centres                                                          | 1.170  | 60    |
|                         | 8521 | General secondary education                                                         | 1.170  | 8,38  |
|                         | 4791 | Retail sale via mail order houses or via Internet                                   | 1.023  | 16,8  |
|                         | 8620 | Medical and dental practice activities                                              | 998    | 32    |
| <b>Castile and Leon</b> | 8411 | General public administration activities                                            | 9.940  | 16,89 |
|                         | 8610 | Hospital activities                                                                 | 9.741  | 12,04 |
|                         | 8220 | Activities of call centres                                                          | 8.920  | 85,14 |
|                         | 8121 | General cleaning of buildings                                                       | 7.489  | 17,87 |

|                          |      |                                                                                     |        |       |
|--------------------------|------|-------------------------------------------------------------------------------------|--------|-------|
|                          | 4711 | Retail sale in non-specialized stores with food, beverages or tobacco predominating | 5.953  | 7,94  |
|                          | 8790 | Other residential care activities                                                   | 5.089  | 21,95 |
|                          | 5630 | Beverage serving activities                                                         | 5.023  | 14,59 |
|                          | 7820 | Temporary employment agency activities                                              | 4.676  | 45,75 |
|                          | 5610 | Restaurants and mobile food service activities                                      | 4.493  | 24,90 |
|                          | 2910 | Manufacture of motor vehicles                                                       | 4.409  | 10,35 |
| <b>Castile La Mancha</b> | 8411 | General public administration activities                                            | 15.003 | 22,17 |
|                          | 8610 | Hospital activities                                                                 | 7.820  | 14,89 |
|                          | 8121 | General cleaning of buildings                                                       | 5.363  | 19,98 |
|                          | 7820 | Temporary employment agency activities                                              | 5.272  | 56,70 |
|                          | 5210 | Warehousing and storage                                                             | 5.251  | 60    |
|                          | 4100 | Construction of buildings                                                           | 4.479  | 8,94  |
|                          | 4711 | Retail sale in non-specialized stores with food, beverages or tobacco predominating | 4.267  | 5,06  |
|                          | 5610 | Restaurants and mobile food service activities                                      | 4.092  | 32,54 |
|                          | 4923 | Freight transport by road                                                           | 3.846  | 14,08 |
|                          | 5630 | Beverage serving activities                                                         | 3.526  | 10,62 |
| <b>Catalonia</b>         | 8610 | Hospital activities                                                                 | 75.958 | 32,68 |
|                          | 8411 | General public administration activities                                            | 70.569 | 32,11 |
|                          | 5610 | Restaurants and mobile food service activities                                      | 45.084 | 47    |
|                          | 8121 | General cleaning of buildings                                                       | 44.117 | 22,8  |
|                          | 7820 | Temporary employment agency activities                                              | 43.109 | 73,56 |
|                          | 8220 | Activities of call centres                                                          | 37.877 | 74,91 |
|                          | 4711 | Retail sale in non-specialized stores with food, beverages or tobacco predominating | 30.528 | 12,95 |
|                          | 4751 | Retail sale of textiles in specialized stores                                       | 24.417 | 10,36 |
|                          | 8812 | Social work activities without accommodation for the elderly and disabled           | 20.007 | 43,56 |
|                          | 8423 | Public order and safety                                                             | 19.807 | 65    |

|                            |      |                                                                                     |        |       |
|----------------------------|------|-------------------------------------------------------------------------------------|--------|-------|
|                            |      | activities                                                                          |        |       |
| <b>Extremadura</b>         | 8411 | General public administration activities                                            | 10.813 | 23,68 |
|                            | 8610 | Hospital activities                                                                 | 5.921  | 17,95 |
|                            | 8121 | General cleaning of buildings                                                       | 2.007  | 19,56 |
|                            | 8812 | Social work activities without accommodation for the elderly and disabled           | 1.643  | 18    |
|                            | 4100 | Construction of buildings                                                           | 1.610  | 7,48  |
|                            | 5630 | Beverage serving activities                                                         | 1.599  | 10,55 |
|                            | 4711 | Retail sale in non-specialized stores with food, beverages or tobacco predominating | 1.136  | 3,98  |
|                            | 5610 | Restaurants and mobile food service activities                                      | 1.044  | 13,64 |
|                            | 4923 | Freight transport by road                                                           | 914    | 12,89 |
|                            | 0150 | Mixed farming                                                                       | 902    | 8,79  |
| <b>Galicia</b>             | 8610 | Hospital activities                                                                 | 12.552 | 16,6  |
|                            | 8411 | General public administration activities                                            | 12.137 | 19,12 |
|                            | 4711 | Retail sale in non-specialized stores with food, beverages or tobacco predominating | 7.498  | 6,4   |
|                            | 5630 | Beverage serving activities                                                         | 6.532  | 12    |
|                            | 8121 | General cleaning of buildings                                                       | 5.775  |       |
|                            | 7820 | Temporary employment agency activities                                              | 5.270  | 40,61 |
|                            | 9700 | Activities of households as employers of domestic personnel                         | 4.830  | 11,45 |
|                            | 5610 | Restaurants and mobile food service activities                                      | 4.664  | 17,6  |
|                            | 8220 | Activities of call centres                                                          | 4.558  | 47,19 |
|                            | 4100 | Construction of buildings                                                           | 3.622  | 5,27  |
| <b>Community of Madrid</b> | 8610 | Hospital activities                                                                 | 44.482 | 17,65 |
|                            | 8121 | General cleaning of buildings                                                       | 42.703 | 20,63 |
|                            | 5610 | Restaurants and mobile food service activities                                      | 36.939 | 28,54 |
|                            | 4711 | General public administration activities                                            | 35.475 | 21,94 |
|                            | 8220 | Activities of call centres                                                          | 29.212 | 67,3  |
|                            | 4711 | Retail sale in non-specialized stores with food, beverages or                       | 28.014 | 7,57  |



|                                       |      |                                                                                     |        |       |
|---------------------------------------|------|-------------------------------------------------------------------------------------|--------|-------|
|                                       |      | tobacco predominating                                                               |        |       |
|                                       | 9700 | Activities of households as employers of domestic personnel                         | 21.385 | 20,93 |
|                                       | 8299 | Other business support service activities n.e.c                                     | 20.351 | 13    |
|                                       | 5630 | Beverage serving activities                                                         | 17.608 | 12,05 |
|                                       | 4751 | Retail sale of textiles in specialized stores                                       | 15.735 | 15,31 |
| <b>Region of Murcia</b>               | 8620 | Medical and dental practice activities                                              | 11.008 | 34,8  |
|                                       | 0113 | Growing of vegetables and melons, roots and tubers                                  | 7.233  | 28,29 |
|                                       | 7820 | Temporary employment agency activities                                              | 6.037  | 23,35 |
|                                       | 4711 | General public administration activities                                            | 6.003  | 24,41 |
|                                       | 8121 | General cleaning of buildings                                                       | 4.915  | 25,01 |
|                                       | 5610 | Restaurants and mobile food service activities                                      | 3.672  | 34,02 |
|                                       | 5630 | Beverage serving activities                                                         | 3.635  | 21,63 |
|                                       | 4630 | Wholesale of food, beverage and tobacco                                             | 3.514  | 13,62 |
|                                       | 4711 | Retail sale in non-specialized stores with food, beverages or tobacco predominating | 3.228  | 8,96  |
|                                       | 4923 | Freight transport by road                                                           | 2,914  | 14,28 |
| <b>Chartered Community of Navarre</b> | 8610 | Hospital activities                                                                 | 14.408 | 46,16 |
|                                       | 8411 | General public administration activities                                            | 7.408  | 57,01 |
|                                       | 2930 | Manufacture of parts and accessories of motor vehicles                              | 5.782  | 18,2  |
|                                       | 7820 | Temporary employment agency activities                                              | 5.558  | 94,19 |
|                                       | 8521 | General secondary education                                                         | 3.909  | 19,86 |
|                                       | 8121 | General cleaning of buildings                                                       | 3.520  | 31,17 |
|                                       | 1030 | Processing and preserving of fruit and vegetables                                   | 3.256  | 38,37 |
|                                       | 2910 | Manufacture of motor vehicles                                                       | 3.195  | 17,07 |
|                                       | 8812 | Social work activities without accommodation for the elderly and                    | 3.151  | 76,35 |

|                       |      |                                                                                     |        |       |
|-----------------------|------|-------------------------------------------------------------------------------------|--------|-------|
|                       |      | disabled                                                                            |        |       |
|                       | 9700 | Activities of households as employers of domestic personnel                         | 2.382  | 23,71 |
| <b>La Rioja</b>       | 8610 | Hospital activities                                                                 | 1.698  | 18,25 |
|                       | 8611 | General public administration activities                                            | 1.612  | 22,76 |
|                       | 1520 | Manufacture of footwear                                                             | 1.463  | 38,2  |
|                       | 8121 | General cleaning of buildings                                                       | 1.290  | 29,05 |
|                       | 1030 | Processing and preserving of fruit and vegetables                                   | 1.217  | 27,4  |
|                       | 7820 | Temporary employment agency activities                                              | 1.060  | 71,12 |
|                       | 2930 | Manufacture of parts and accessories of motor vehicles                              | 1.006  | 12,1  |
|                       | 5630 | Beverage serving activities                                                         | 973    | 14,3  |
|                       | 1102 | Manufacture of wines                                                                | 962    | 13,09 |
|                       | 0113 | Growing of vegetables and melons, roots and tubers                                  | 907    | 21,5  |
| <b>Valencia</b>       | 8610 | Hospital activities                                                                 | 24.063 | 21,57 |
|                       | 8611 | General public administration activities                                            | 23.311 | 24,51 |
|                       | 5610 | Restaurants and mobile food service activities                                      | 16.234 | 20,93 |
|                       | 8121 | General cleaning of buildings                                                       | 12.758 | 16,04 |
|                       | 4711 | Retail sale in non-specialized stores with food, beverages or tobacco predominating | 11.239 | 6,14  |
|                       | 4630 | Wholesale of food, beverage and tobacco                                             | 7.300  | 8,81  |
|                       | 5630 | Beverage serving activities                                                         | 8.732  | 6,49  |
|                       | 4923 | Freight transport by road                                                           | 7.300  | 11,49 |
|                       | 7820 | Temporary employment agency activities                                              | 7.126  | 29,24 |
|                       | 4100 | Construction of buildings                                                           | 6.663  | 6,21  |
| <b>Basque Country</b> | 8610 | Hospital activities                                                                 | 22.704 | 30,48 |
|                       | 8611 | General public administration activities                                            | 15.565 | 27,16 |
|                       | 8121 | General cleaning of buildings                                                       | 13.043 | 29,20 |
|                       | 8521 | General secondary education                                                         | 12.519 | 14,51 |
|                       | 8812 | Social work activities without accommodation for the elderly and                    | 8.760  | 14,75 |

|  |      |                                                                                     |       |       |
|--|------|-------------------------------------------------------------------------------------|-------|-------|
|  |      | disabled                                                                            |       |       |
|  | 5610 | Restaurants and mobile food service activities                                      | 8.419 | 29,01 |
|  | 4711 | Retail sale in non-specialized stores with food, beverages or tobacco predominating | 6.625 | 6,6   |
|  | 9700 | Activities of households as employers of domestic personnel                         | 6.284 | 18,55 |
|  | 2591 | Forging, pressing, stamping and roll-forming of metal; powder metallurgy            | 6.086 | 10,29 |
|  | 5630 | Beverage serving activities                                                         | 5.842 | 18,02 |

STROBE Statement—Checklist of items that should be included in reports of *cohort studies*

|                              | Item No | Recommendation                                                                                                                                                                                                                                                                                                         | Page No               |
|------------------------------|---------|------------------------------------------------------------------------------------------------------------------------------------------------------------------------------------------------------------------------------------------------------------------------------------------------------------------------|-----------------------|
| <b>Title and abstract</b>    | 1       | (a) Indicate the study's design with a commonly used term in the title or the abstract<br>(b) Provide in the abstract an informative and balanced summary of what was done and what was found                                                                                                                          | 1<br>1                |
| <b>Introduction</b>          |         |                                                                                                                                                                                                                                                                                                                        |                       |
| Background/rationale         | 2       | Explain the scientific background and rationale for the investigation being reported                                                                                                                                                                                                                                   | 3                     |
| Objectives                   | 3       | State specific objectives, including any prespecified hypotheses                                                                                                                                                                                                                                                       | 4                     |
| <b>Methods</b>               |         |                                                                                                                                                                                                                                                                                                                        |                       |
| Study design                 | 4       | Present key elements of study design early in the paper                                                                                                                                                                                                                                                                | 4                     |
| Setting                      | 5       | Describe the setting, locations, and relevant dates, including periods of recruitment, exposure, follow-up, and data collection                                                                                                                                                                                        | 4-5                   |
| Participants                 | 6       | (a) Give the eligibility criteria, and the sources and methods of selection of participants. Describe methods of follow-up<br>(b) For matched studies, give matching criteria and number of exposed and unexposed                                                                                                      | 4-5<br>5              |
| Variables                    | 7       | Clearly define all outcomes, exposures, predictors, potential confounders, and effect modifiers. Give diagnostic criteria, if applicable                                                                                                                                                                               | 5                     |
| Data sources/<br>measurement | 8*      | For each variable of interest, give sources of data and details of methods of assessment (measurement). Describe comparability of assessment methods if there is more than one group                                                                                                                                   | 5                     |
| Bias                         | 9       | Describe any efforts to address potential sources of bias                                                                                                                                                                                                                                                              | 5                     |
| Study size                   | 10      | Explain how the study size was arrived at                                                                                                                                                                                                                                                                              | 5                     |
| Quantitative variables       | 11      | Explain how quantitative variables were handled in the analyses. If applicable, describe which groupings were chosen and why                                                                                                                                                                                           | 5                     |
| Statistical methods          | 12      | (a) Describe all statistical methods, including those used to control for confounding<br>(b) Describe any methods used to examine subgroups and interactions<br>(c) Explain how missing data were addressed<br>(d) If applicable, explain how loss to follow-up was addressed<br>(e) Describe any sensitivity analyses | 5<br>5<br>5<br>5<br>5 |
| <b>Results</b>               |         |                                                                                                                                                                                                                                                                                                                        |                       |
| Participants                 | 13*     | (a) Report numbers of individuals at each stage of study—eg numbers potentially eligible, examined for eligibility, confirmed eligible, included in the study, completing follow-up, and analysed<br>(b) Give reasons for non-participation at each stage<br>(c) Consider use of a flow diagram                        | 5<br>5<br>-           |
| Descriptive data             | 14*     | (a) Give characteristics of study participants (eg demographic, clinical, social) and information on exposures and potential confounders<br>(b) Indicate number of participants with missing data for each variable of interest<br>(c) Summarise follow-up time (eg, average and total amount)                         | 5<br>5<br>5           |
| Outcome data                 | 15*     | Report numbers of outcome events or summary measures over time                                                                                                                                                                                                                                                         | 6                     |

|    |                          |    |                                                                                                                                                                                                              |     |
|----|--------------------------|----|--------------------------------------------------------------------------------------------------------------------------------------------------------------------------------------------------------------|-----|
| 1  | Main results             | 16 | (a) Give unadjusted estimates and, if applicable, confounder-adjusted estimates and their precision (eg, 95% confidence interval). Make clear which confounders were adjusted for and why they were included | 6-7 |
| 2  |                          |    |                                                                                                                                                                                                              |     |
| 3  |                          |    | (b) Report category boundaries when continuous variables were categorized                                                                                                                                    |     |
| 4  |                          |    | (c) If relevant, consider translating estimates of relative risk into absolute risk for a meaningful time period                                                                                             |     |
| 5  | Other analyses           | 17 | Report other analyses done—eg analyses of subgroups and interactions, and sensitivity analyses                                                                                                               | 6-7 |
| 6  |                          |    |                                                                                                                                                                                                              |     |
| 7  |                          |    |                                                                                                                                                                                                              |     |
| 8  |                          |    |                                                                                                                                                                                                              |     |
| 9  |                          |    |                                                                                                                                                                                                              |     |
| 10 |                          |    |                                                                                                                                                                                                              |     |
| 11 | <b>Discussion</b>        |    |                                                                                                                                                                                                              |     |
| 12 | Key results              | 18 | Summarise key results with reference to study objectives                                                                                                                                                     | 7   |
| 13 | Limitations              | 19 | Discuss limitations of the study, taking into account sources of potential bias or imprecision. Discuss both direction and magnitude of any potential bias                                                   | 2   |
| 14 |                          |    |                                                                                                                                                                                                              |     |
| 15 | Interpretation           | 20 | Give a cautious overall interpretation of results considering objectives, limitations, multiplicity of analyses, results from similar studies, and other relevant evidence                                   | 7-9 |
| 16 |                          |    |                                                                                                                                                                                                              |     |
| 17 | Generalisability         | 21 | Discuss the generalisability (external validity) of the study results                                                                                                                                        | 7-9 |
| 18 |                          |    |                                                                                                                                                                                                              |     |
| 19 |                          |    |                                                                                                                                                                                                              |     |
| 20 |                          |    |                                                                                                                                                                                                              |     |
| 21 | <b>Other information</b> |    |                                                                                                                                                                                                              |     |
| 22 | Funding                  | 22 | Give the source of funding and the role of the funders for the present study and, if applicable, for the original study on which the present article is based                                                | 10  |
| 23 |                          |    |                                                                                                                                                                                                              |     |
| 24 |                          |    |                                                                                                                                                                                                              |     |
| 25 |                          |    |                                                                                                                                                                                                              |     |

26 \*Give information separately for exposed and unexposed groups.

27  
28 **Note:** An Explanation and Elaboration article discusses each checklist item and gives methodological background and  
29 published examples of transparent reporting. The STROBE checklist is best used in conjunction with this article (freely  
30 available on the Web sites of PLoS Medicine at <http://www.plosmedicine.org/>, Annals of Internal Medicine at  
31 <http://www.annals.org/>, and Epidemiology at <http://www.epidem.com/>). Information on the STROBE Initiative is  
32 available at <http://www.strobe-statement.org>.  
33  
34  
35  
36  
37  
38  
39  
40  
41  
42  
43  
44  
45  
46  
47  
48  
49  
50  
51  
52  
53  
54  
55  
56  
57  
58  
59  
60
